# Supplementary material for: Rare Ophiuroid-Type Steroid 3β,21-, 3β,22-, and 3α,22-Disulfates from the Slime Sea Star Pteraster marsippus and Their Colony-Inhibiting Effects against Human Breast Cancer Cells
Source: MDPI journal article supplement (doi:10.3390/md22010043), 2024-01-12

## Supplementary Materials

# Rare Ophiuroid Type Steroid 3 $\beta$ ,21-, 3 $\beta$ ,22-, and 3 $\alpha$ ,22-Disulfates from the Slime Sea Star *Pteraster marsippus* and Their Colony-Inhibiting Effects Against Human Breast Cancer Cells

Alla A. Kicha<sup>1\*</sup>, Timofey V. Malyarenko<sup>1,2</sup>, Alexandra S. Kuzmich<sup>1</sup>, Olesya S. Malyarenko<sup>1</sup>, Anatoly I. Kalinovsky<sup>1</sup>, Roman S. Popov<sup>1</sup>, Dmitriy K. Tolkanov<sup>1</sup> and Natalia V. Ivanchina<sup>1\*</sup>

<sup>1</sup> G.B. Elyakov Pacific Institute of Bioorganic Chemistry, Far Eastern Branch, Russian Academy of Sciences, Pr. 100-let Vladivostoku 159, 690022 Vladivostok, Russia; malyarenko-tv@mail.ru (T.V.M.); assavina@mail.ru (A.S.K.); malyarenko.os@gmail.com (O.S.M.); kaaniw@piboc.dvo.ru (A.I.K.); [prs\\_90@mail.ru](mailto:prs_90@mail.ru) (R.S.P.); tolkanov.dk@gmail.com (D.K.T.);

<sup>2</sup> Department of Bioorganic Chemistry and Biotechnology, School of Natural Sciences, Far Eastern Federal University, Russky Island, Ajax Bay, 10, 690922, Vladivostok, Russia

\* Correspondence: kicha@piboc.dvo.ru (A.A.K.); ivanchina@piboc.dvo.ru (N.V.I.). Tel.: +7-423-2312-360; Fax: +7-423-2314-050

**List**

|                                                                                                                         | <b>Page</b> |
|-------------------------------------------------------------------------------------------------------------------------|-------------|
| <b>Figure S1.</b> HRESIMS and HRESIMS/MS spectra of compound <b>1</b>                                                   | 4           |
| <b>Figure S2.</b> $^1\text{H}$ NMR (700.13 MHz, $\text{CD}_3\text{OD}$ ) spectrum of compound <b>1</b>                  | 5           |
| <b>Figure S3.</b> $^{13}\text{C}$ NMR (176.04 MHz, $\text{CD}_3\text{OD}$ ) spectrum of compound <b>1</b>               | 6           |
| <b>Figure S4.</b> $^1\text{H}$ - $^1\text{H}$ COSY (700.13 MHz, $\text{CD}_3\text{OD}$ ) spectrum of compound <b>1</b>  | 7           |
| <b>Figure S5.</b> HSQC (700.13 MHz, $\text{CD}_3\text{OD}$ ) spectrum of compound <b>1</b>                              | 8           |
| <b>Figure S6.</b> HMBC (700.13 MHz, $\text{CD}_3\text{OD}$ ) spectrum of compound <b>1</b>                              | 9           |
| <b>Figure S7.</b> ROESY (700.13 MHz, $\text{CD}_3\text{OD}$ ) spectrum of compound <b>1</b>                             | 10          |
| <b>Figure S8.</b> HRESIMS and HRESIMS/MS spectra of compound <b>2</b>                                                   | 11          |
| <b>Figure S9.</b> $^1\text{H}$ NMR (700.13 MHz, $\text{CD}_3\text{OD}$ ) spectrum of compound <b>2</b>                  | 12          |
| <b>Figure S10.</b> $^{13}\text{C}$ NMR (176.04 MHz, $\text{CD}_3\text{OD}$ ) spectrum of compound <b>2</b>              | 13          |
| <b>Figure S11.</b> $^1\text{H}$ - $^1\text{H}$ COSY (700.13 MHz, $\text{CD}_3\text{OD}$ ) spectrum of compound <b>2</b> | 14          |
| <b>Figure S12.</b> HSQC (700.13 MHz, $\text{CD}_3\text{OD}$ ) spectrum of compound <b>2</b>                             | 15          |
| <b>Figure S13.</b> HMBC (700.13 MHz, $\text{CD}_3\text{OD}$ ) spectrum of compound <b>2</b>                             | 16          |
| <b>Figure S14.</b> ROESY (700.13 MHz, $\text{CD}_3\text{OD}$ ) spectrum of compound <b>2</b>                            | 17          |
| <b>Figure S15.</b> HRESIMS and HRESIMS/MS spectra of compound <b>3</b>                                                  | 18          |
| <b>Figure S16.</b> $^1\text{H}$ NMR (700.13 MHz, $\text{CD}_3\text{OD}$ ) spectrum of compound <b>3</b>                 | 19          |
| <b>Figure S17.</b> $^{13}\text{C}$ NMR (176.04 MHz, $\text{CD}_3\text{OD}$ ) spectrum of compound <b>3</b>              | 20          |
| <b>Figure S18.</b> $^1\text{H}$ - $^1\text{H}$ COSY (700.13 MHz, $\text{CD}_3\text{OD}$ ) spectrum of compound <b>3</b> | 21          |
| <b>Figure S19.</b> HSQC (700.13 MHz, $\text{CD}_3\text{OD}$ ) spectrum of compound <b>3</b>                             | 22          |
| <b>Figure S20.</b> HMBC (700.13 MHz, $\text{CD}_3\text{OD}$ ) spectrum of compound <b>3</b>                             | 23          |
| <b>Figure S21.</b> ROESY (700.13 MHz, $\text{CD}_3\text{OD}$ ) spectrum of compound <b>3</b>                            | 24          |
| <b>Figure S22.</b> HRESIMS and HRESIMS/MS spectra of compound <b>4</b>                                                  | 25          |
| <b>Figure S23.</b> $^1\text{H}$ NMR (500.13 MHz, $\text{CD}_3\text{OD}$ ) spectrum of compound <b>4</b>                 | 26          |
| <b>Figure S24.</b> $^{13}\text{C}$ NMR (176.04 MHz, $\text{CD}_3\text{OD}$ ) spectrum of compound <b>4</b>              | 27          |
| <b>Figure S25.</b> $^1\text{H}$ - $^1\text{H}$ COSY (700.13 MHz, $\text{CD}_3\text{OD}$ ) spectrum of compound <b>4</b> | 28          |
| <b>Figure S26.</b> HSQC (700.13 MHz, $\text{CD}_3\text{OD}$ ) spectrum of compound <b>4</b>                             | 29          |
| <b>Figure S27.</b> HMBC (700.13 MHz, $\text{CD}_3\text{OD}$ ) spectrum of compound <b>4</b>                             | 30          |
| <b>Figure S28.</b> ROESY (700.13 MHz, $\text{CD}_3\text{OD}$ ) spectrum of compound <b>4</b>                            | 31          |
| <b>Figure S29.</b> HRESIMS spectrum of compound <b>5</b>                                                                | 32          |
| <b>Figure S30.</b> $^1\text{H}$ NMR (700.13 MHz, $\text{CD}_3\text{OD}$ ) spectrum of compound <b>5</b>                 | 33          |
| <b>Figure S31.</b> $^{13}\text{C}$ NMR (176.04 MHz, $\text{CD}_3\text{OD}$ ) spectrum of compound <b>5</b>              | 34          |
| <b>Figure S32.</b> DEPT (176.04 MHz, $\text{CD}_3\text{OD}$ ) spectrum of compound <b>5</b>                             | 35          |

|                                                                                         |    |
|-----------------------------------------------------------------------------------------|----|
| <b>Figure S33.</b> COSY (700.13 MHz, CD <sub>3</sub> OD) spectrum of compound <b>5</b>  | 36 |
| <b>Figure S34.</b> HSQC (700.13 MHz, CD <sub>3</sub> OD) spectrum of compound <b>5</b>  | 37 |
| <b>Figure S35.</b> HMBC (700.13 MHz, CD <sub>3</sub> OD) spectrum of compound <b>5</b>  | 38 |
| <b>Figure S36.</b> ROESY (700.13 MHz, CD <sub>3</sub> OD) spectrum of compound <b>5</b> | 39 |

**Figure S1.** HRESIMS and HRESIMS/MS spectra of compound **1**.

(-)HRESIMS:  $[M - Na]^-$  and  $[M - 2Na]^{2-}$  ions

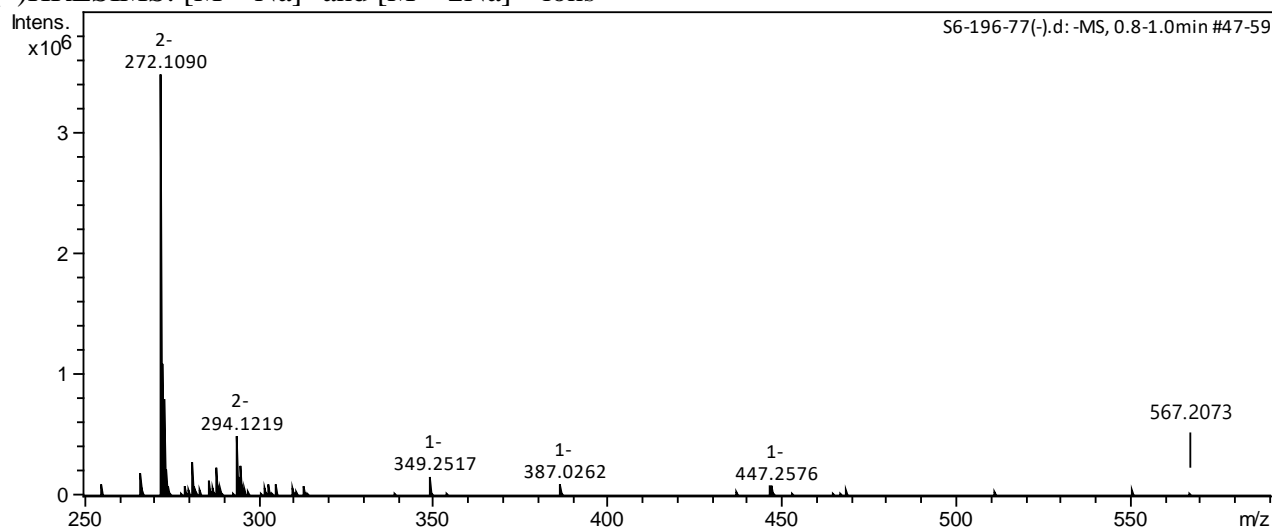

(+)HRESIMS:  $[M + Na]^+$  ion

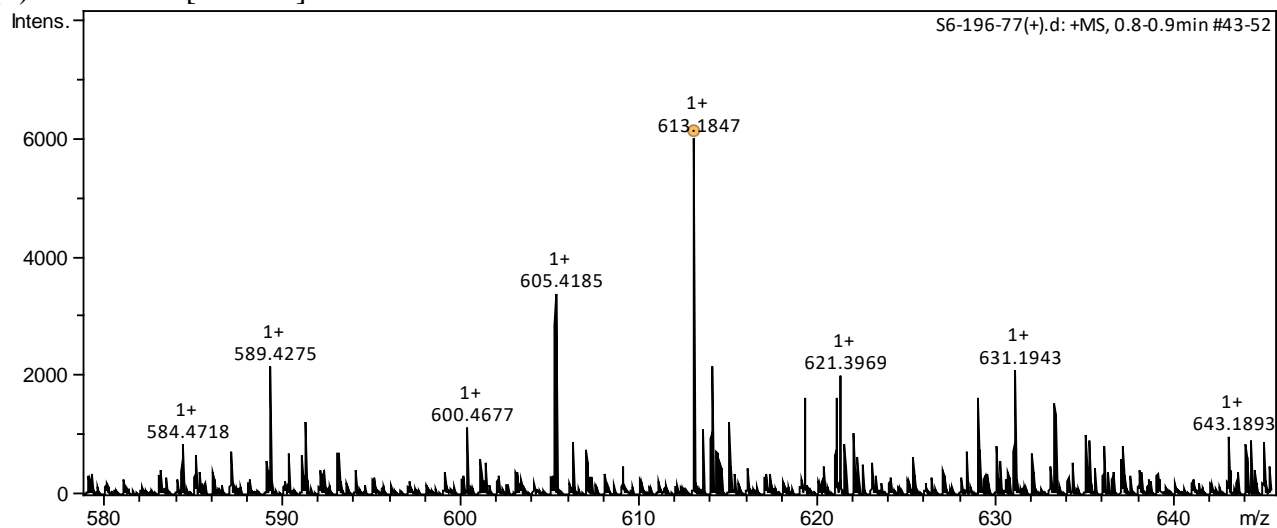

(-)HRESIMS/MS of the  $[M - 2Na]^{2-}$  ion at m/z 272.1076

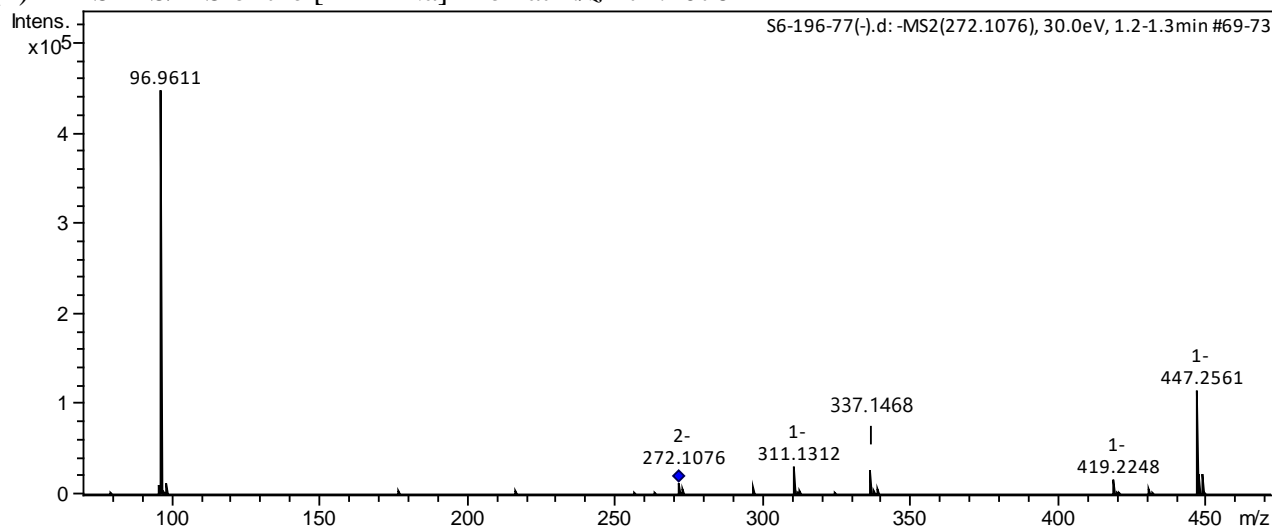

**Figure S2.**  $^1\text{H}$  NMR (700.13 MHz,  $\text{CD}_3\text{OD}$ ) spectrum of compound **1**.

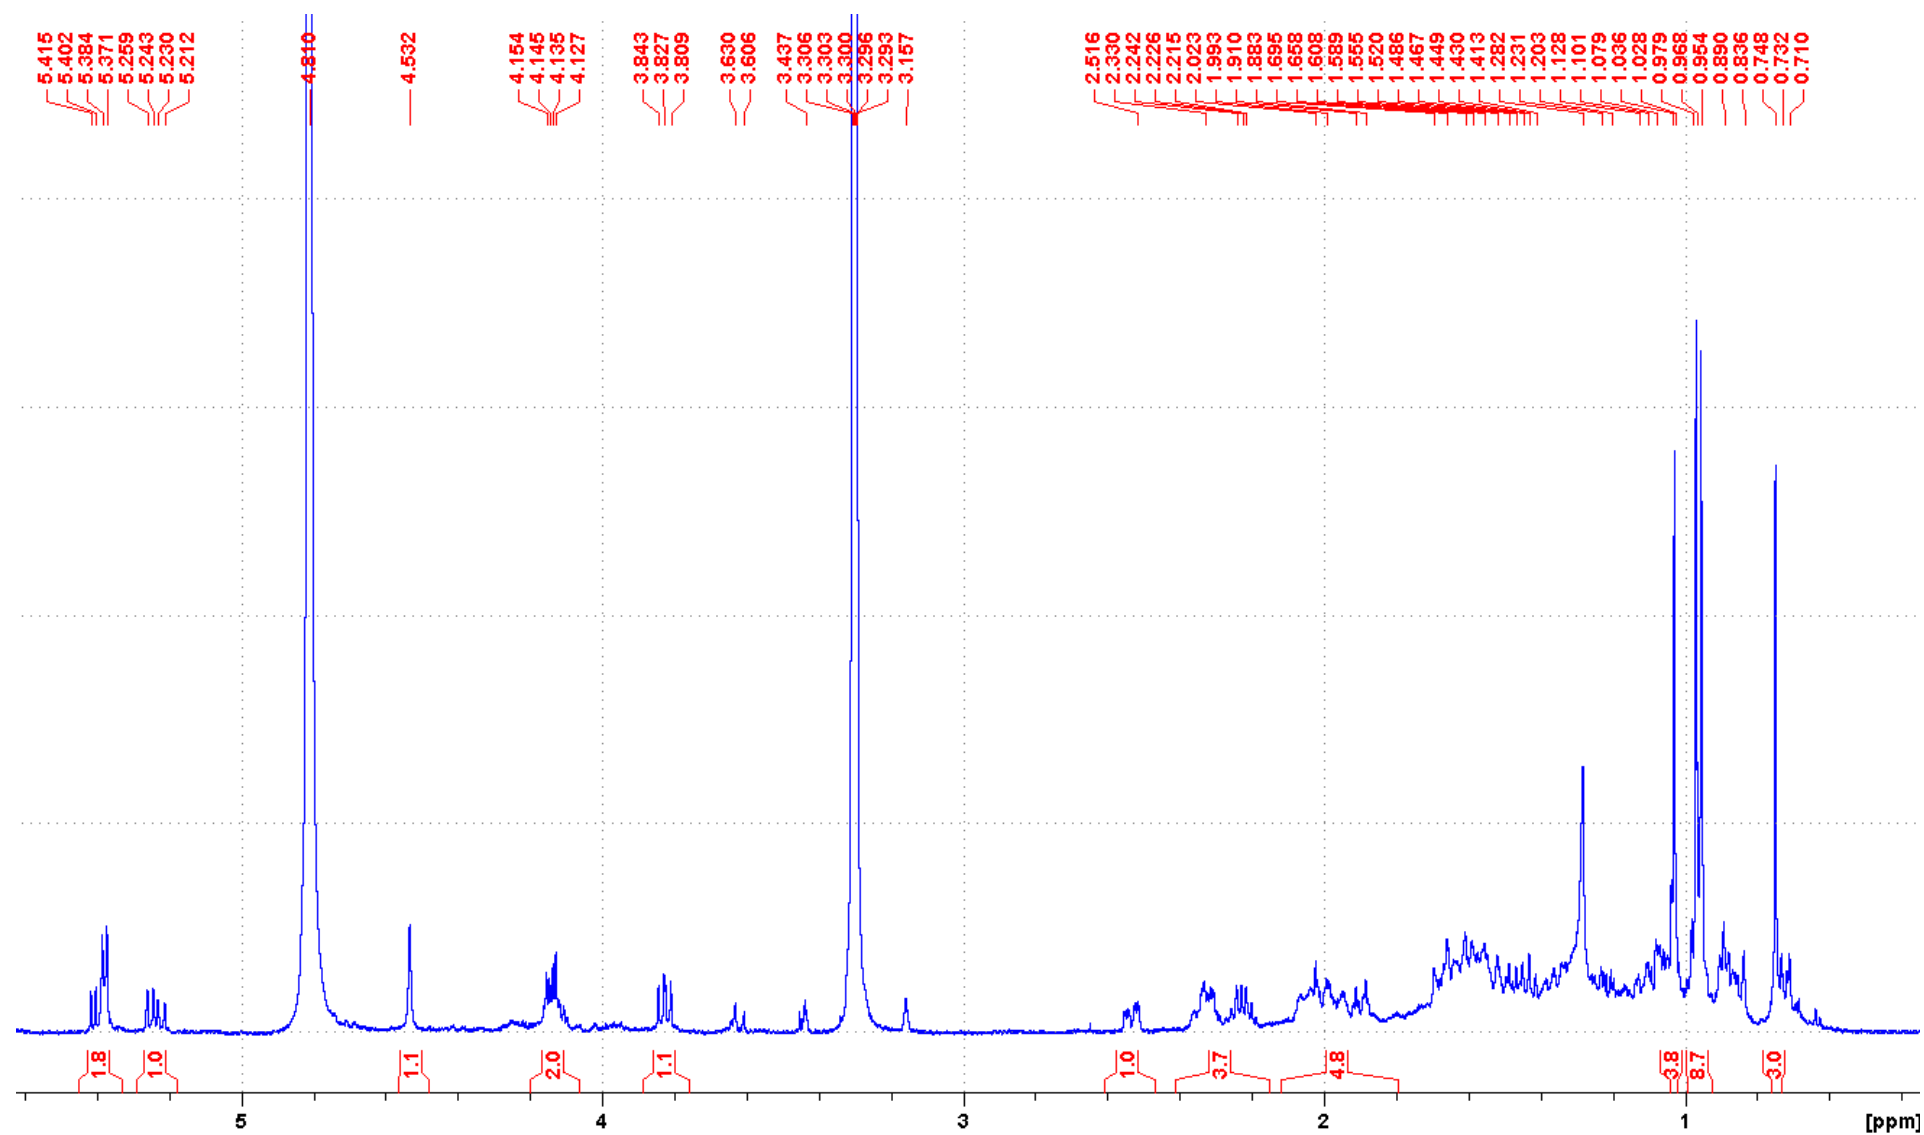

**Figure S3.**  $^{13}\text{C}$  NMR (176.04 MHz,  $\text{CD}_3\text{OD}$ ) spectrum of compound **1**.

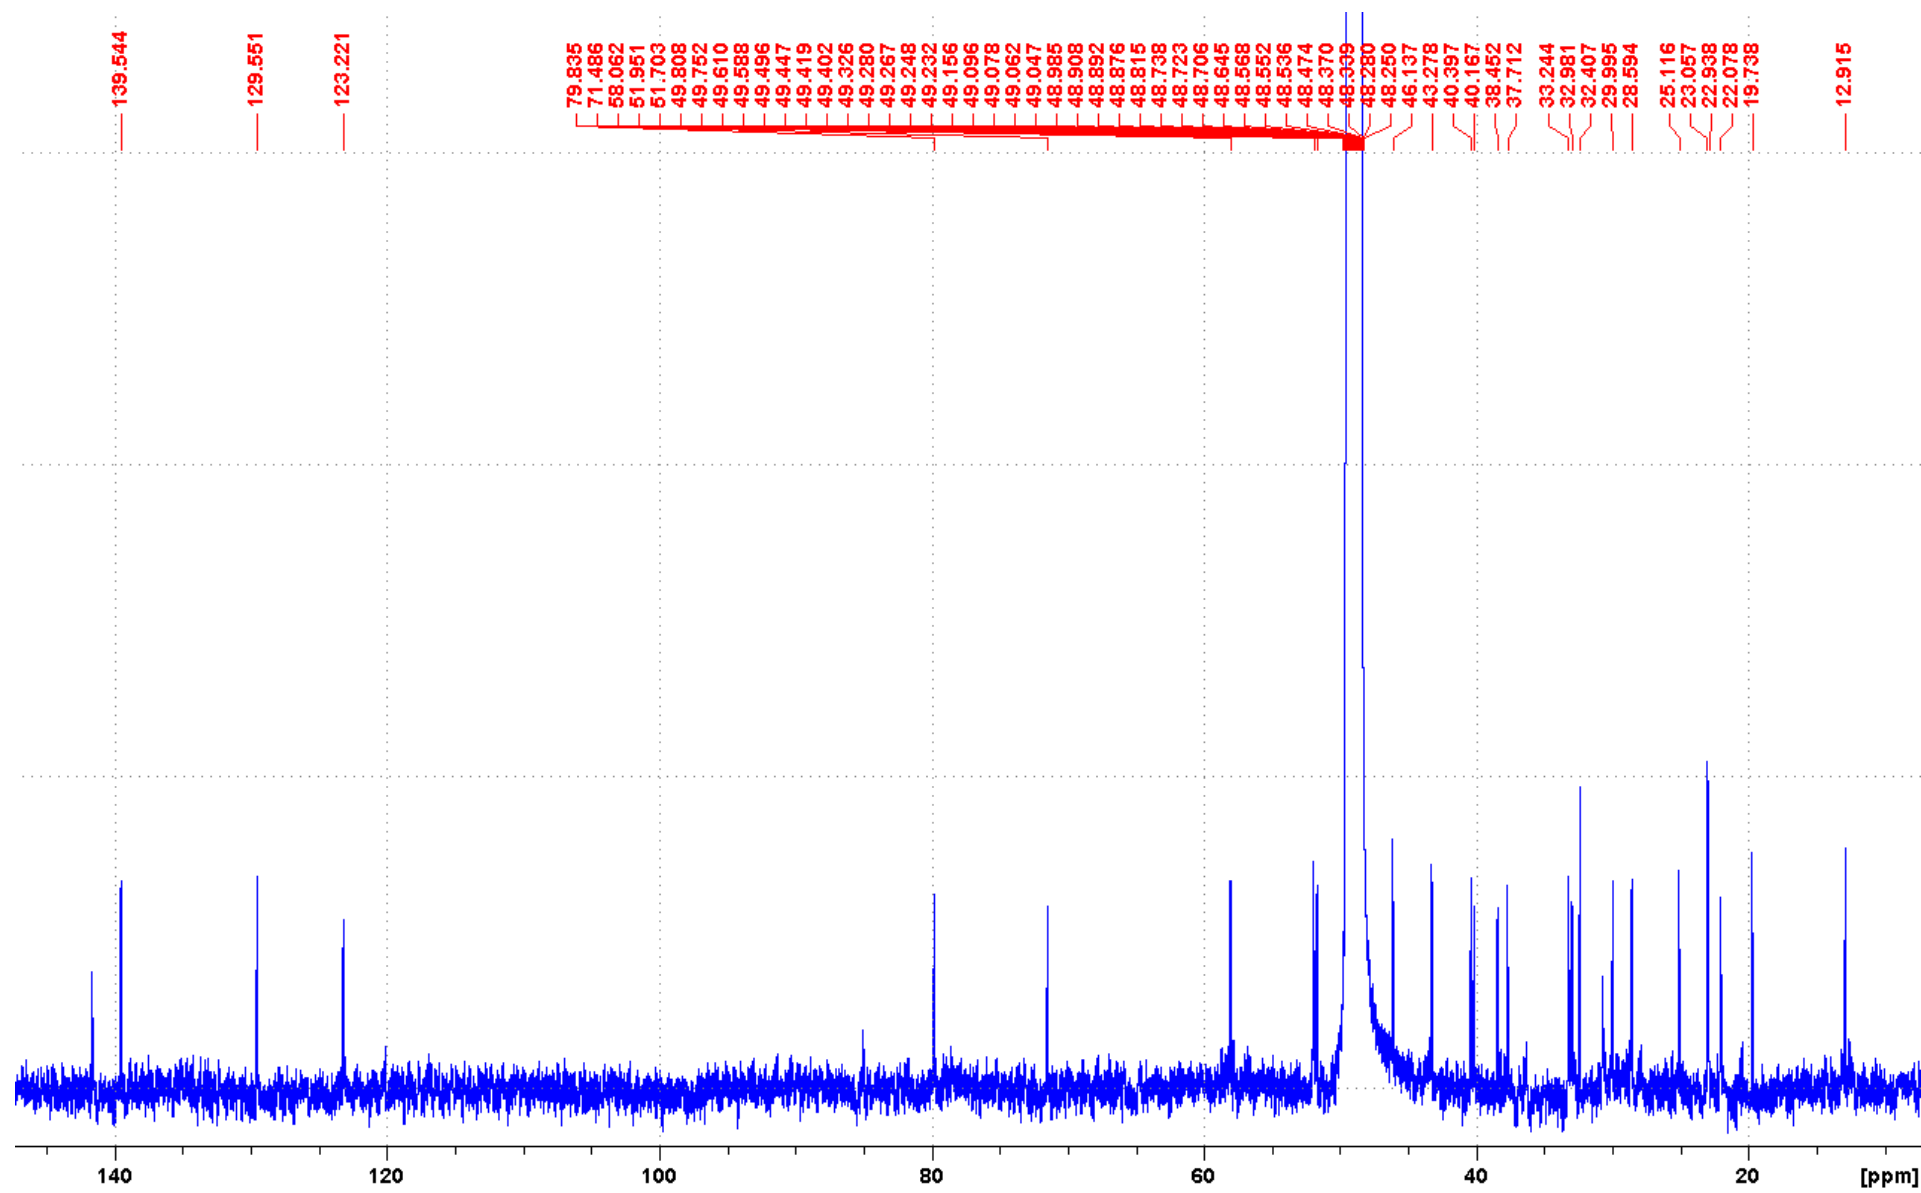

**Figure S4.**  $^1\text{H}$ - $^1\text{H}$  COSY (700.13 MHz,  $\text{CD}_3\text{OD}$ ) spectrum of compound **1**.

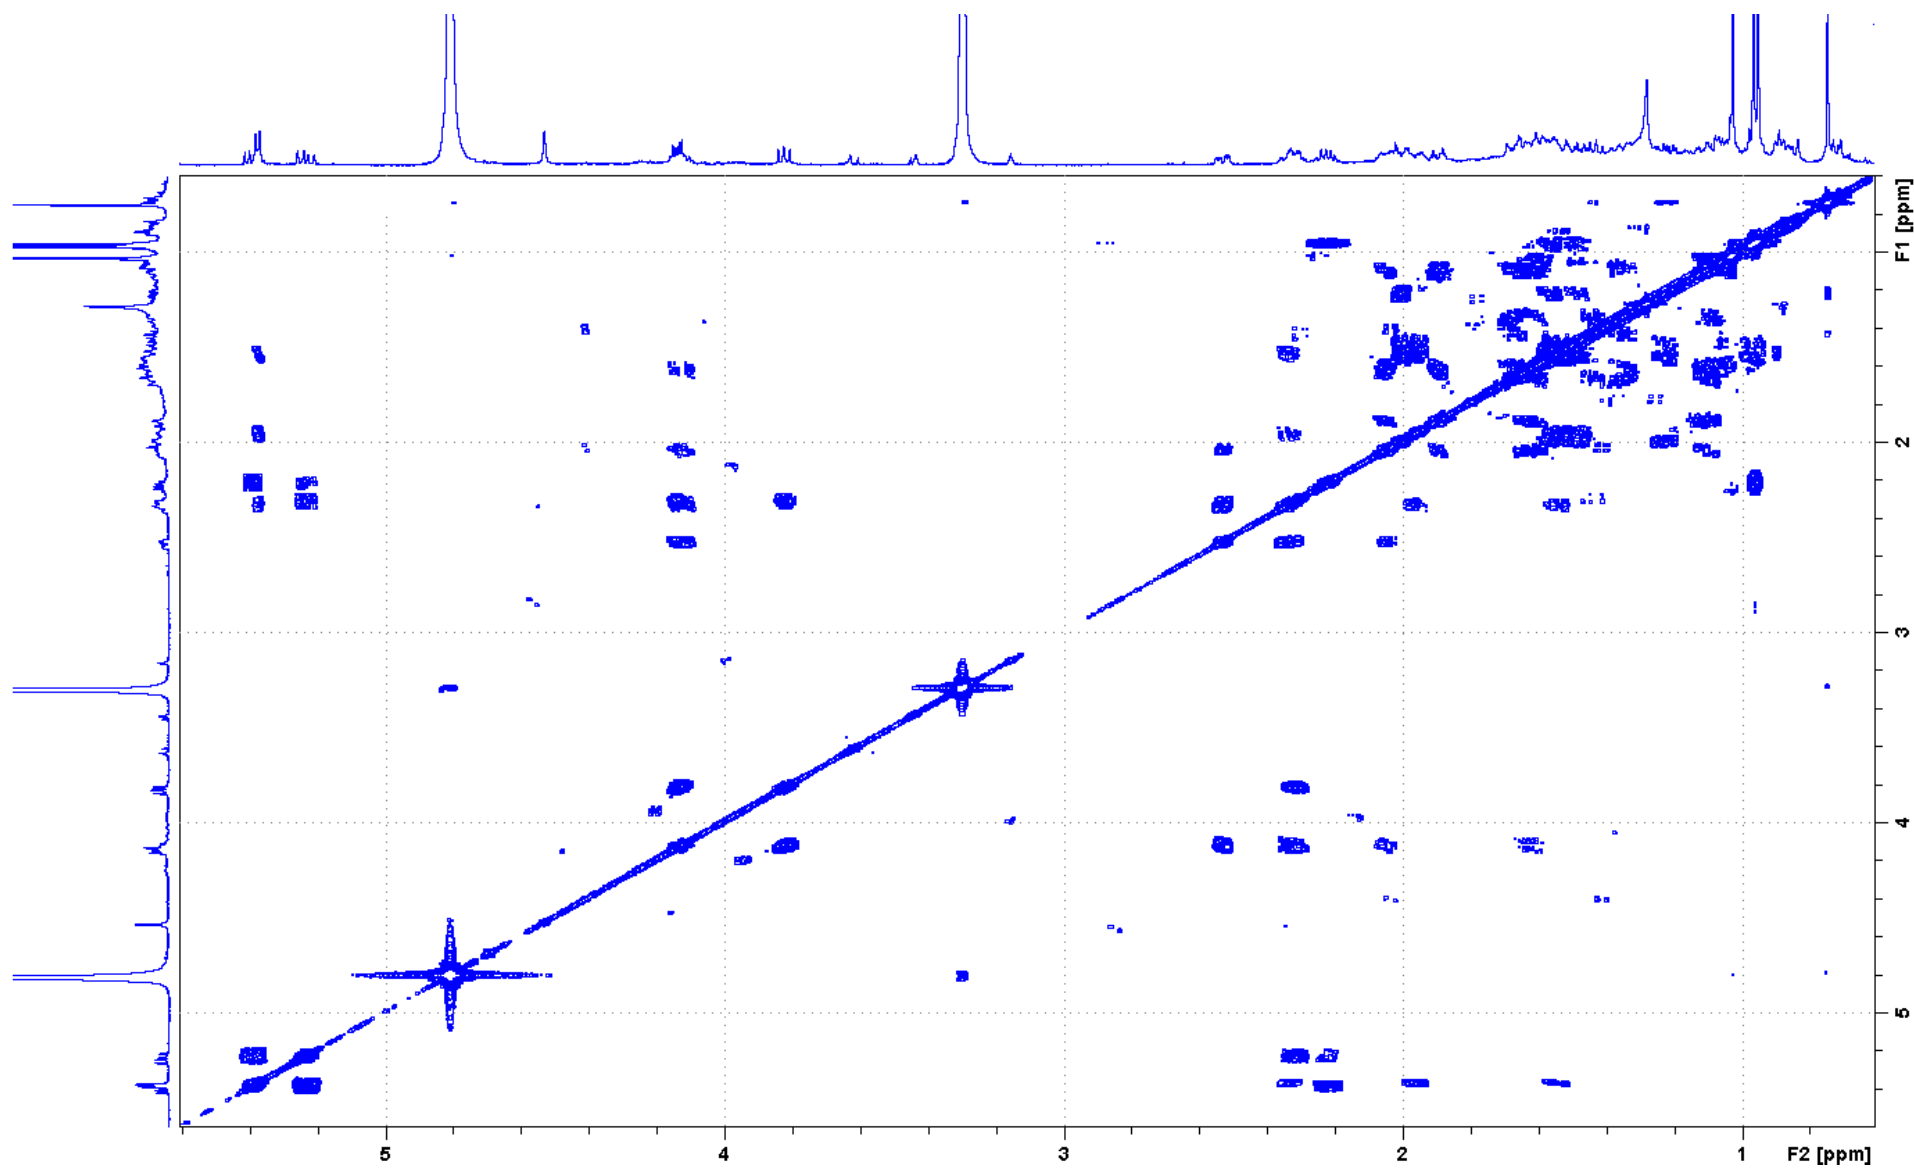

**Figure S5.** HSQC (700.13 MHz, CD<sub>3</sub>OD) spectrum of compound **1**.

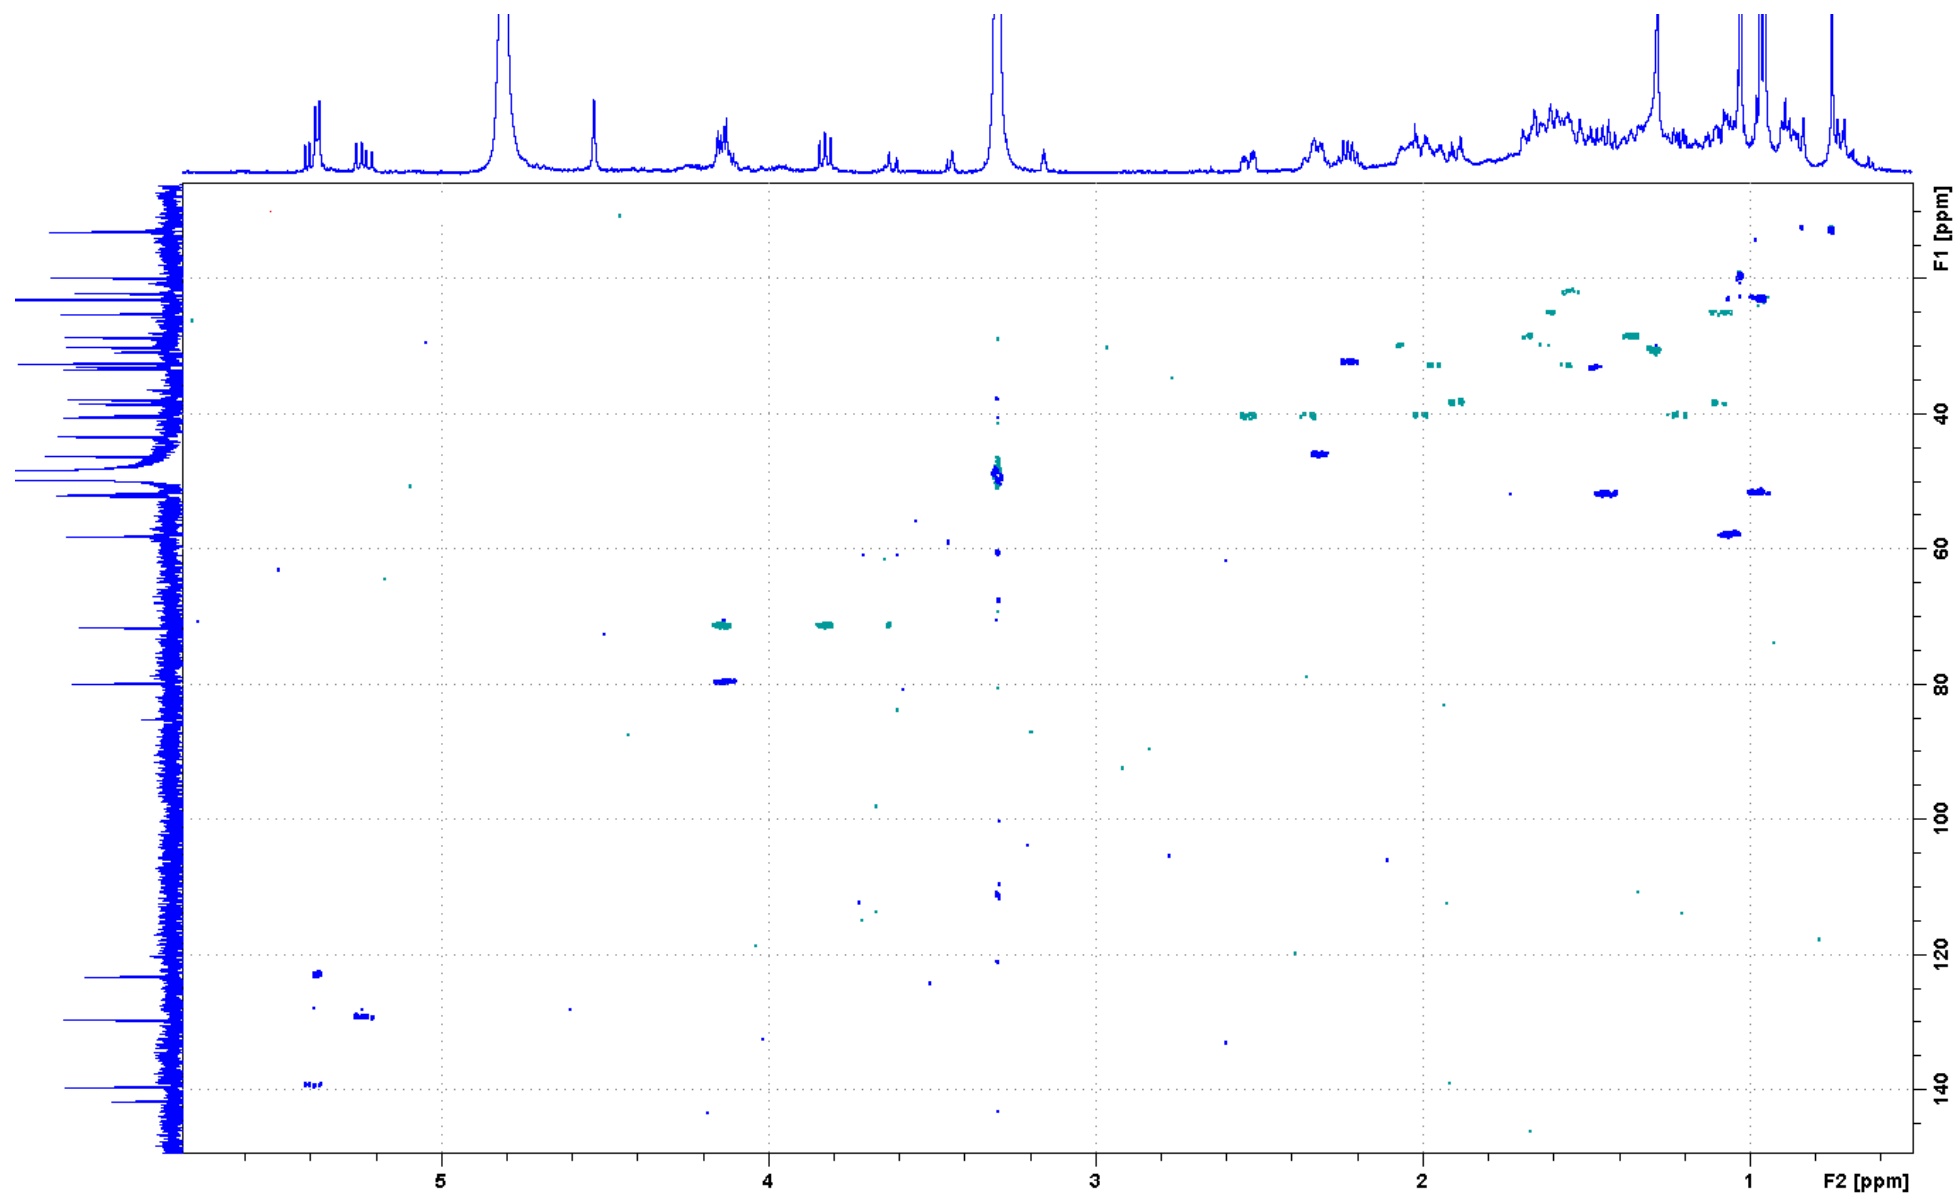



**Figure S6.** HMBC (700.13 MHz, CD<sub>3</sub>OD) spectrum of compound **1**.

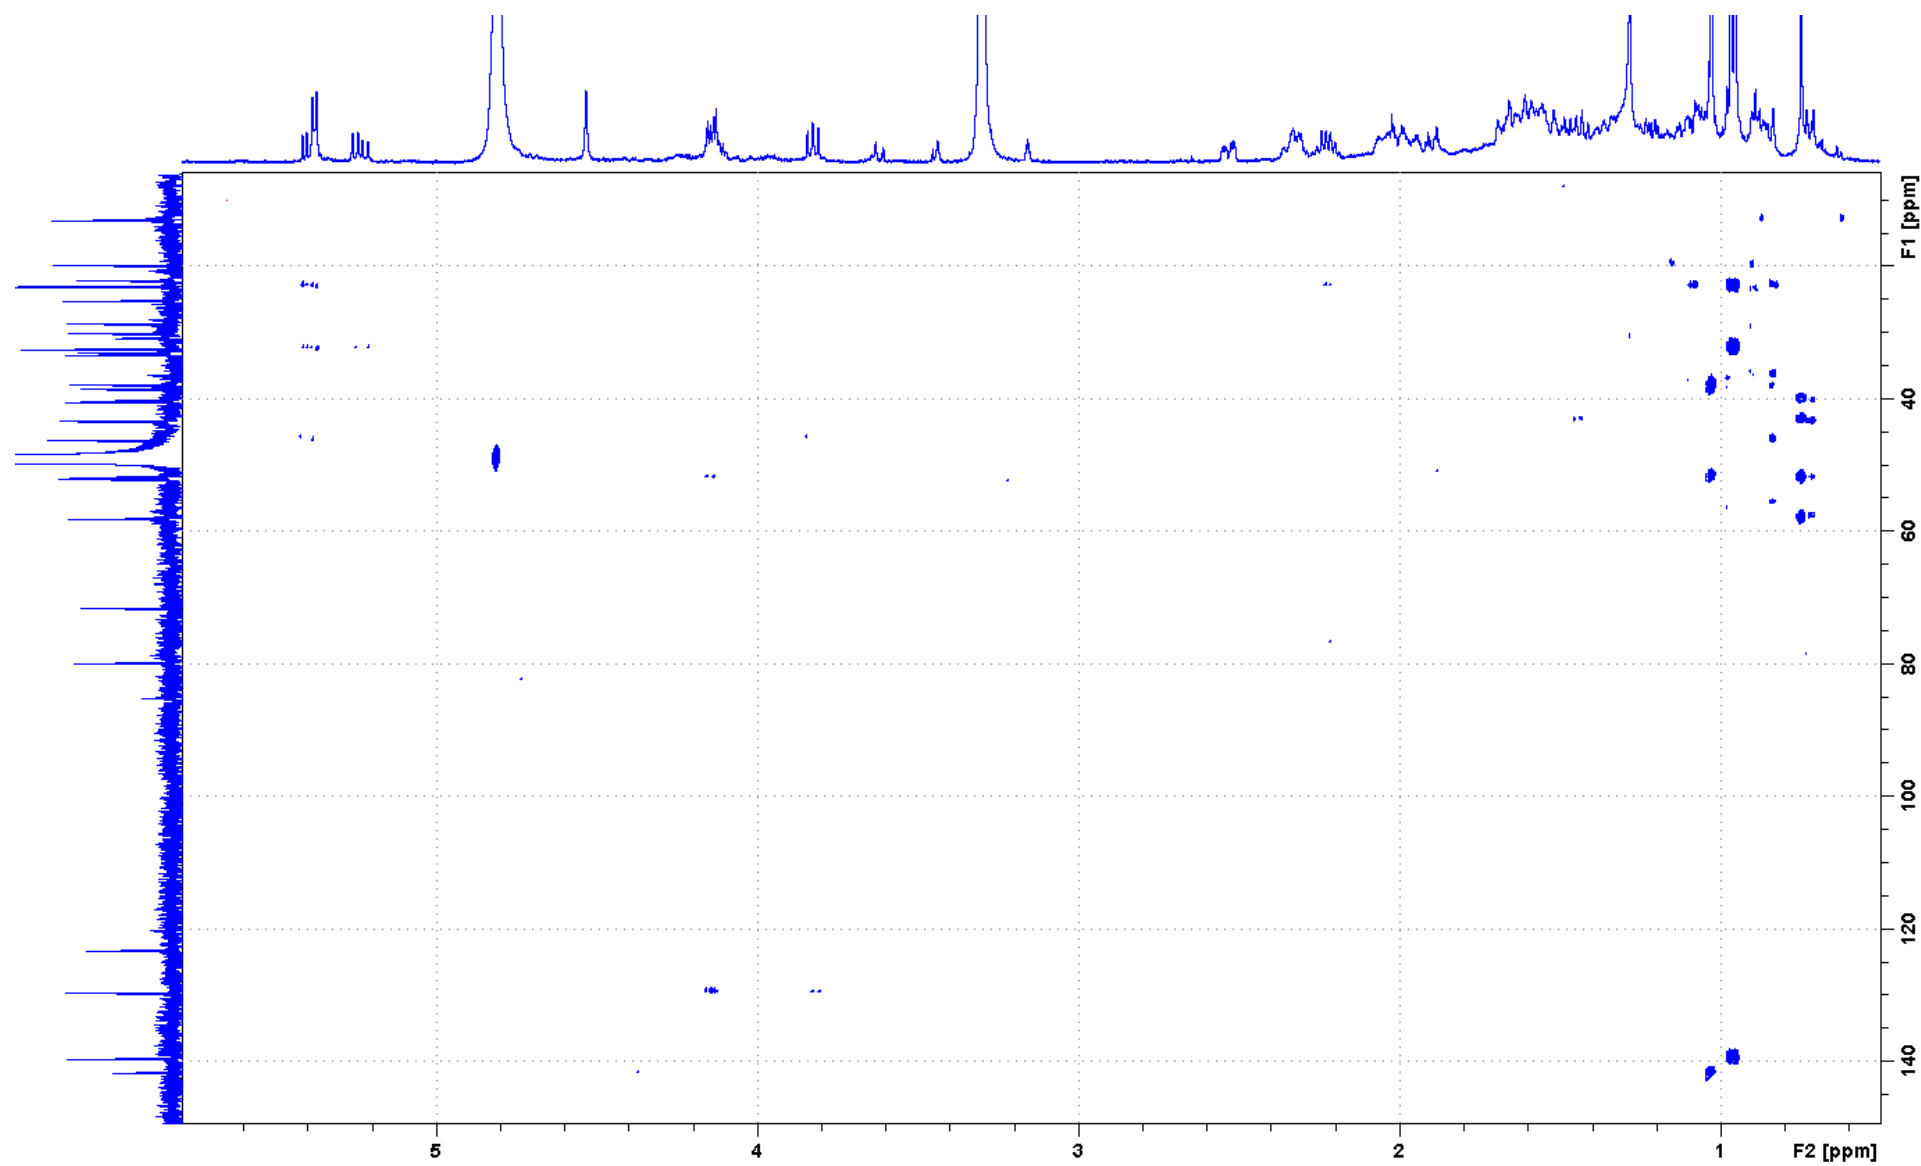

**Figure S7.** ROESY (700.13 MHz, CD<sub>3</sub>OD) spectrum of compound **1**.

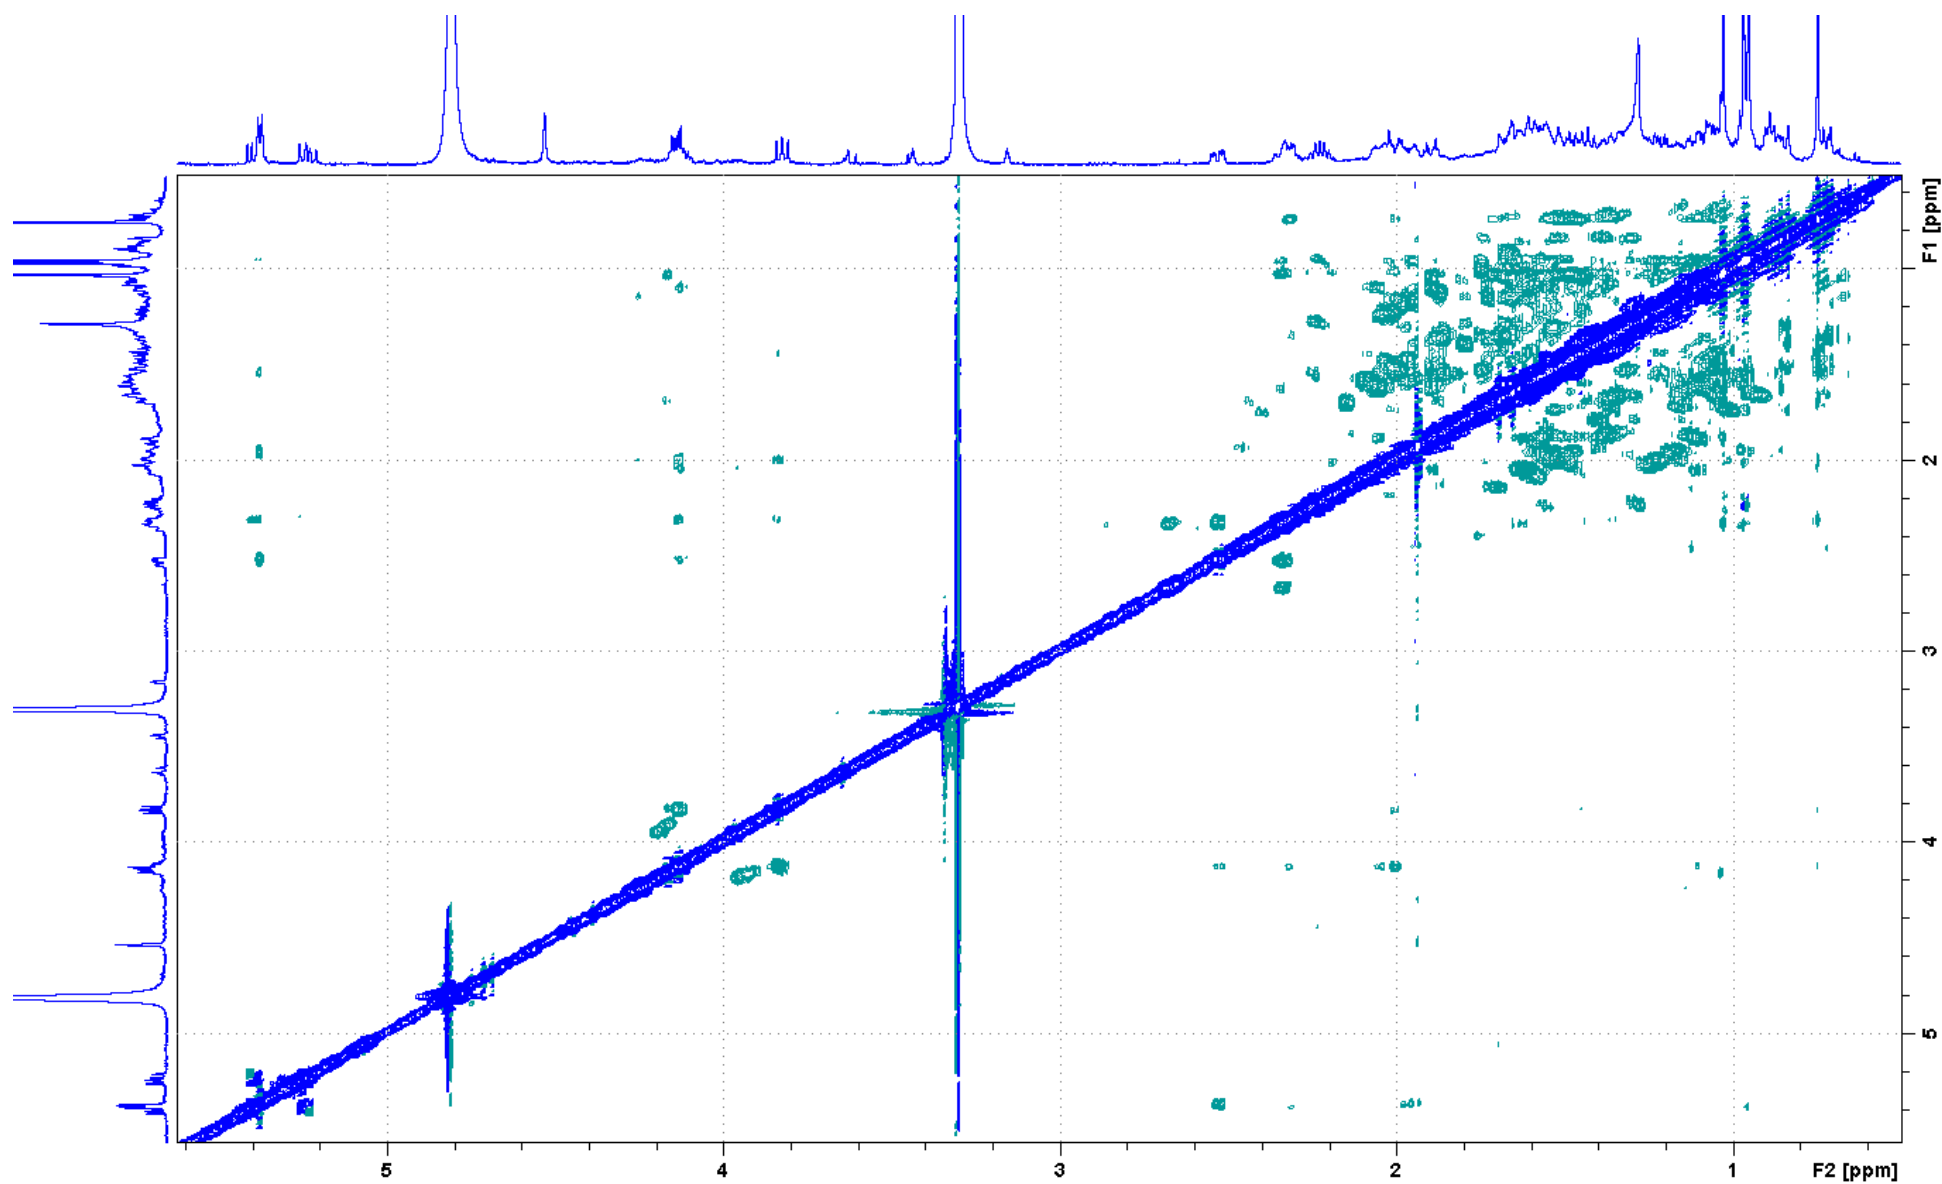

**Figure S8.** HRESIMS and HRESIMS/MS spectra of compound **2**.

(-)HRESIMS:  $[M - 2Na + H]^-$  and  $[M - 2Na]^{2-}$  ions

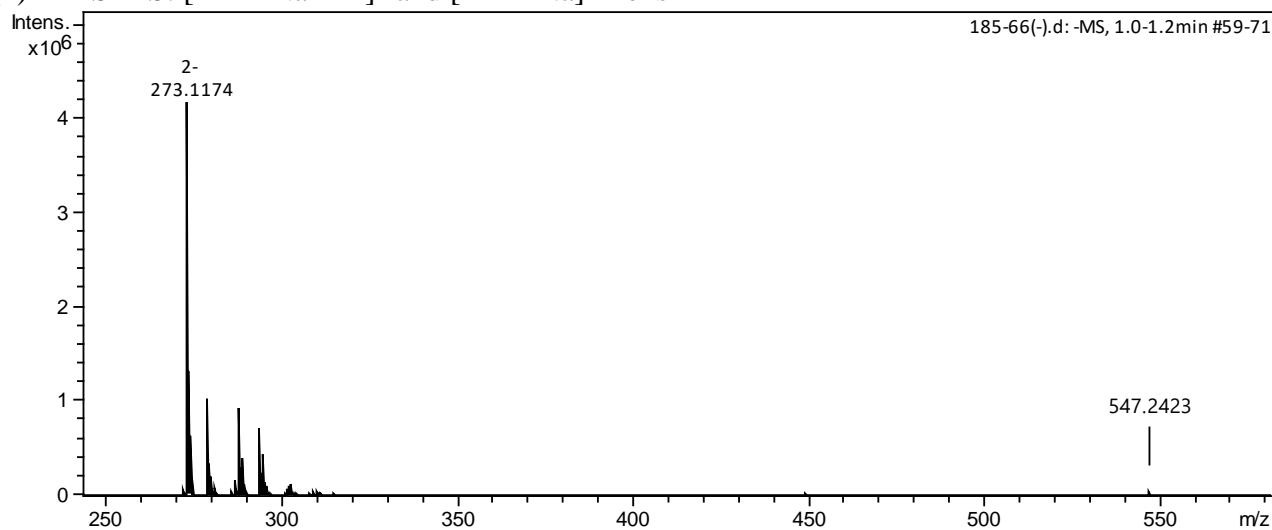

(+)HRESIMS:  $[M + Na]^+$  and  $[M + H]^+$  ions

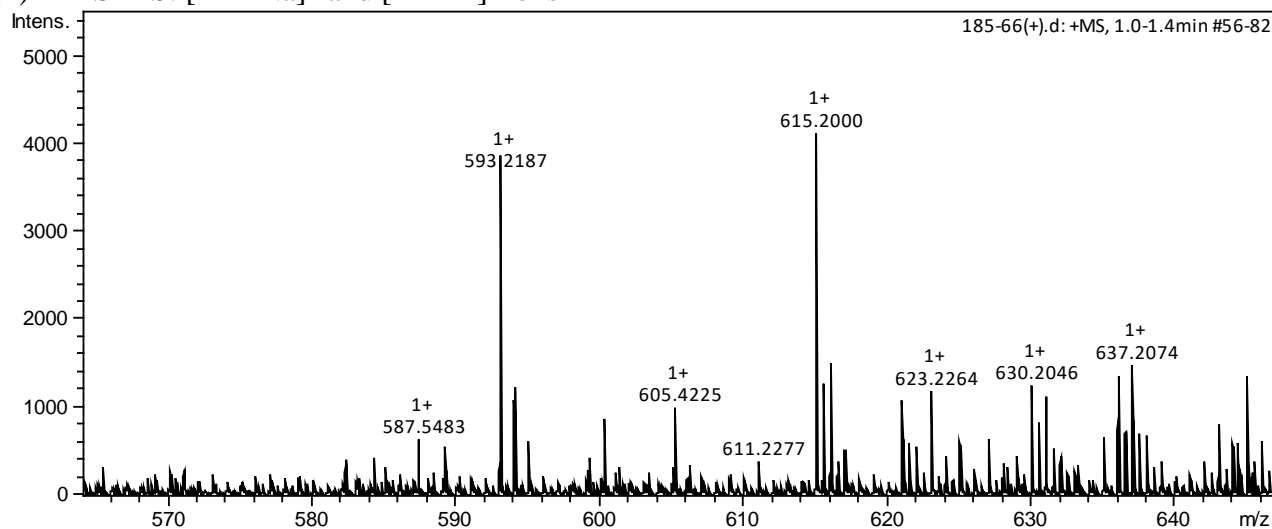

(-)HRESIMS/MS of the  $[M - 2Na]^{2-}$  ion at  $m/z$  273.1171

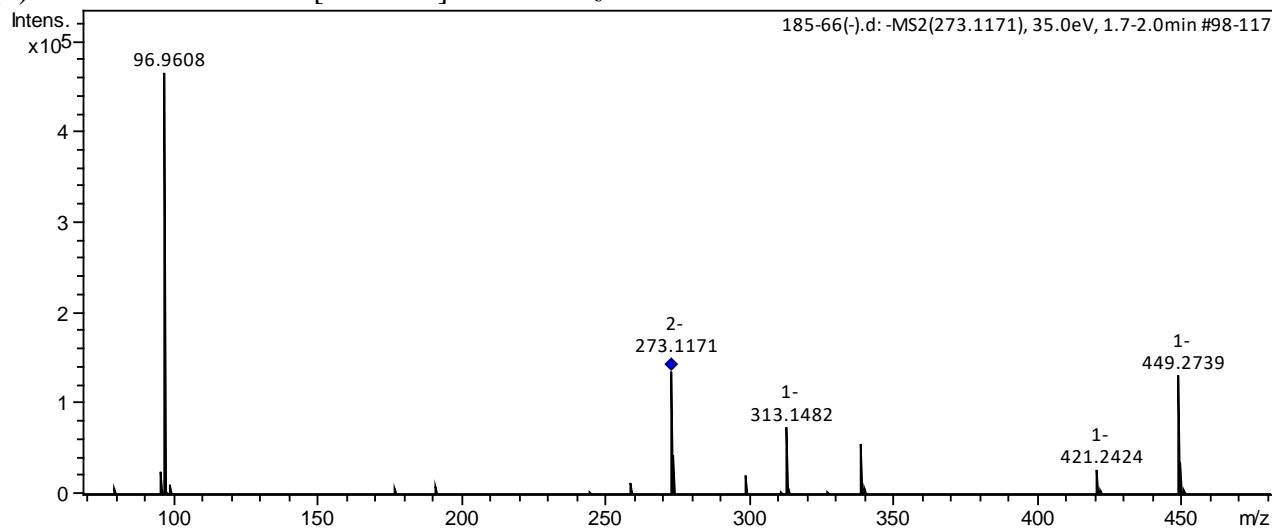

**Figure S9.**  $^1\text{H}$  NMR (700.13 MHz,  $\text{CD}_3\text{OD}$ ) spectrum of compound 2.

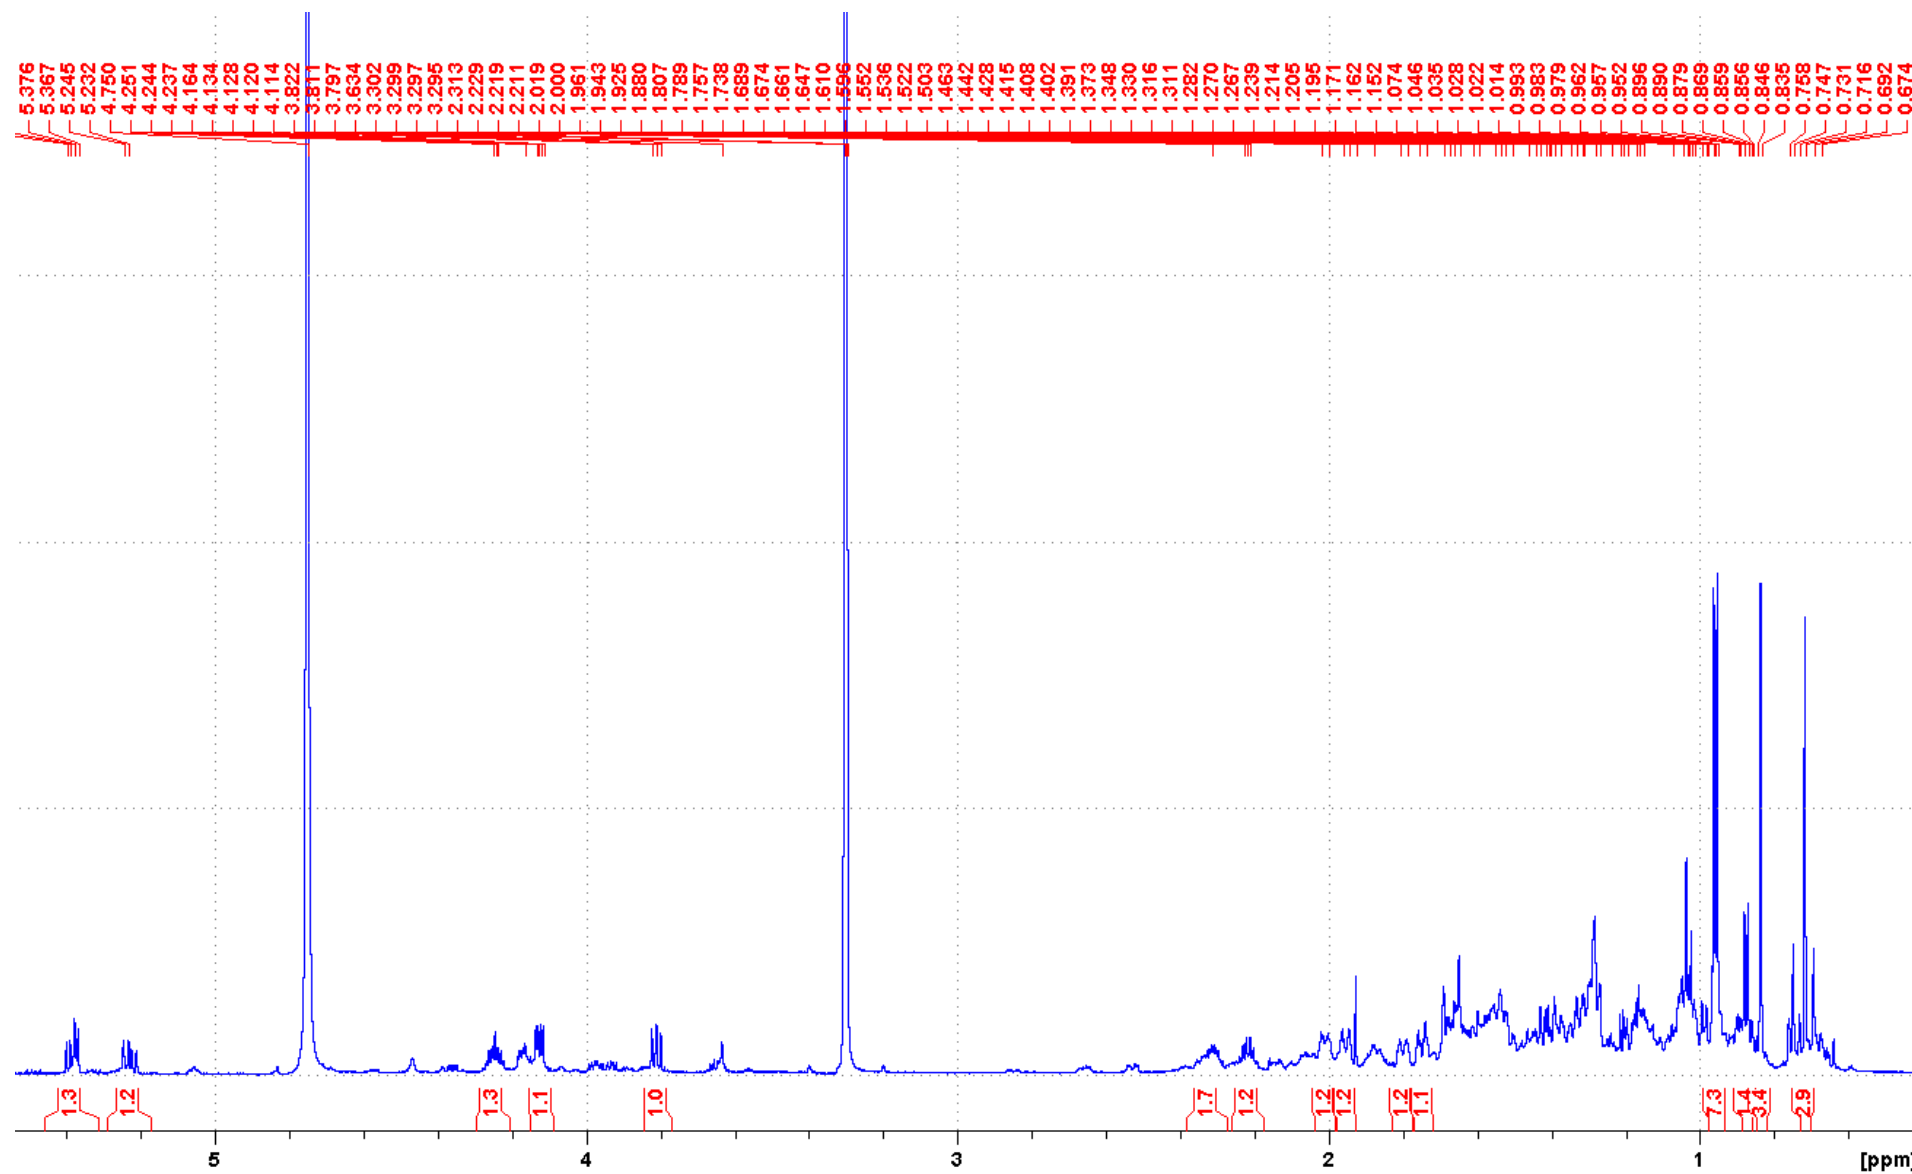

**Figure S10.**  $^{13}\text{C}$  NMR (176.04 MHz,  $\text{CD}_3\text{OD}$ ) spectrum of compound **2**.

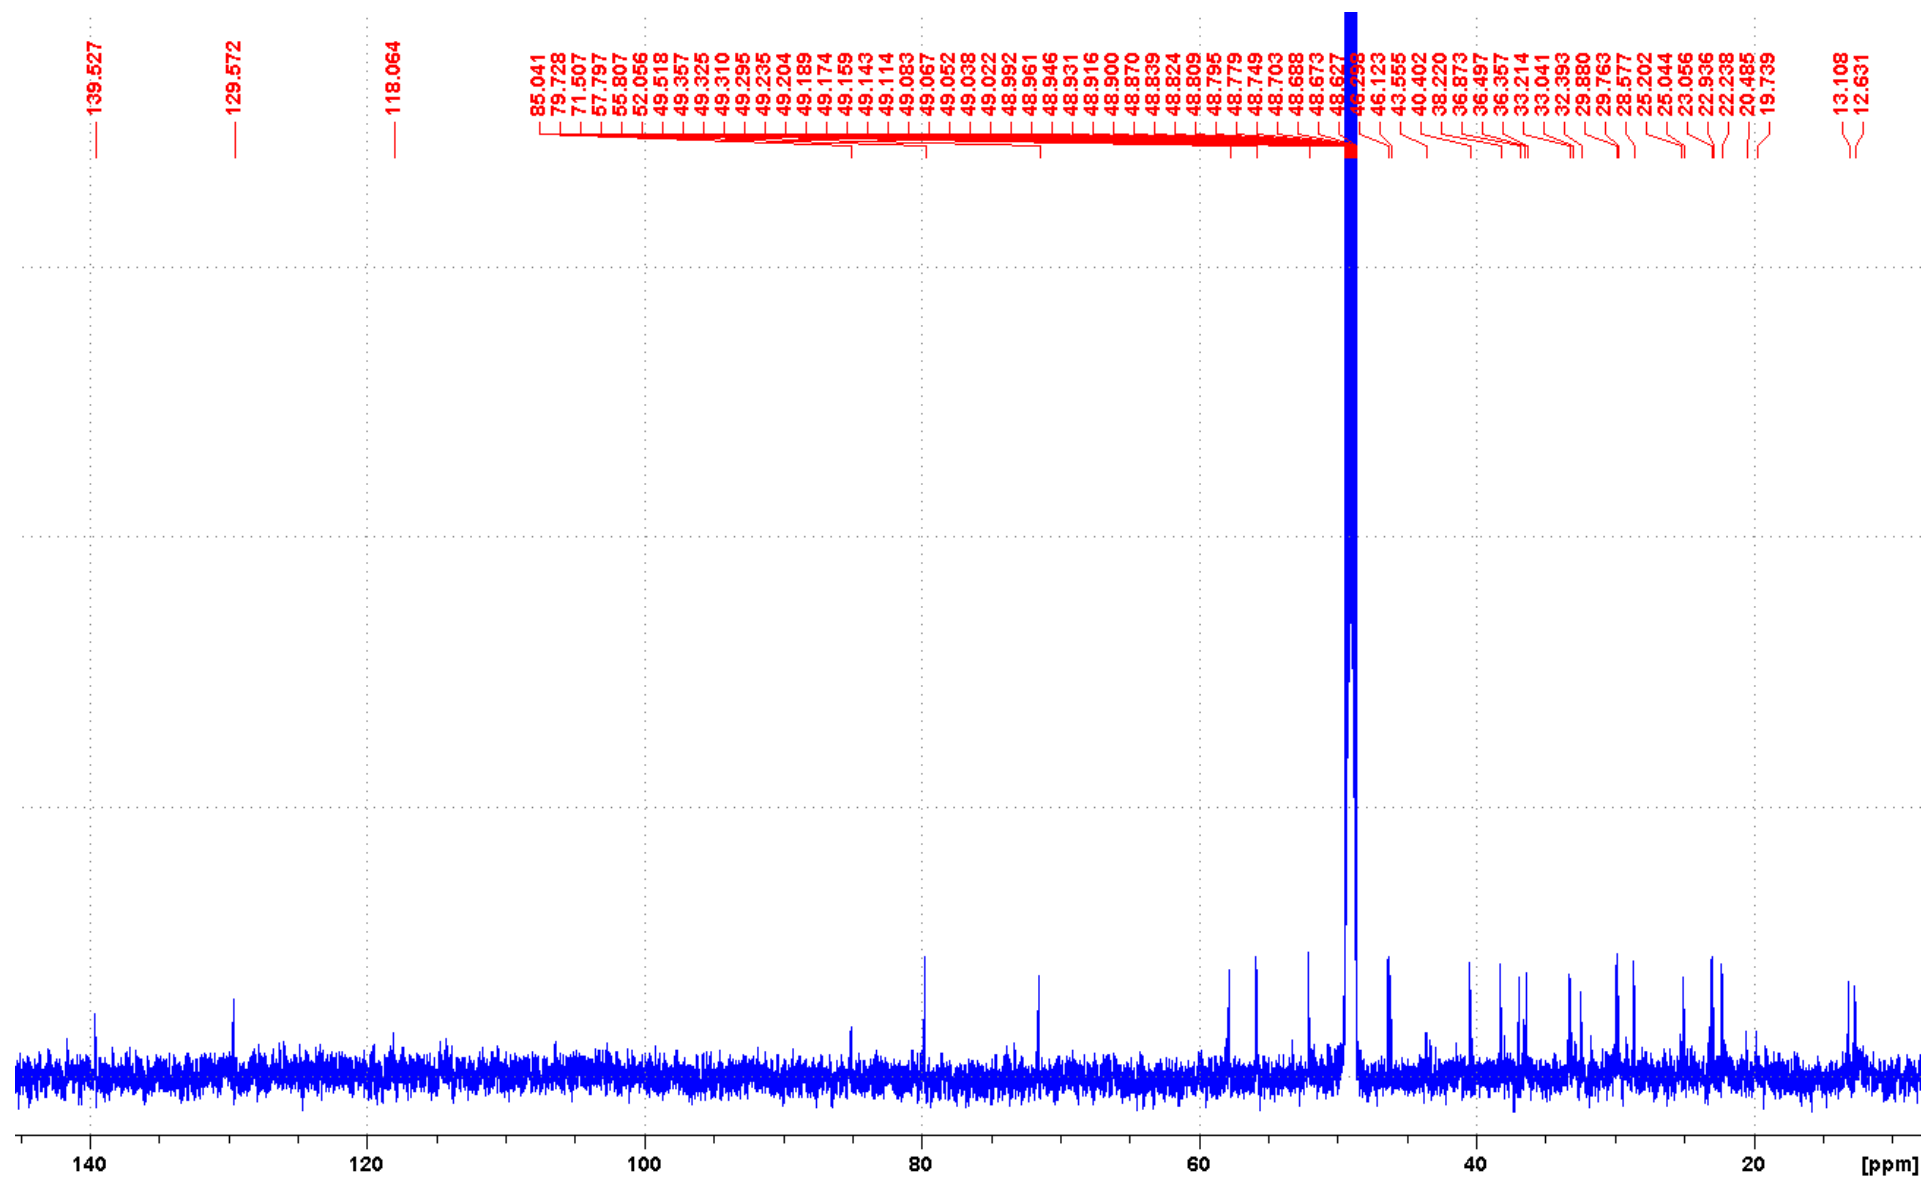

**Figure S11.**  $^1\text{H}$ - $^1\text{H}$  COSY (700.13 MHz,  $\text{CD}_3\text{OD}$ ) spectrum of compound **2**.

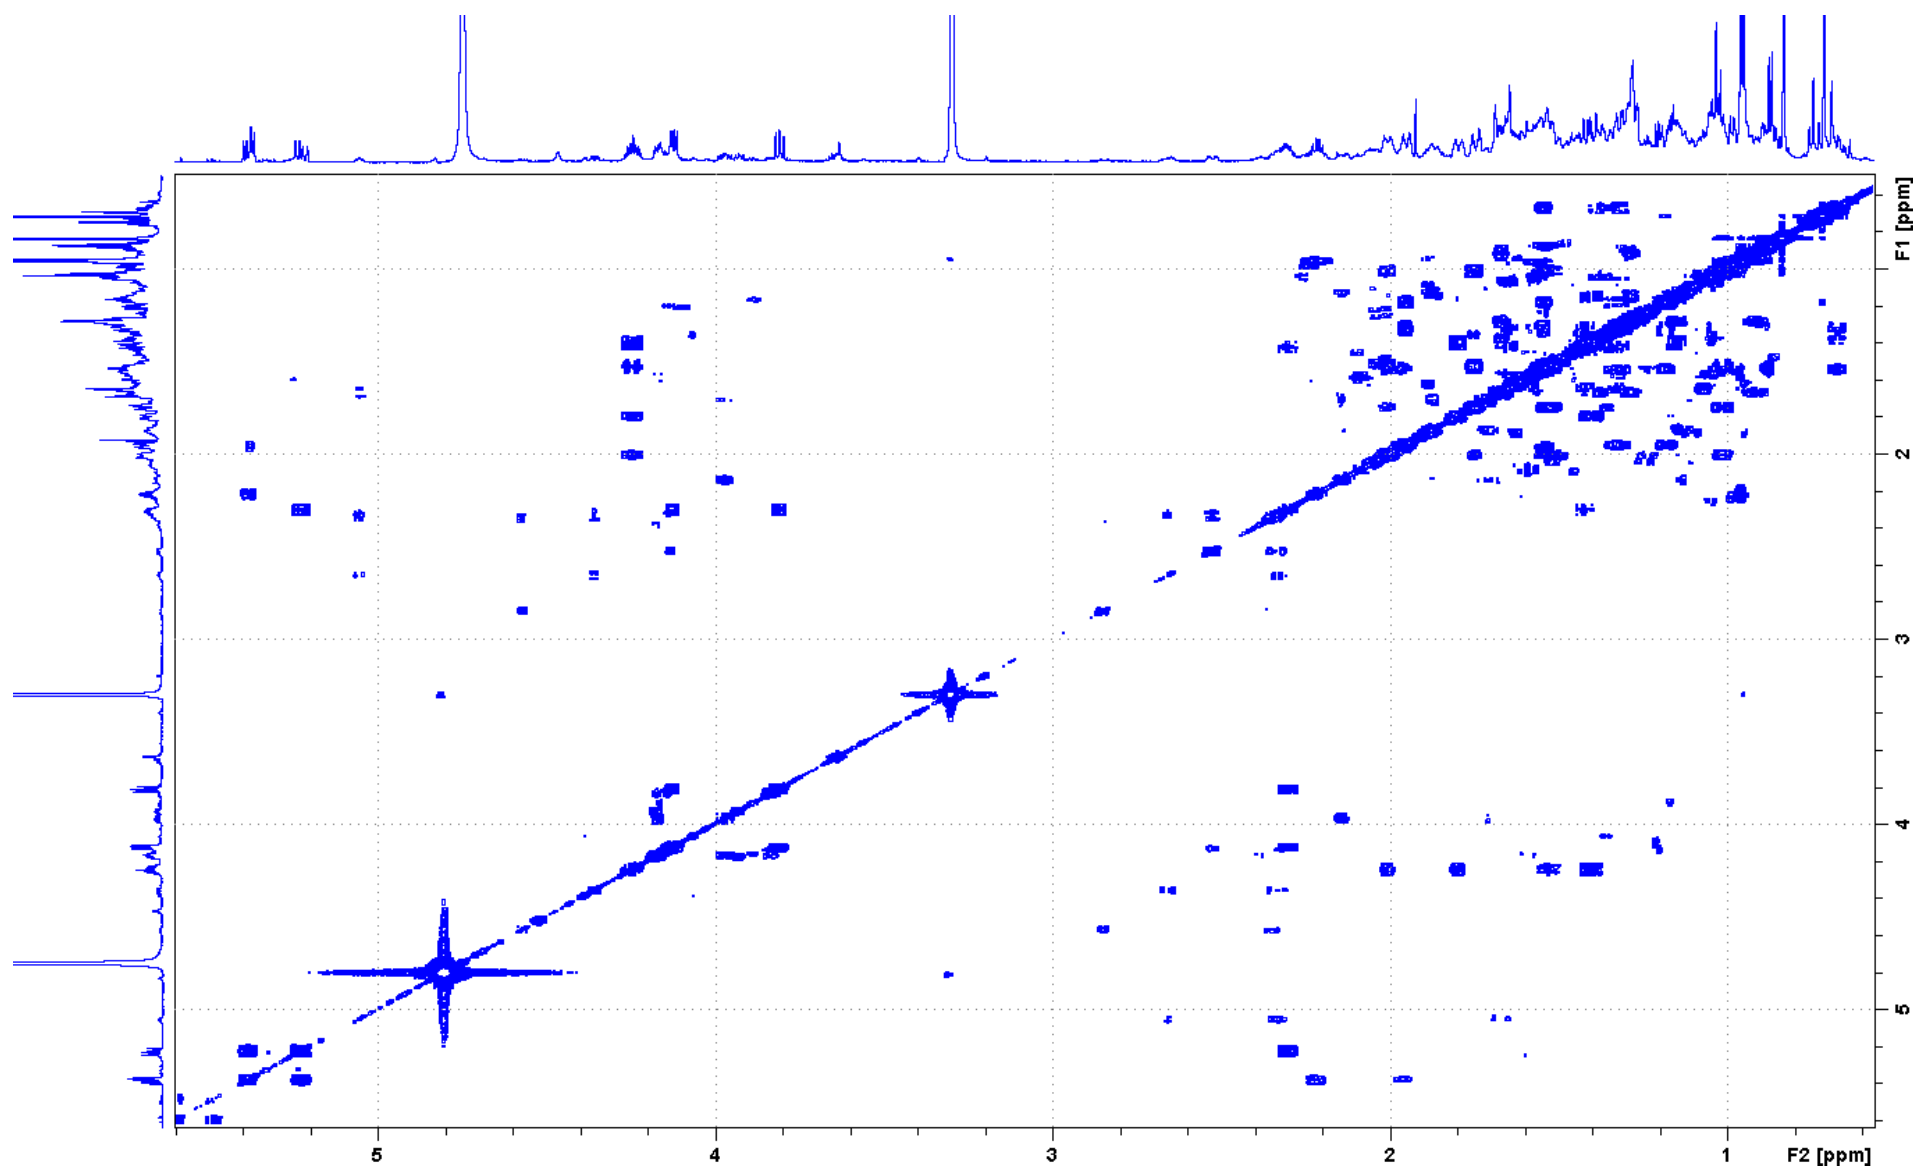

**Figure S12.** HSQC (700.13 MHz, CD<sub>3</sub>OD) spectrum of compound **2**.

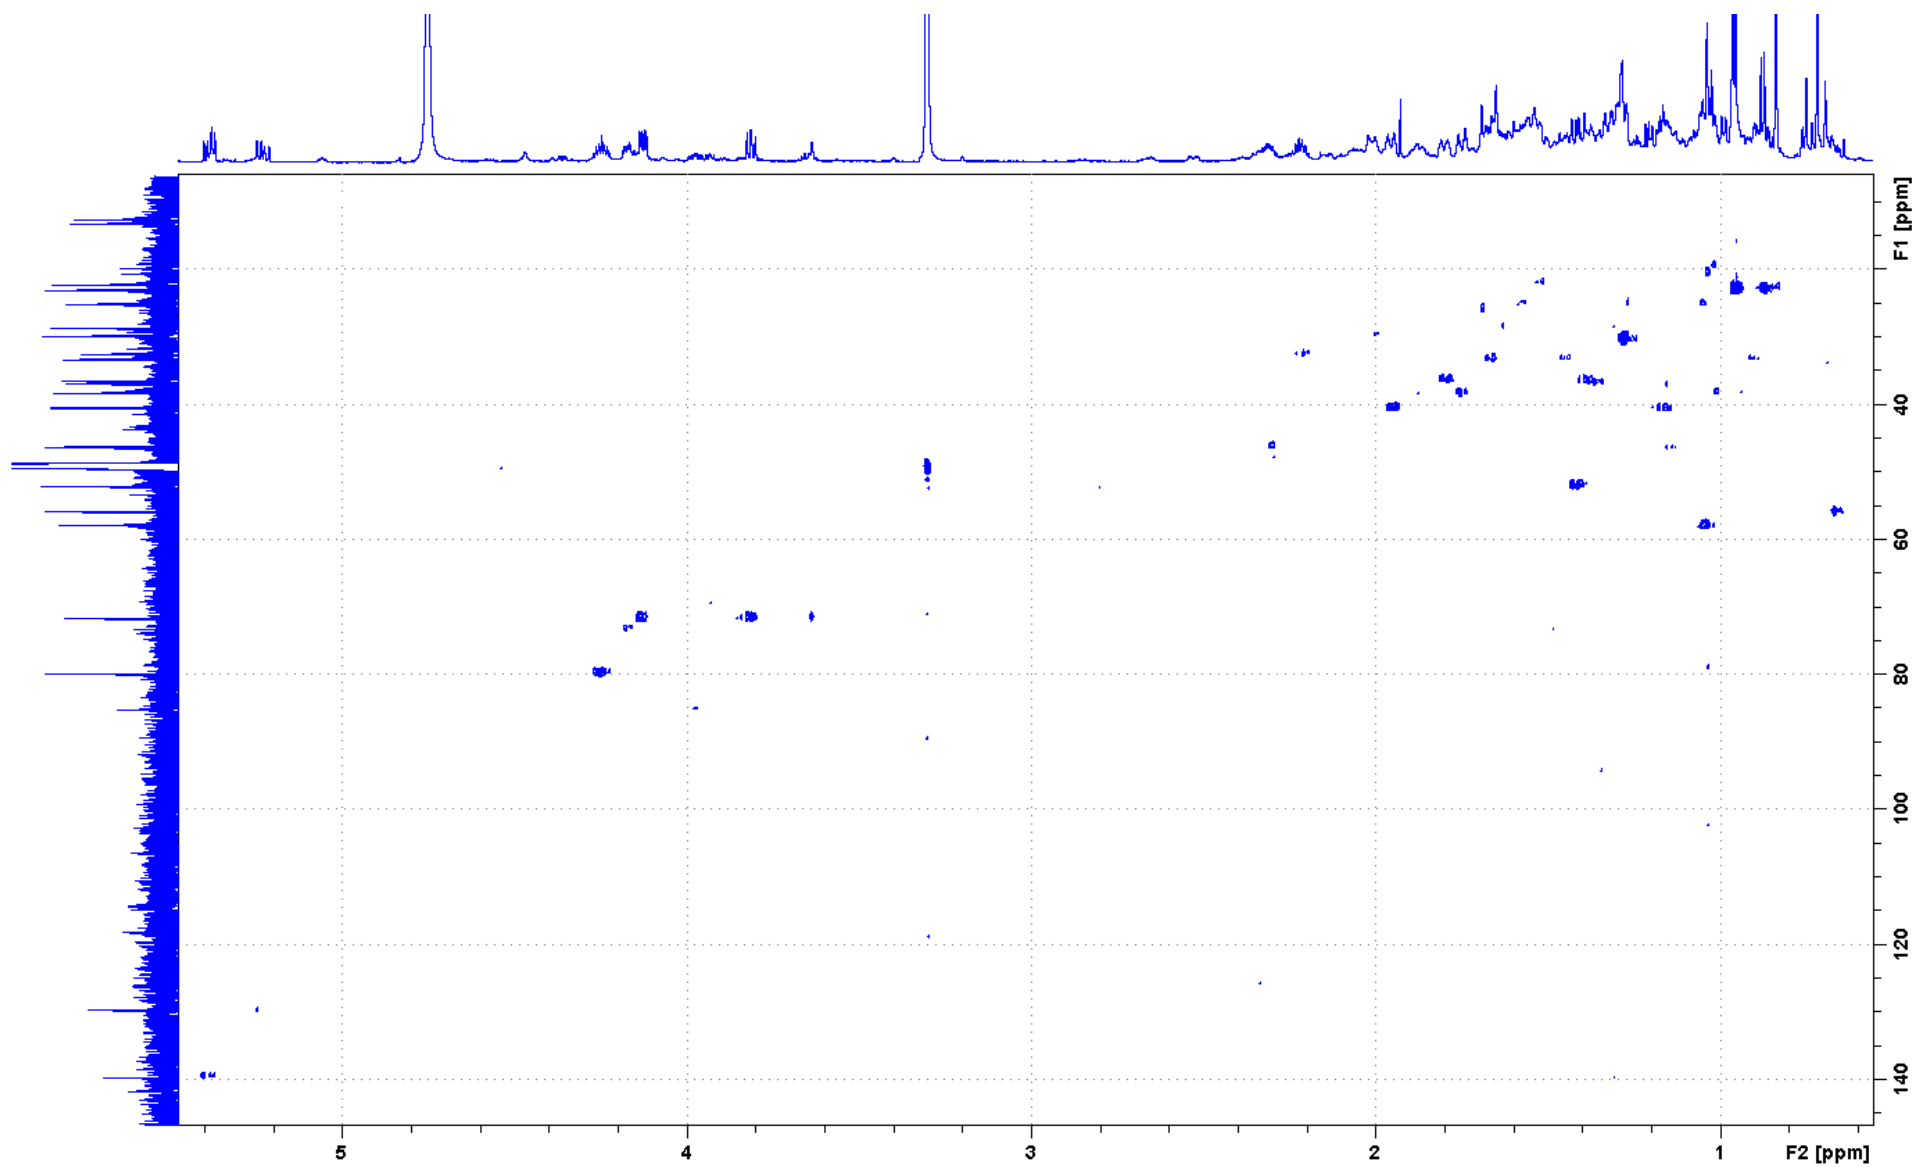

**Figure S13.** HMBC (700.13 MHz, CD<sub>3</sub>OD) spectrum of compound **2**.

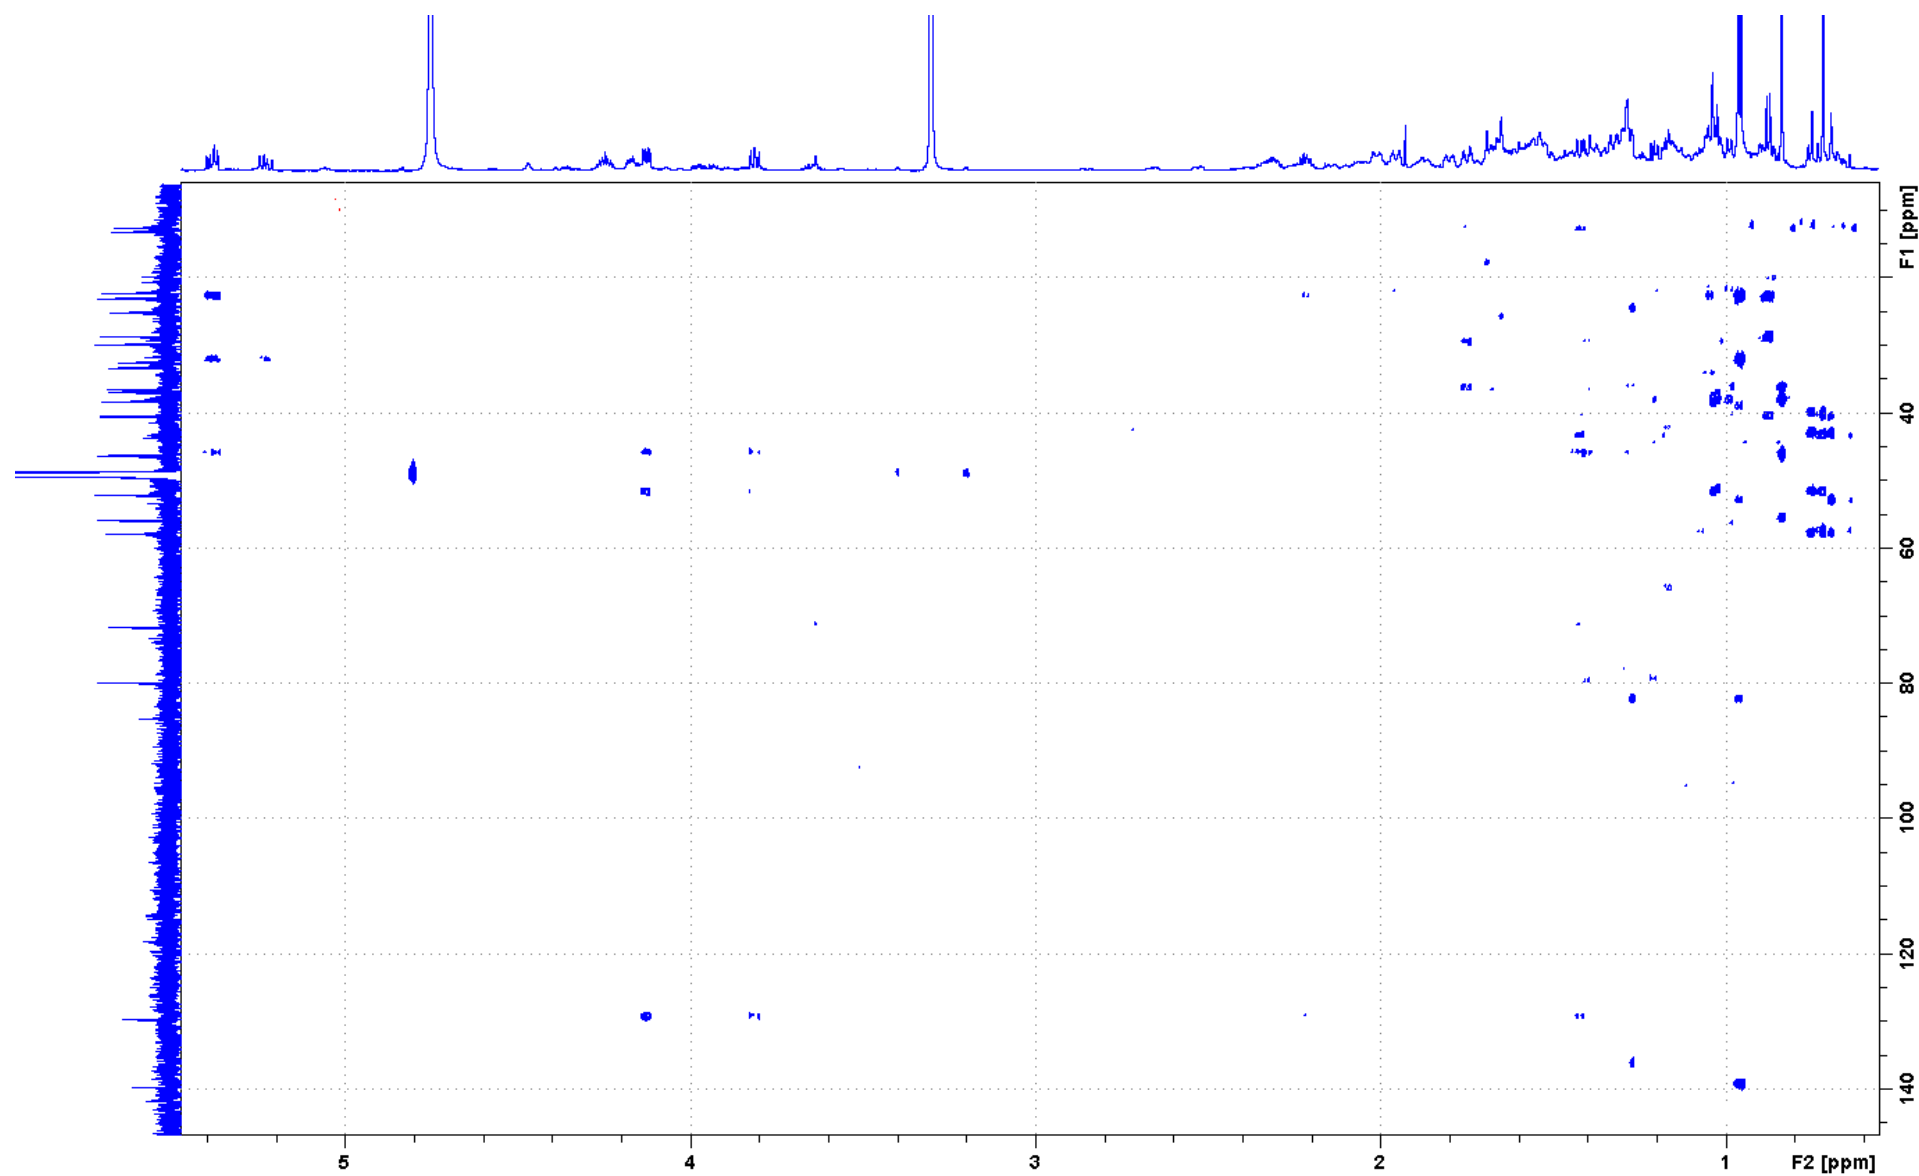



**Figure S14.** ROESY (700.13 MHz, CD<sub>3</sub>OD) spectrum of compound **2**.

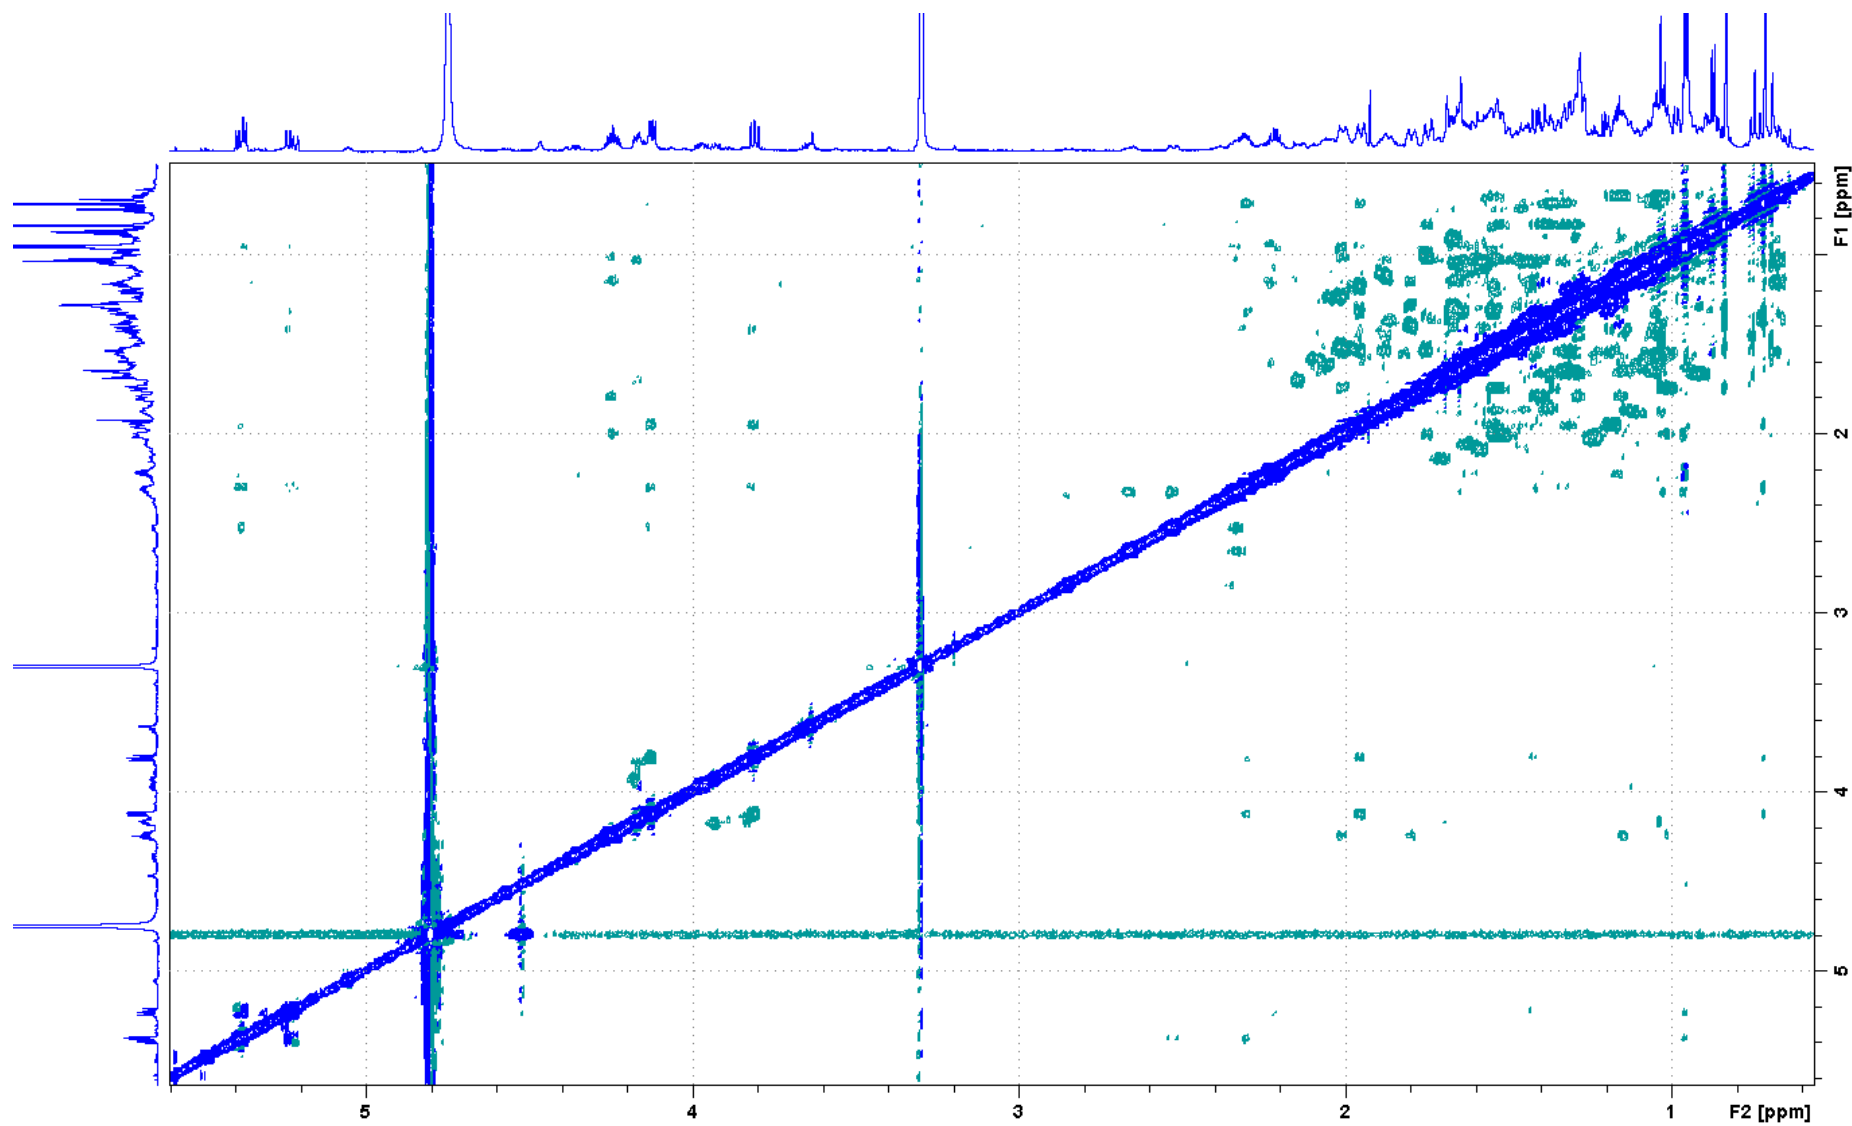

**Figure S15.** HRESIMS and HRESIMS/MS spectra of compound **3**.

(-)HRESIMS:  $[M - Na]^-$  and  $[M - 2Na]^{2-}$  ions

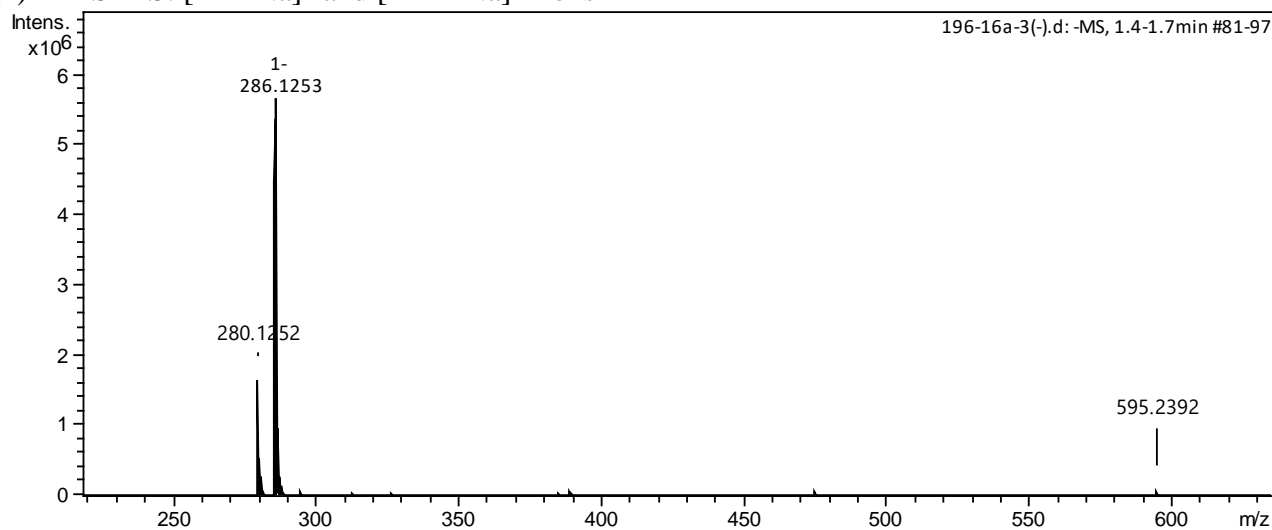

(+)HRESIMS:  $[M + Na]^+$  ion

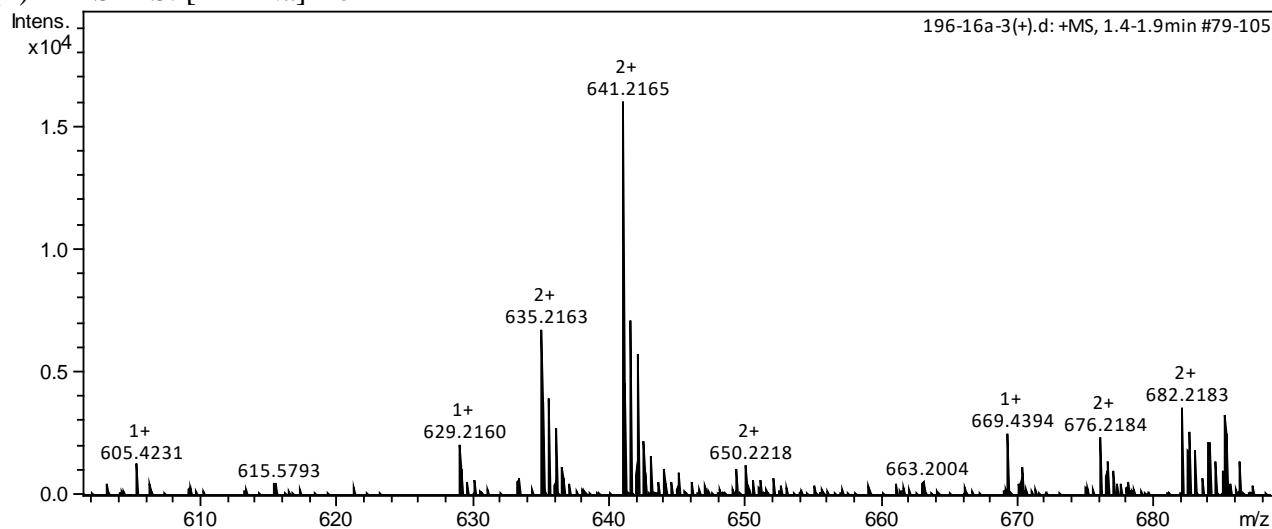

(-)HRESIMS/MS of the  $[M - 2Na]^{2-}$  ion at  $m/z$  286.1254

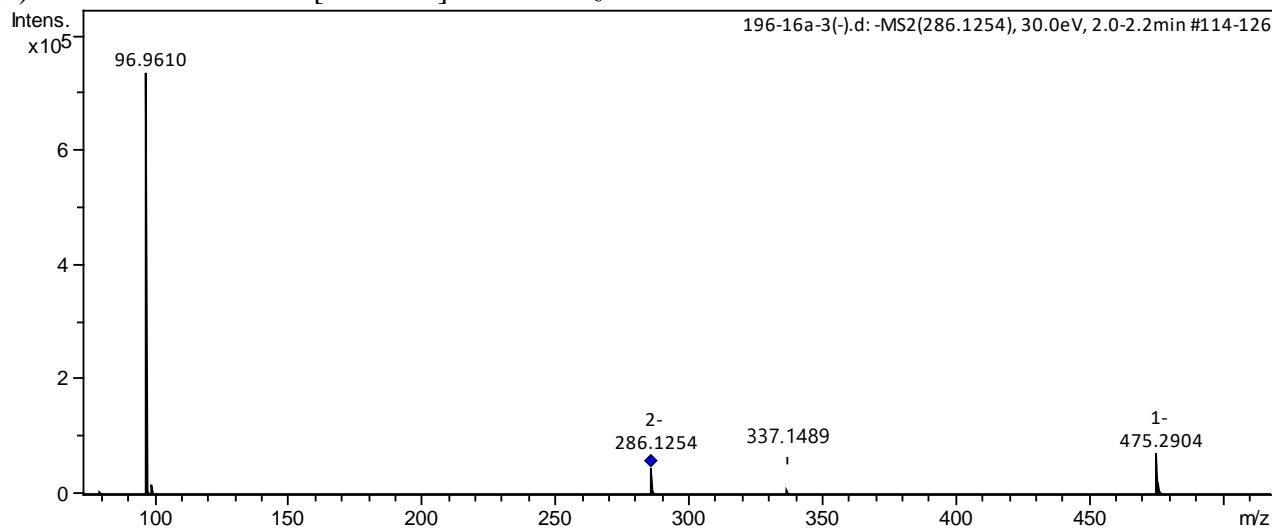

**Figure S16.**  $^1\text{H}$  NMR (700.13 MHz,  $\text{CD}_3\text{OD}$ ) spectrum of compound **3**.

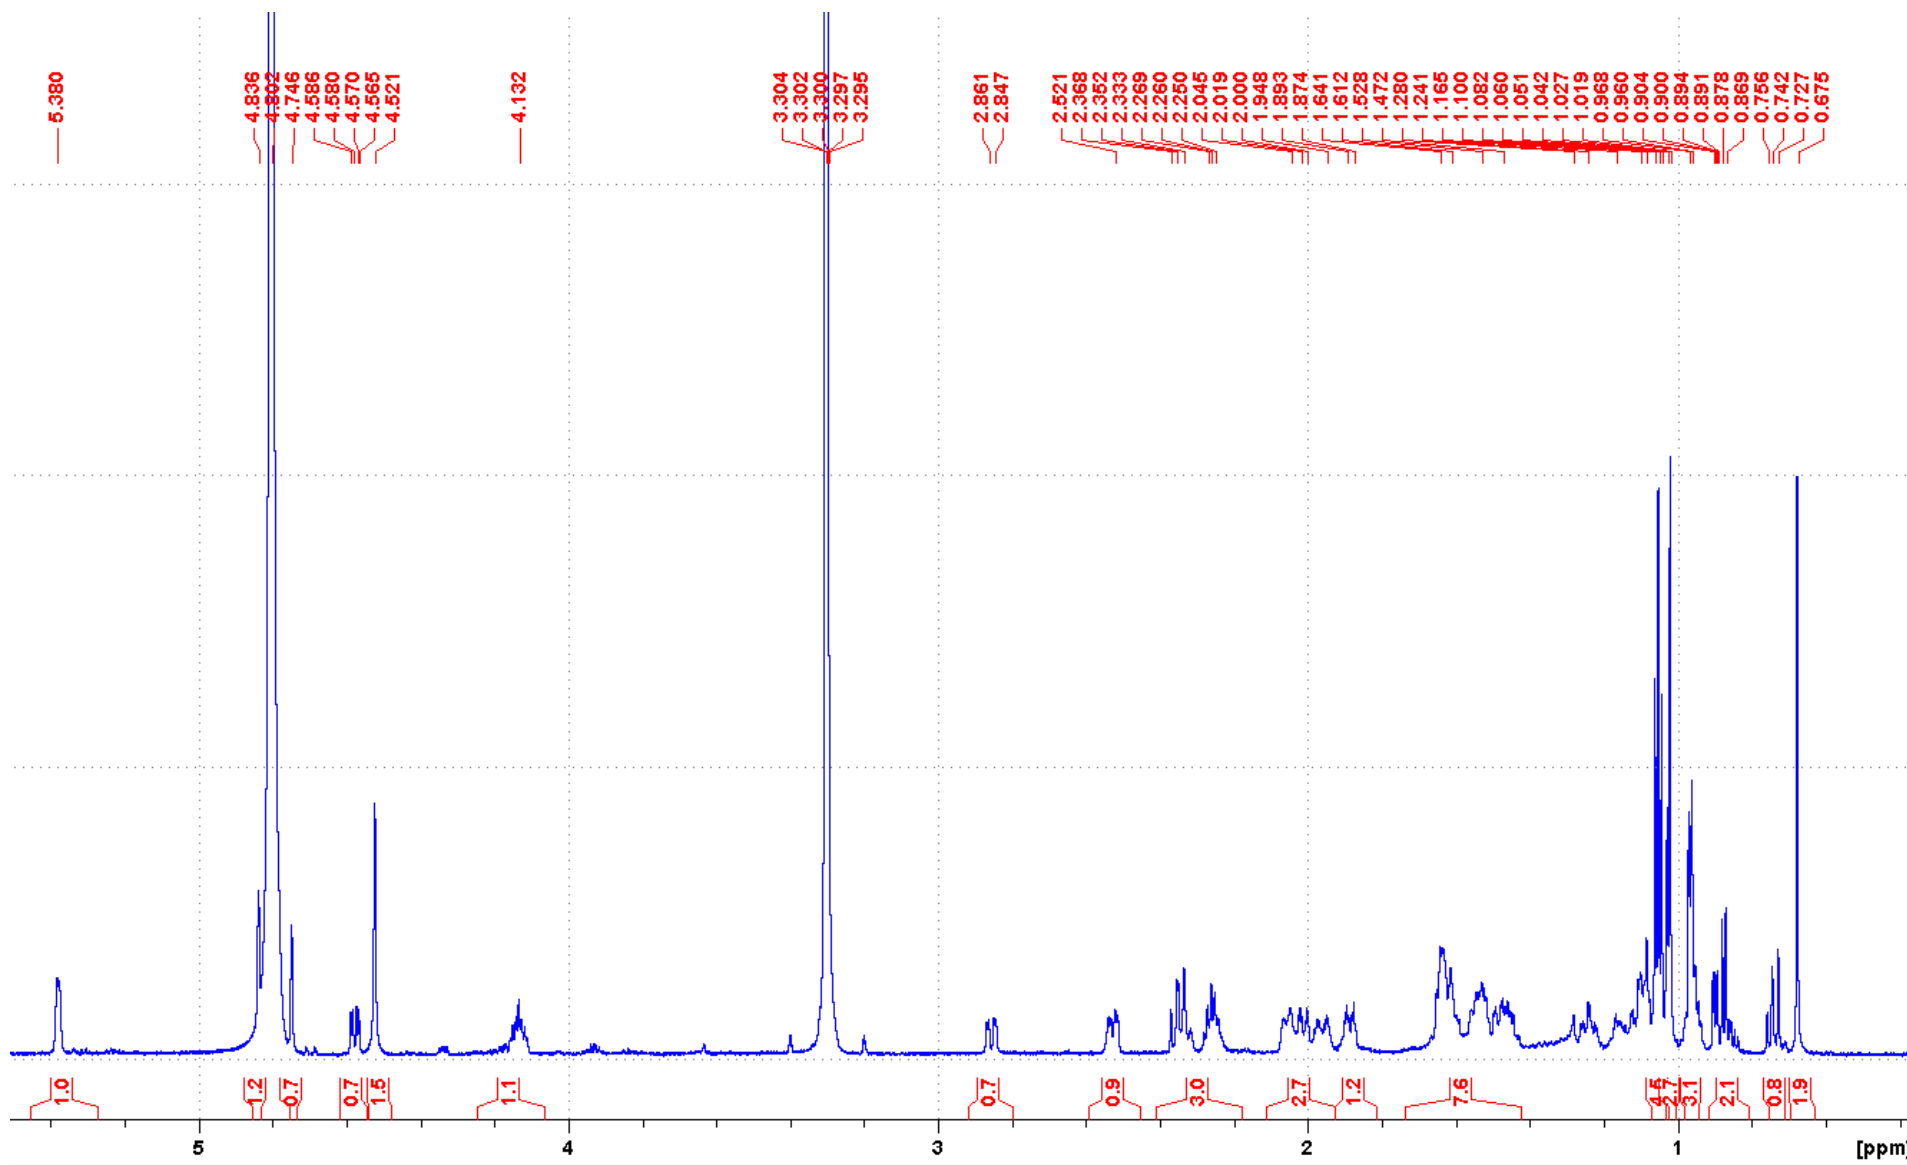

**Figure S17.**  $^{13}\text{C}$  NMR (176.04 MHz,  $\text{CD}_3\text{OD}$ ) spectrum of compound **3**.

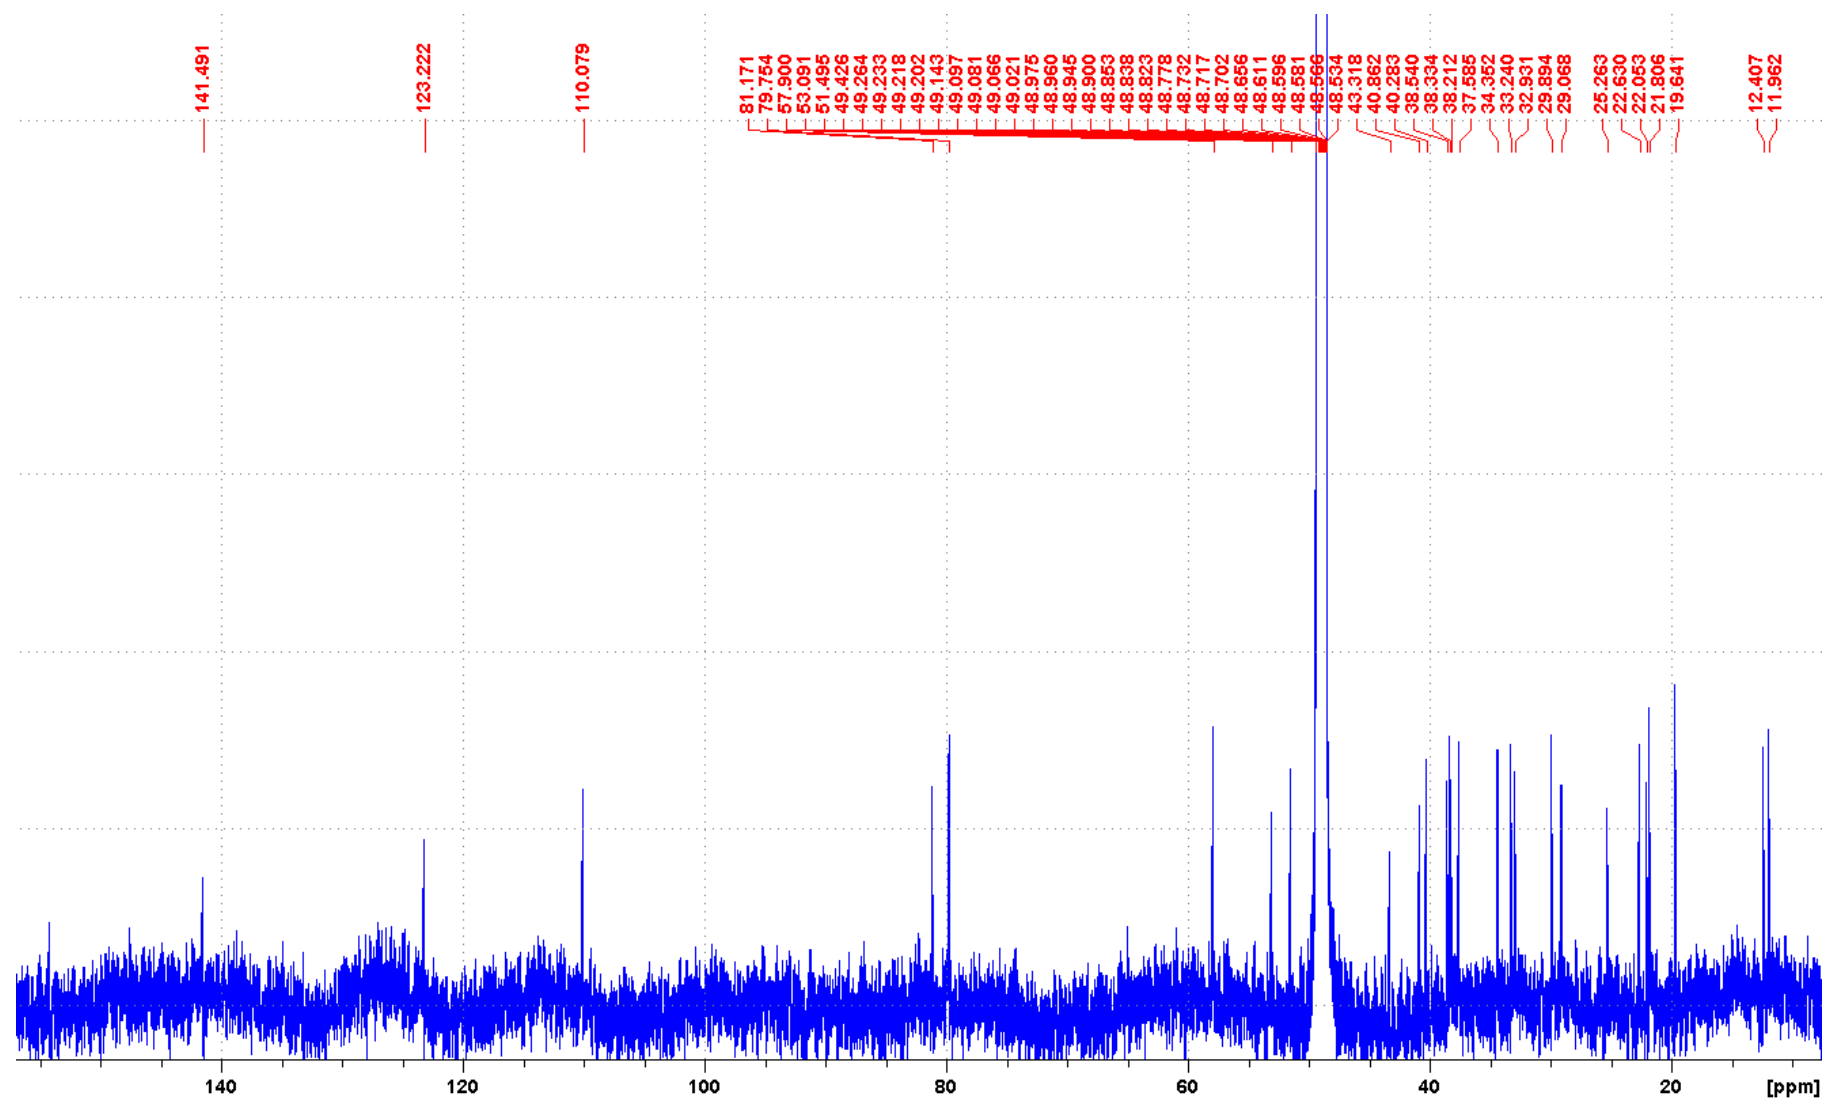

**Figure S18.**  $^1\text{H}$ - $^1\text{H}$  COSY (700.13 MHz,  $\text{CD}_3\text{OD}$ ) spectrum of compound **3**.

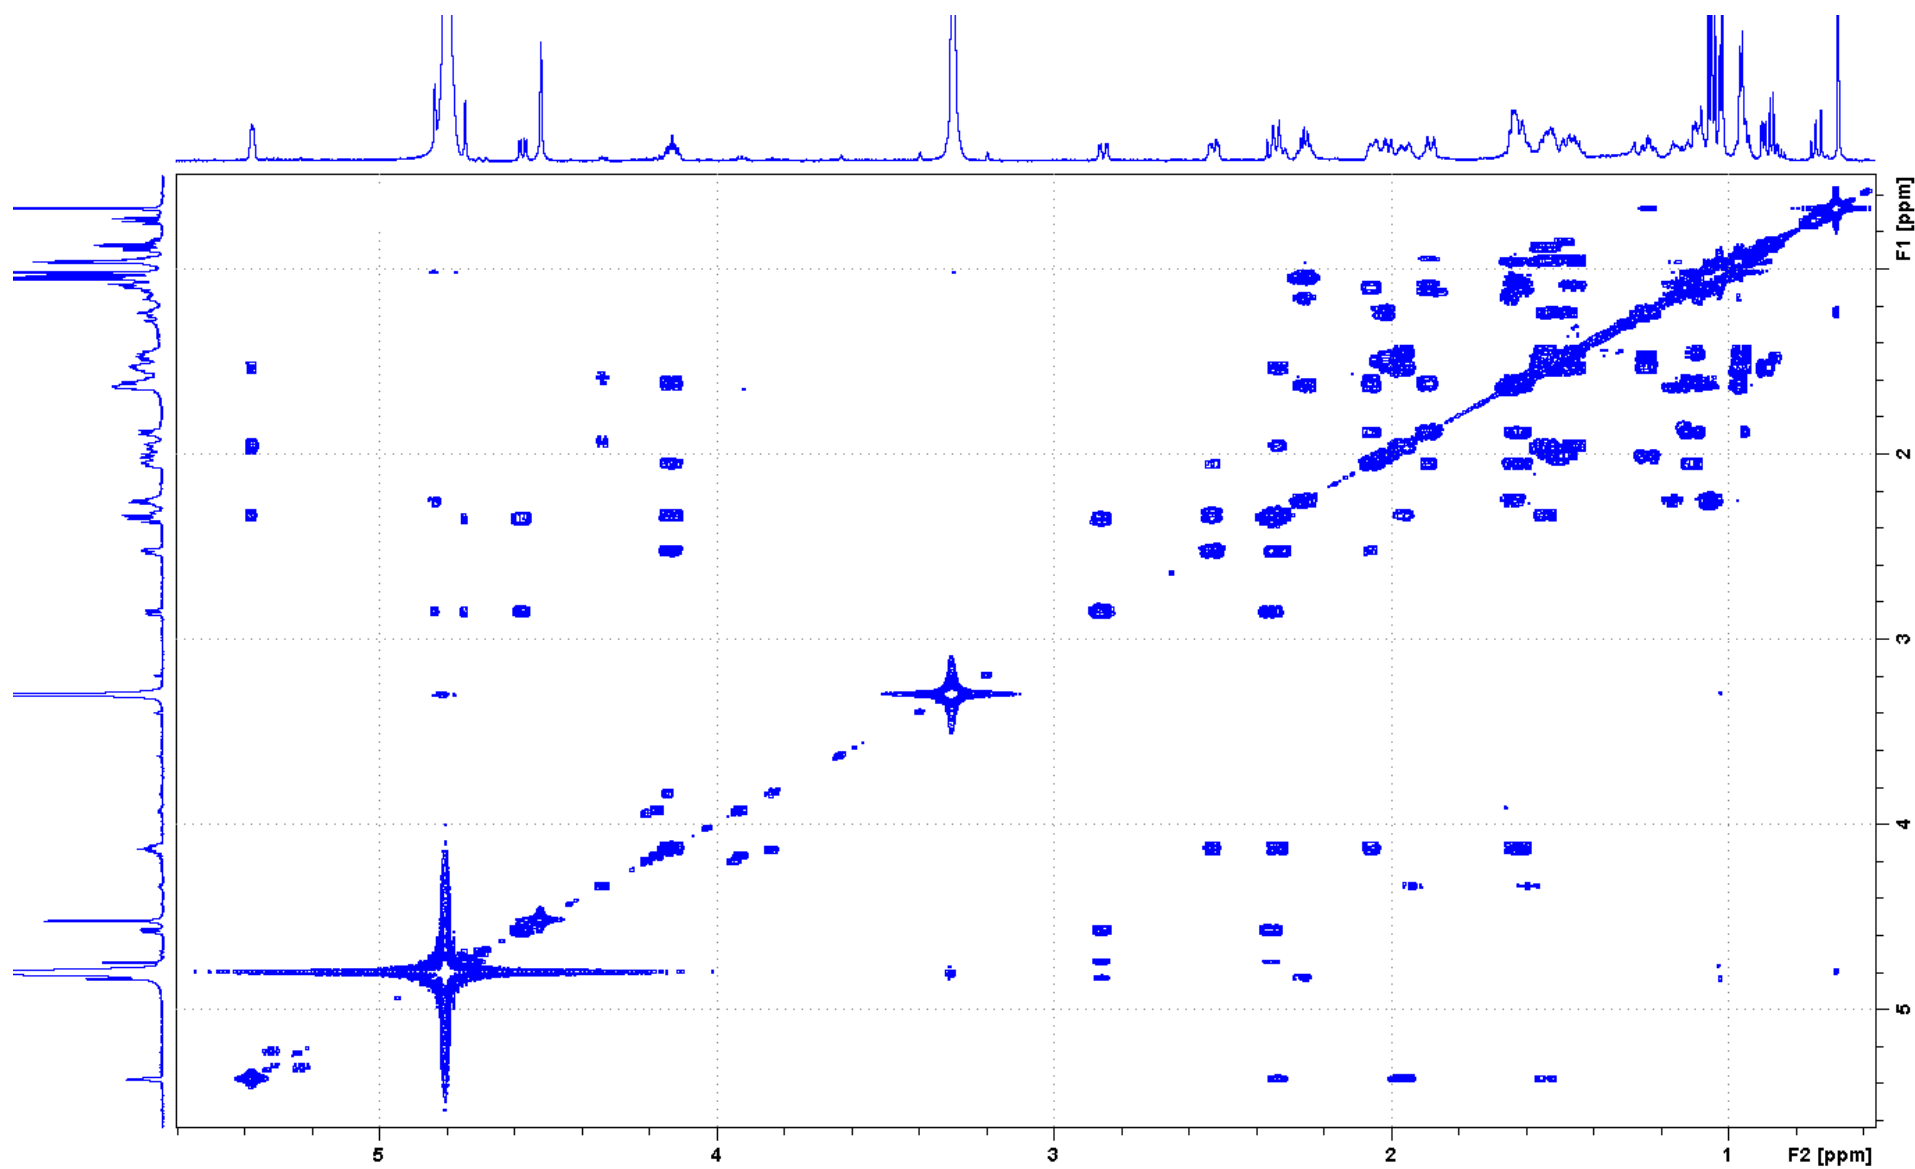

**Figure S19.** HSQC (700.13 MHz, CD<sub>3</sub>OD) spectrum of compound **3**.

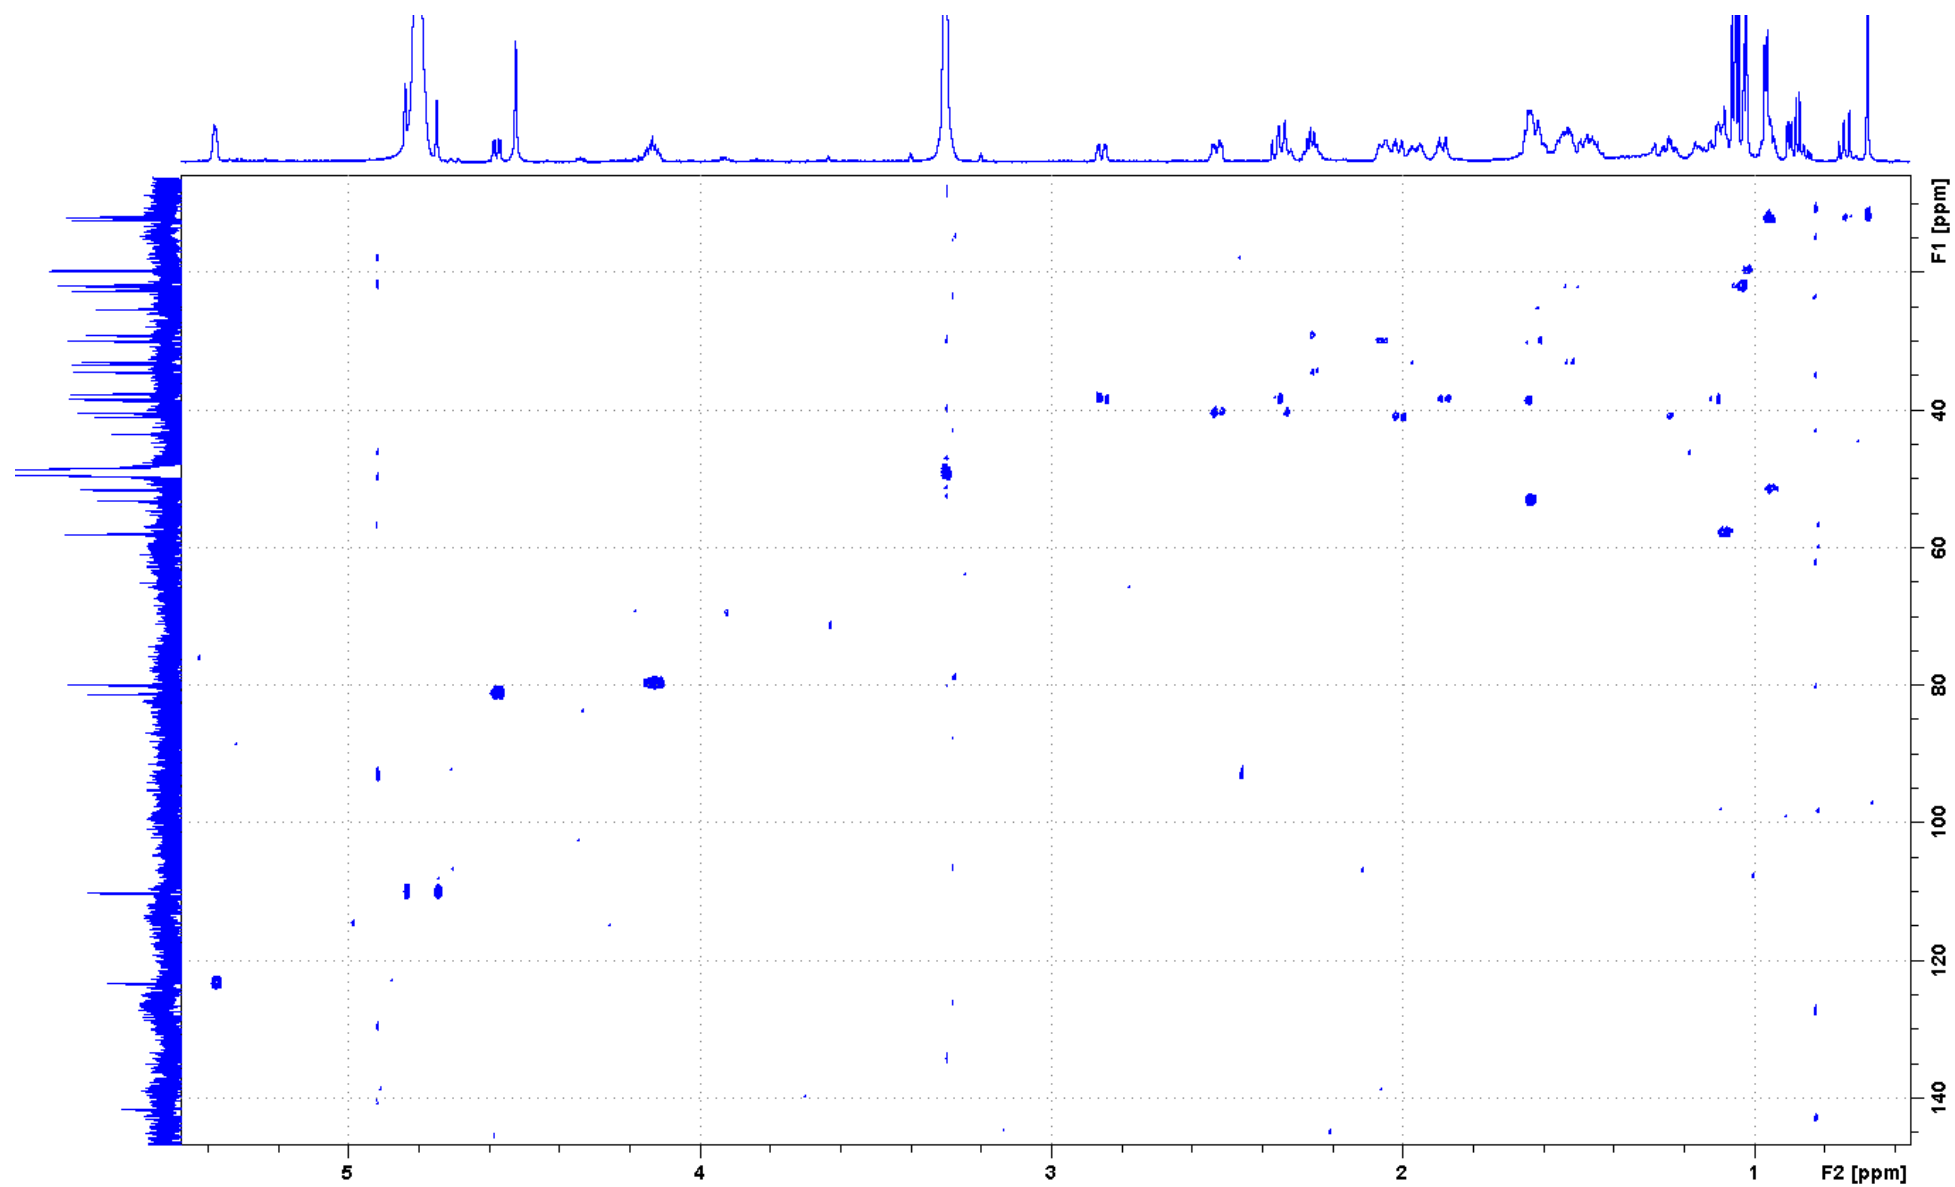

**Figure S20.** HMBC (700.13 MHz, CD<sub>3</sub>OD) spectrum of compound **3**.

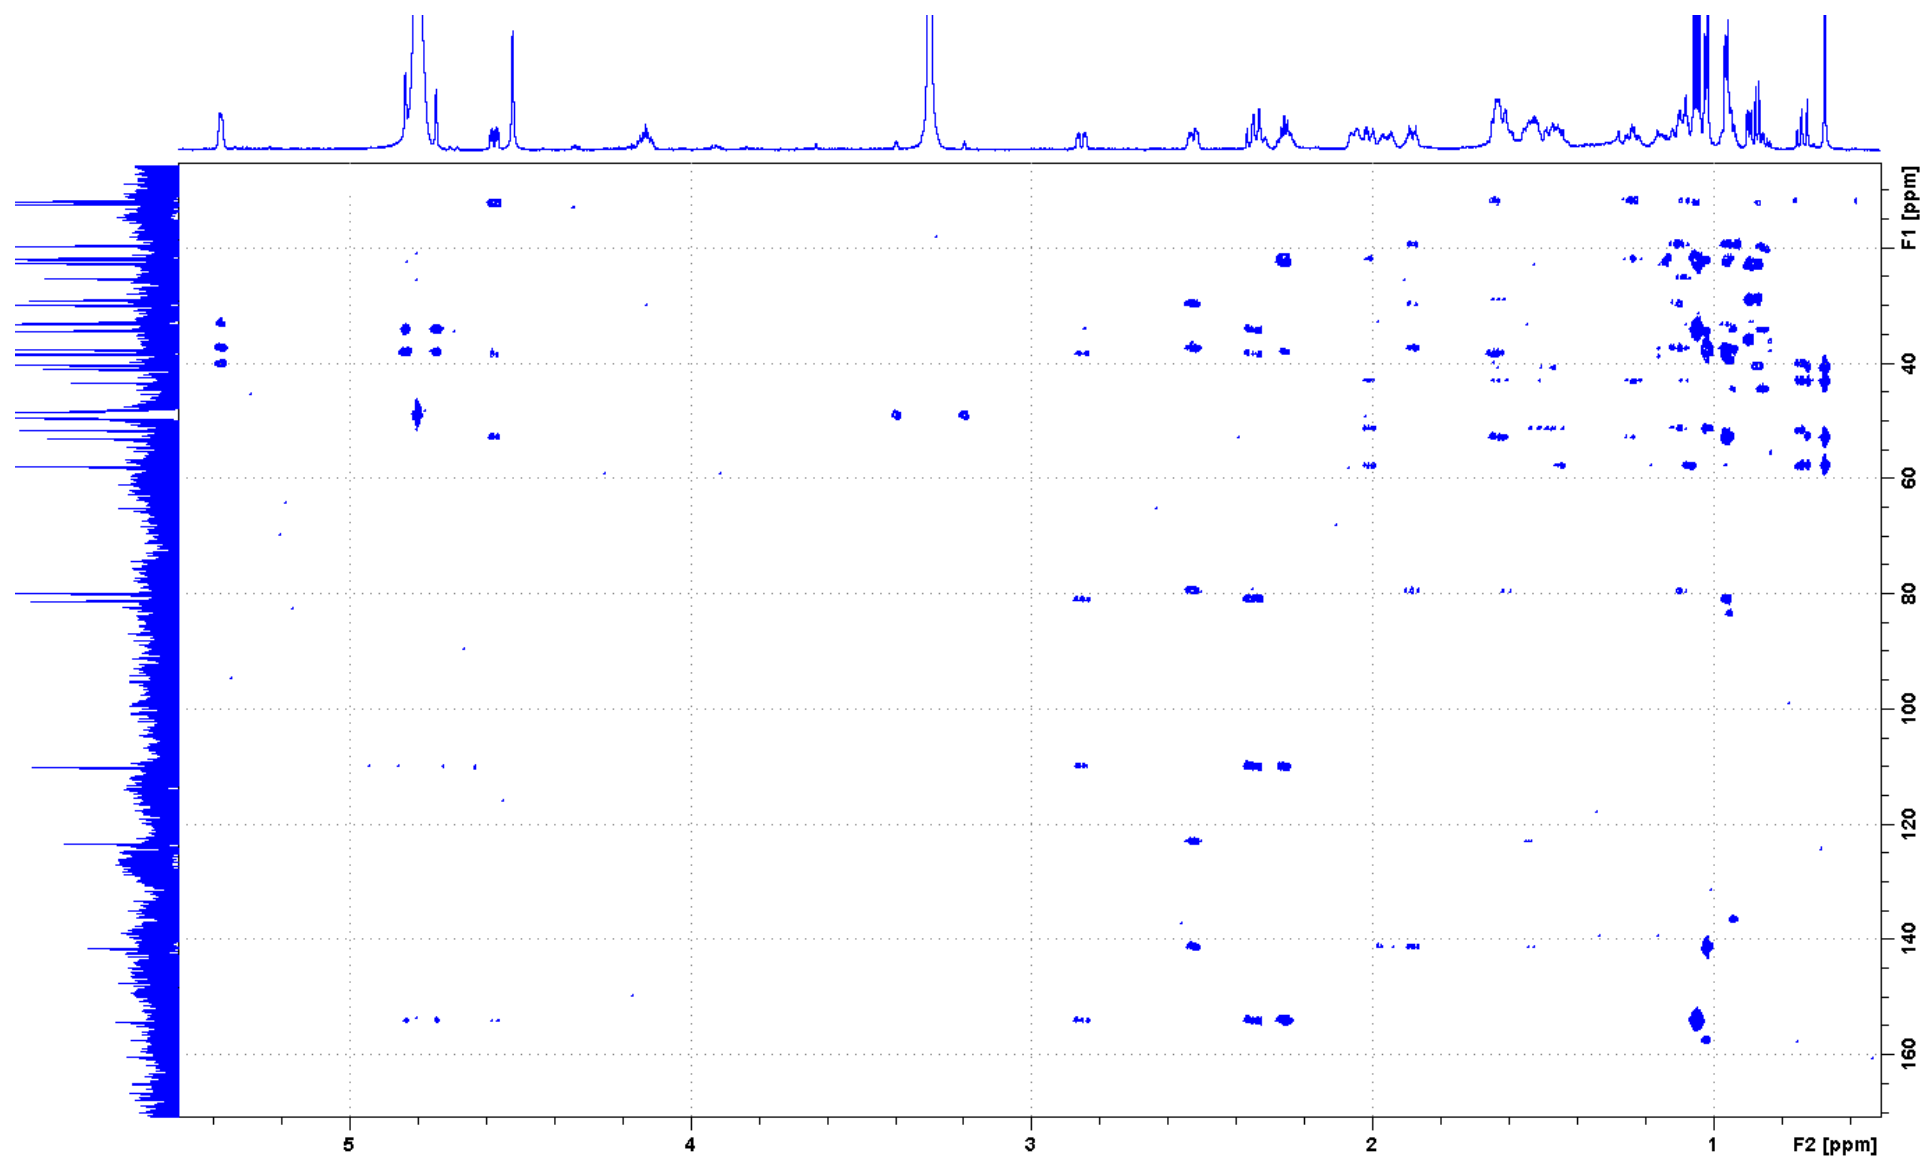

**Figure S21.** ROESY (700.13 MHz, CD<sub>3</sub>OD) spectrum of compound **3**.

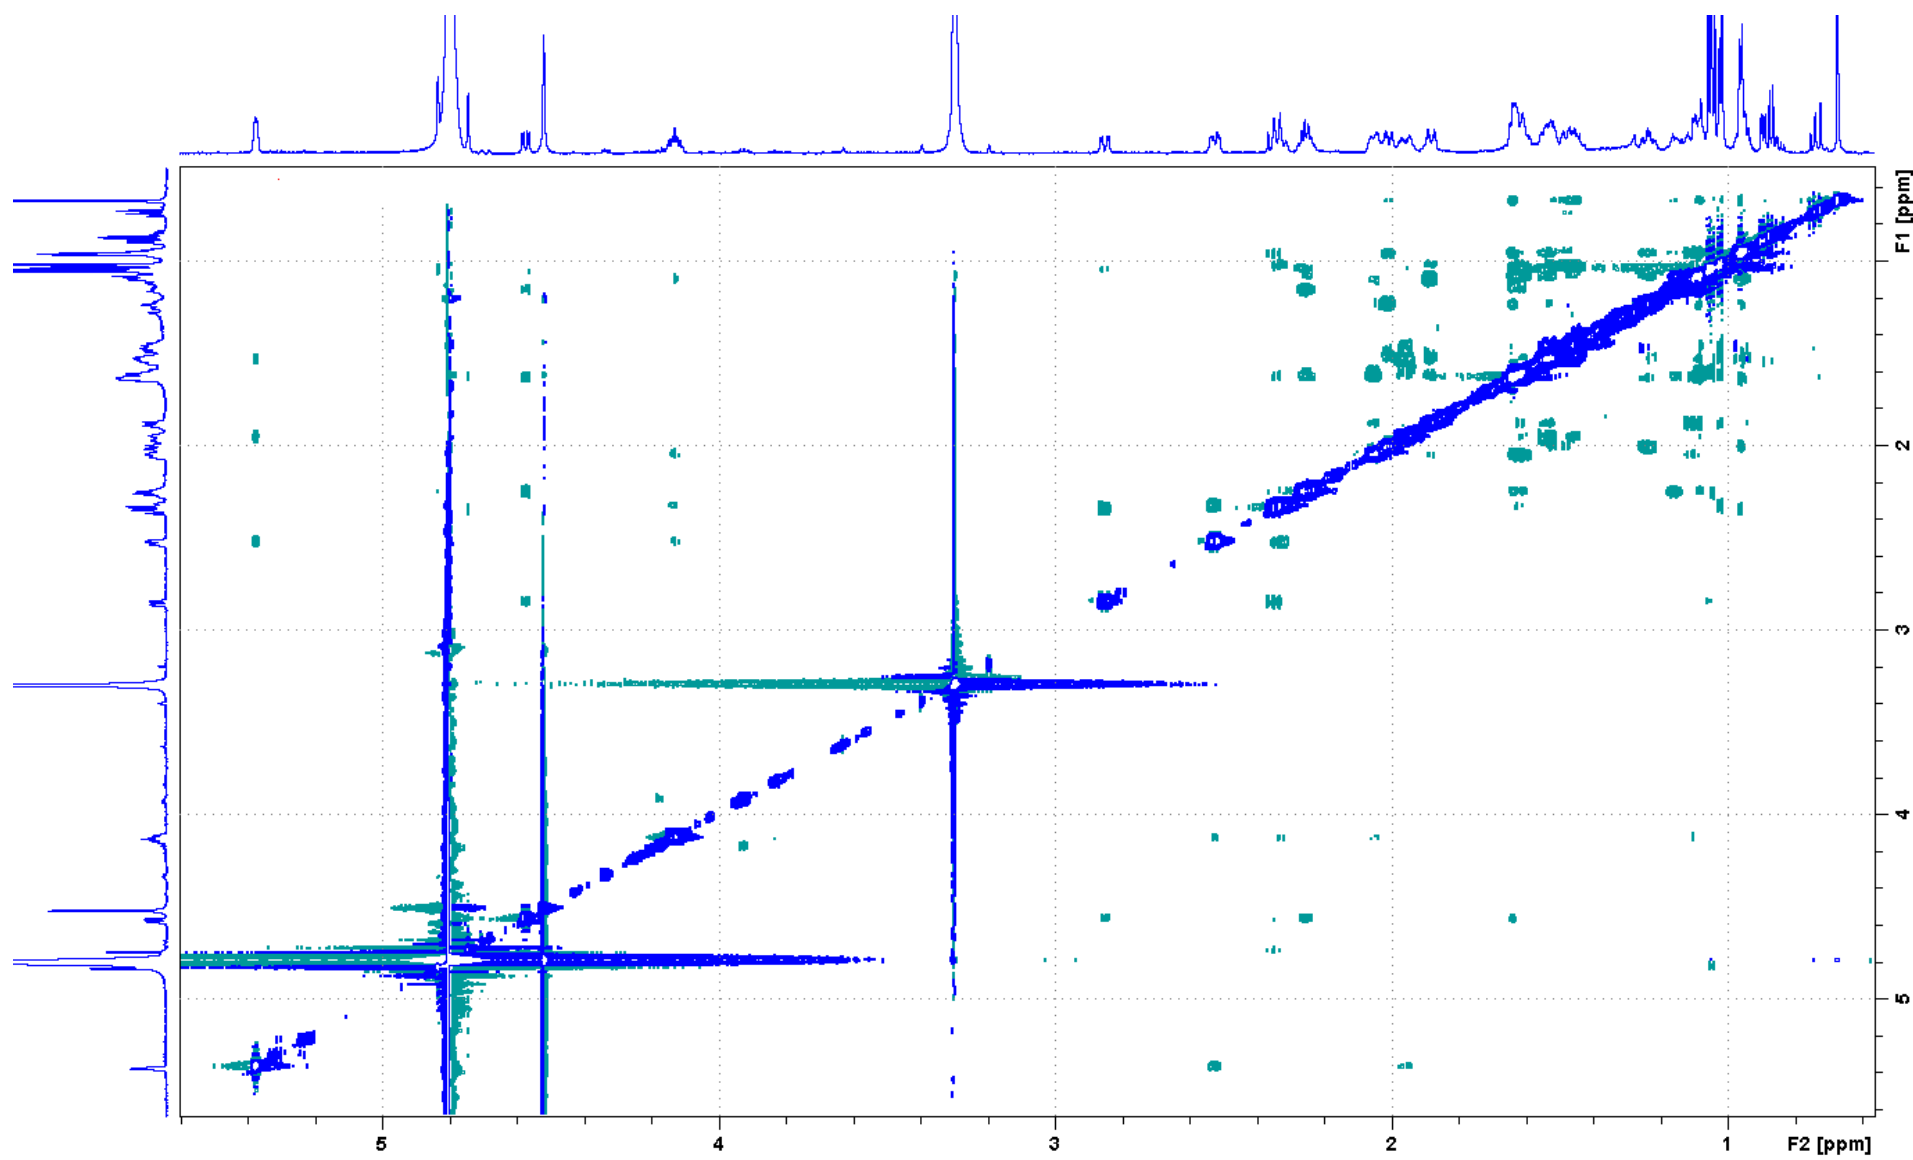



**Figure S22.** HRESIMS and HRESIMS/MS spectra of compound **4**

(-)HRESIMS:  $[M - Na]^-$  and  $[M - 2Na]^{2-}$  ions

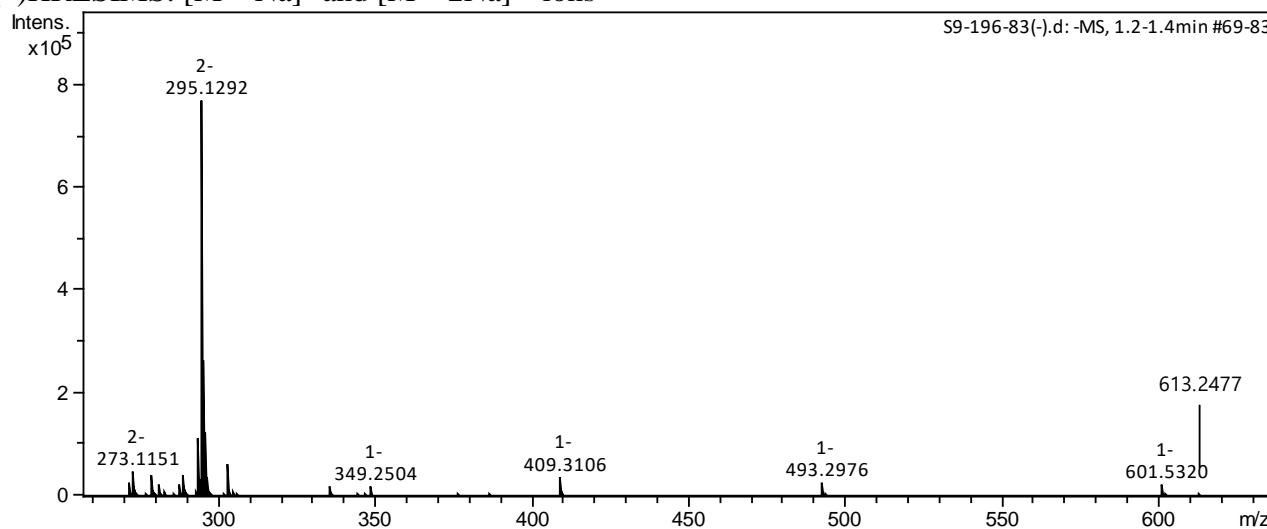

(+)HRESIMS:  $[M + Na]^+$  ion

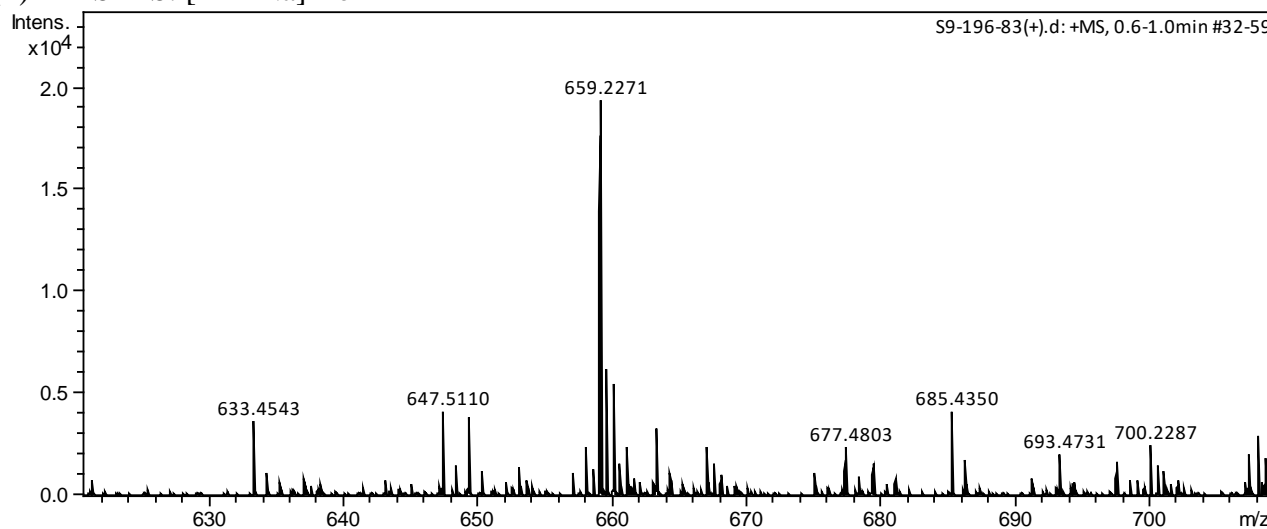

(-)HRESIMS/MS of the  $[M - 2Na]^{2-}$  ion at m/z 295.1280

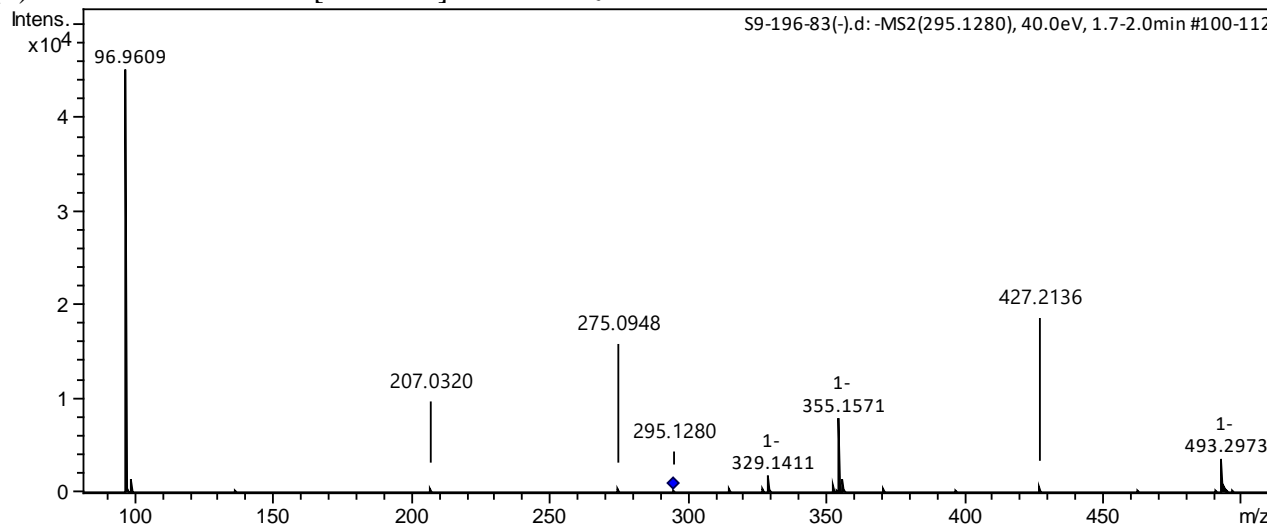

Figure S23.  $^1\text{H}$  NMR (700.13 MHz,  $\text{CD}_3\text{OD}$ ) spectrum of compound **4**.

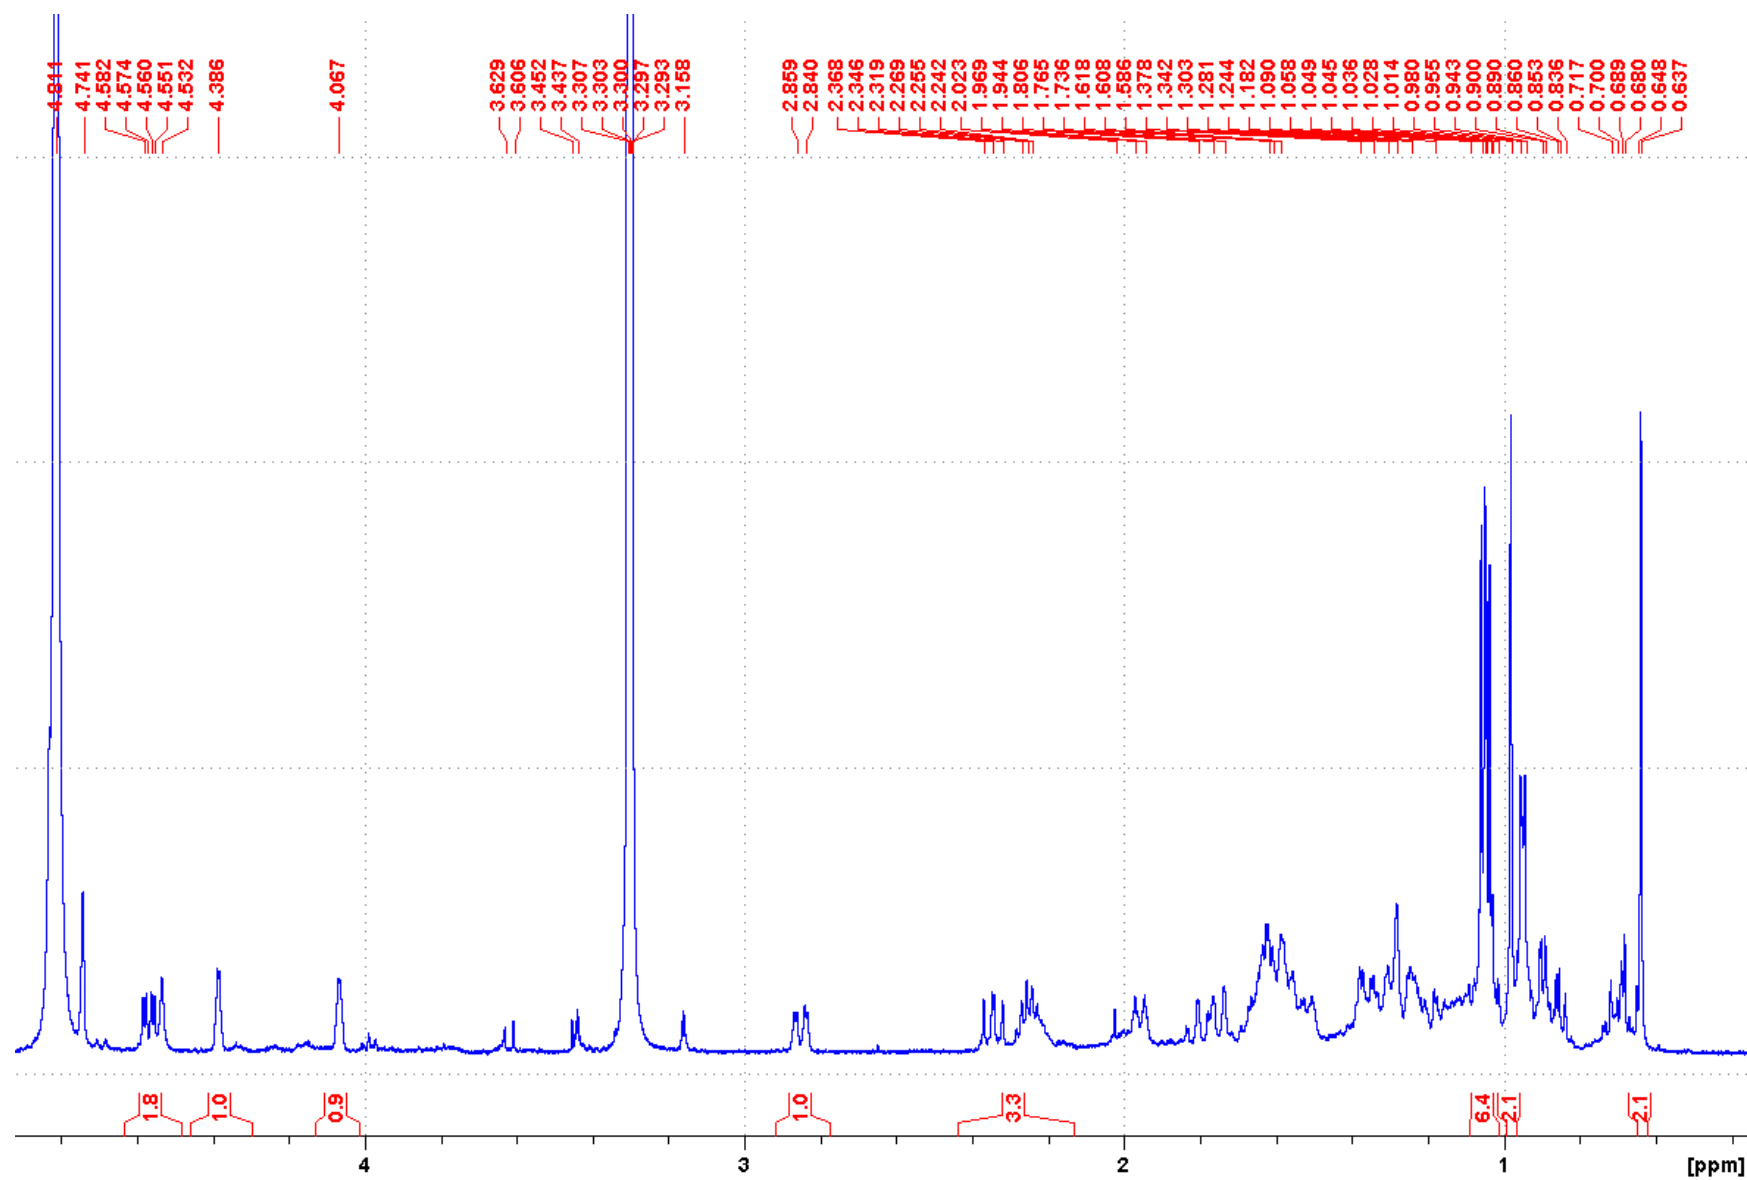

**Figure S24.**  $^{13}\text{C}$  NMR (176.04 MHz,  $\text{CD}_3\text{OD}$ ) spectrum of compound **4**.

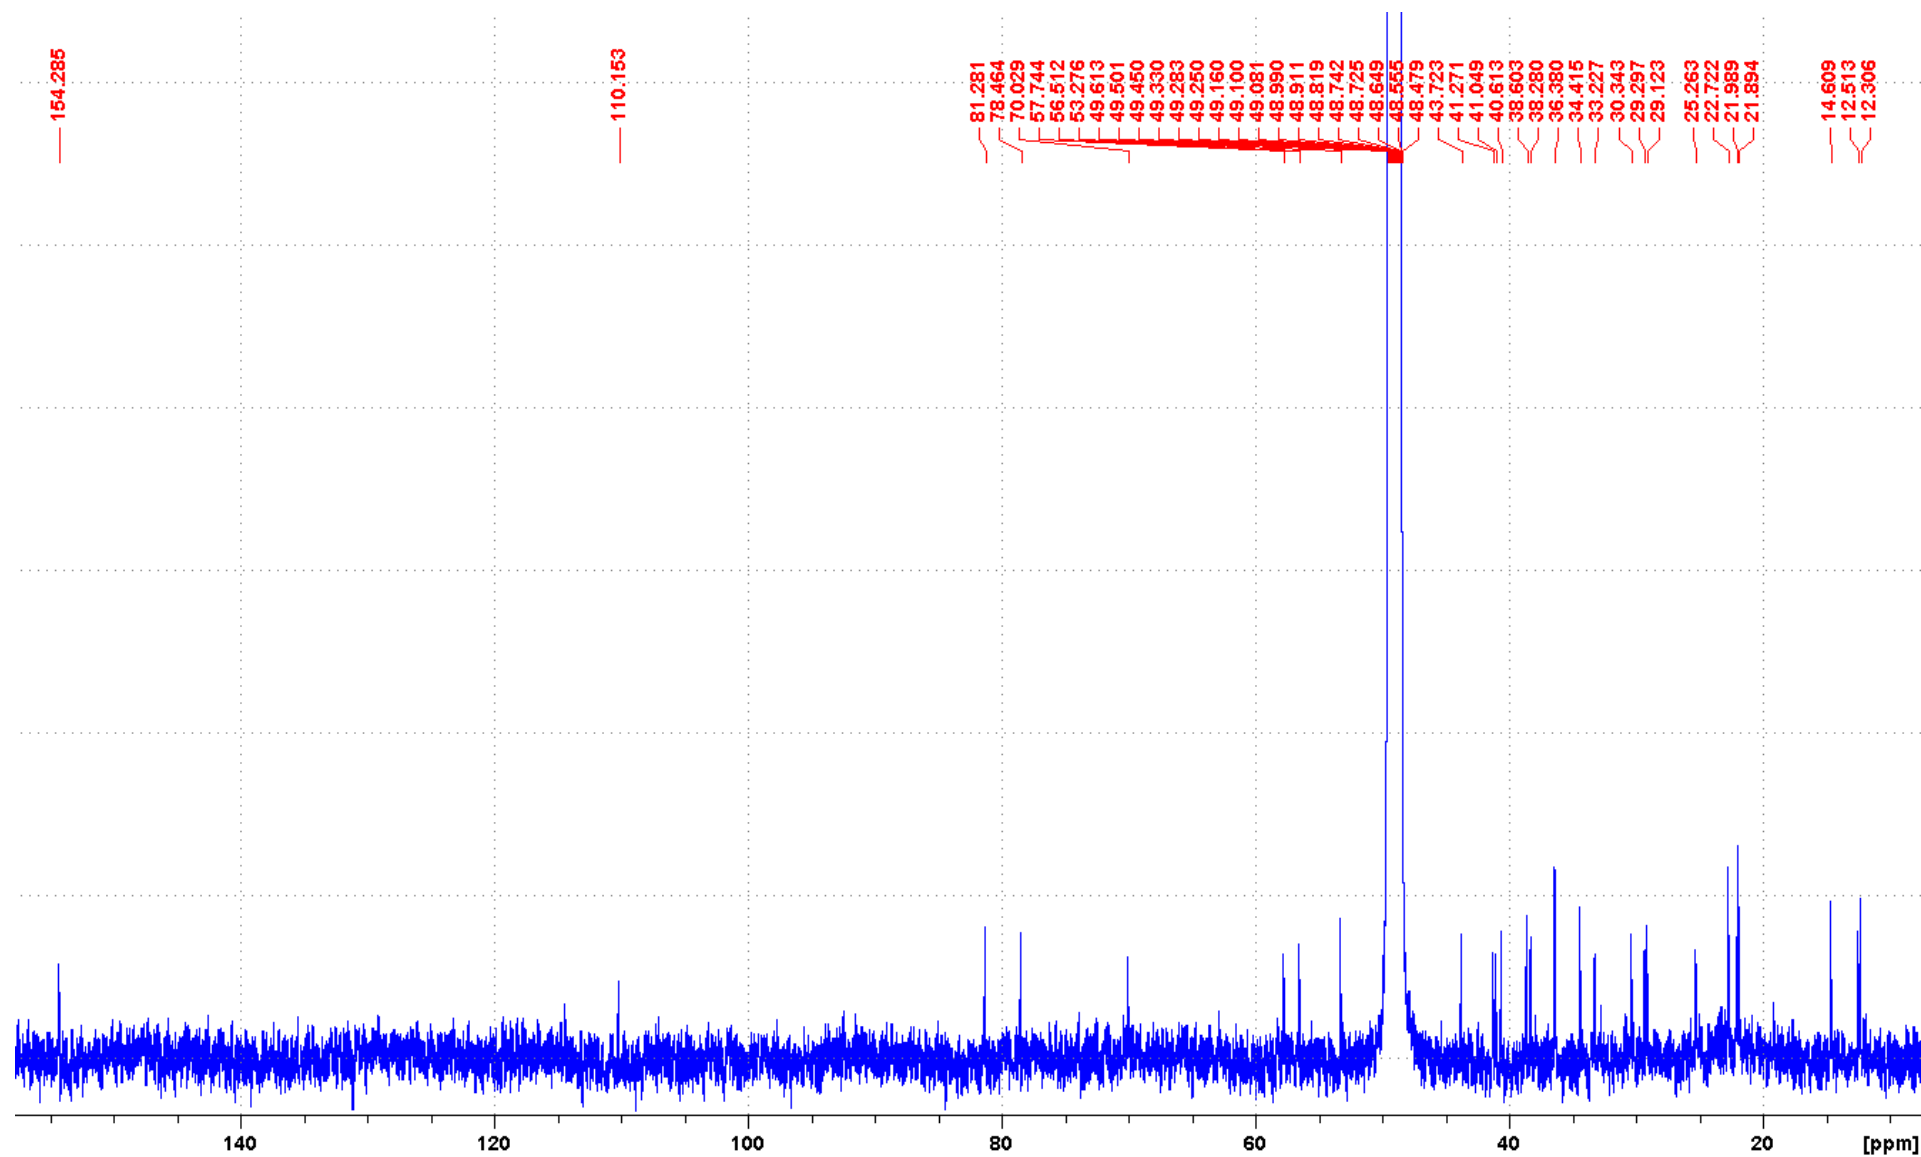

**Figure S25.**  $^1\text{H}$ - $^1\text{H}$  COSY (700.13 MHz,  $\text{CD}_3\text{OD}$ ) spectrum of compound **4**.

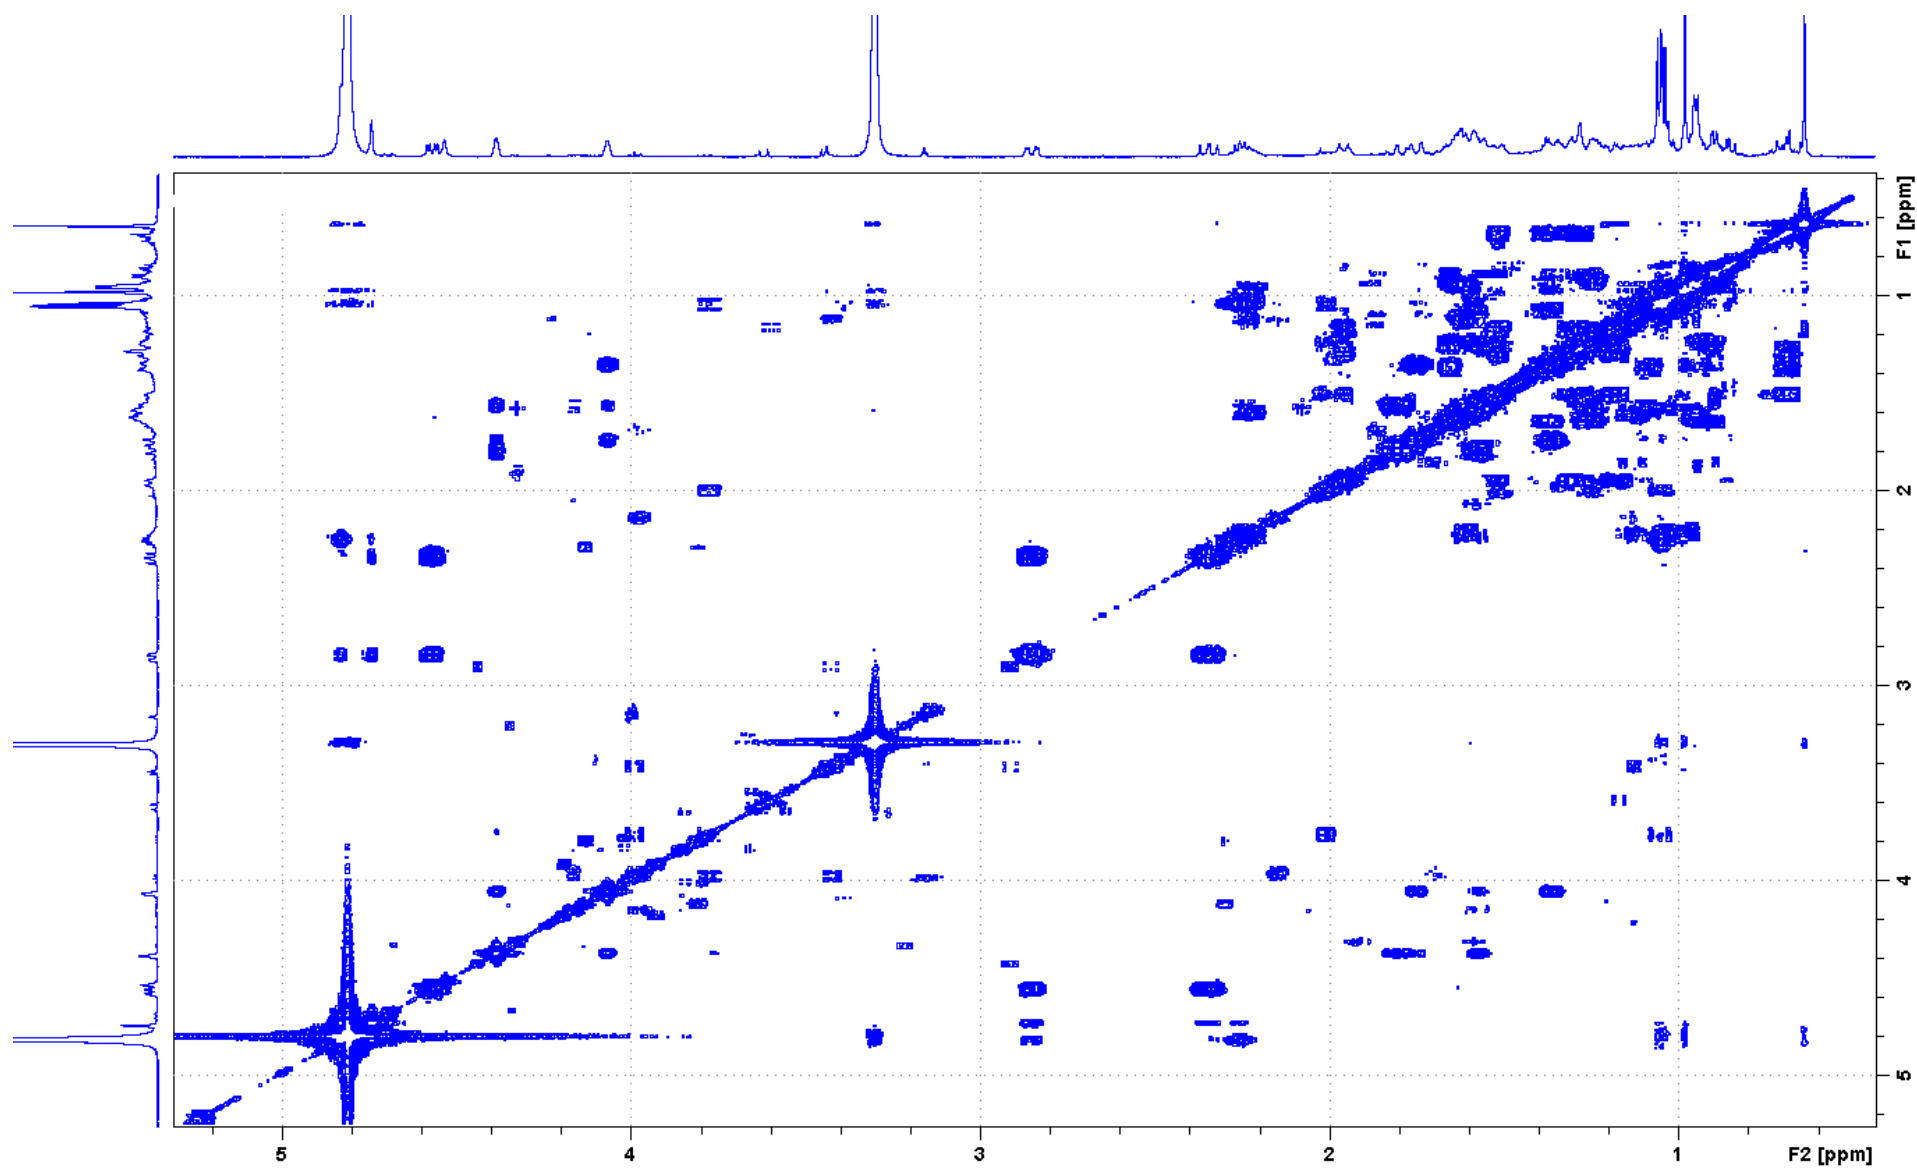

**Figure S26.** HSQC (700.13 MHz, CD<sub>3</sub>OD) spectrum of compound **4**.

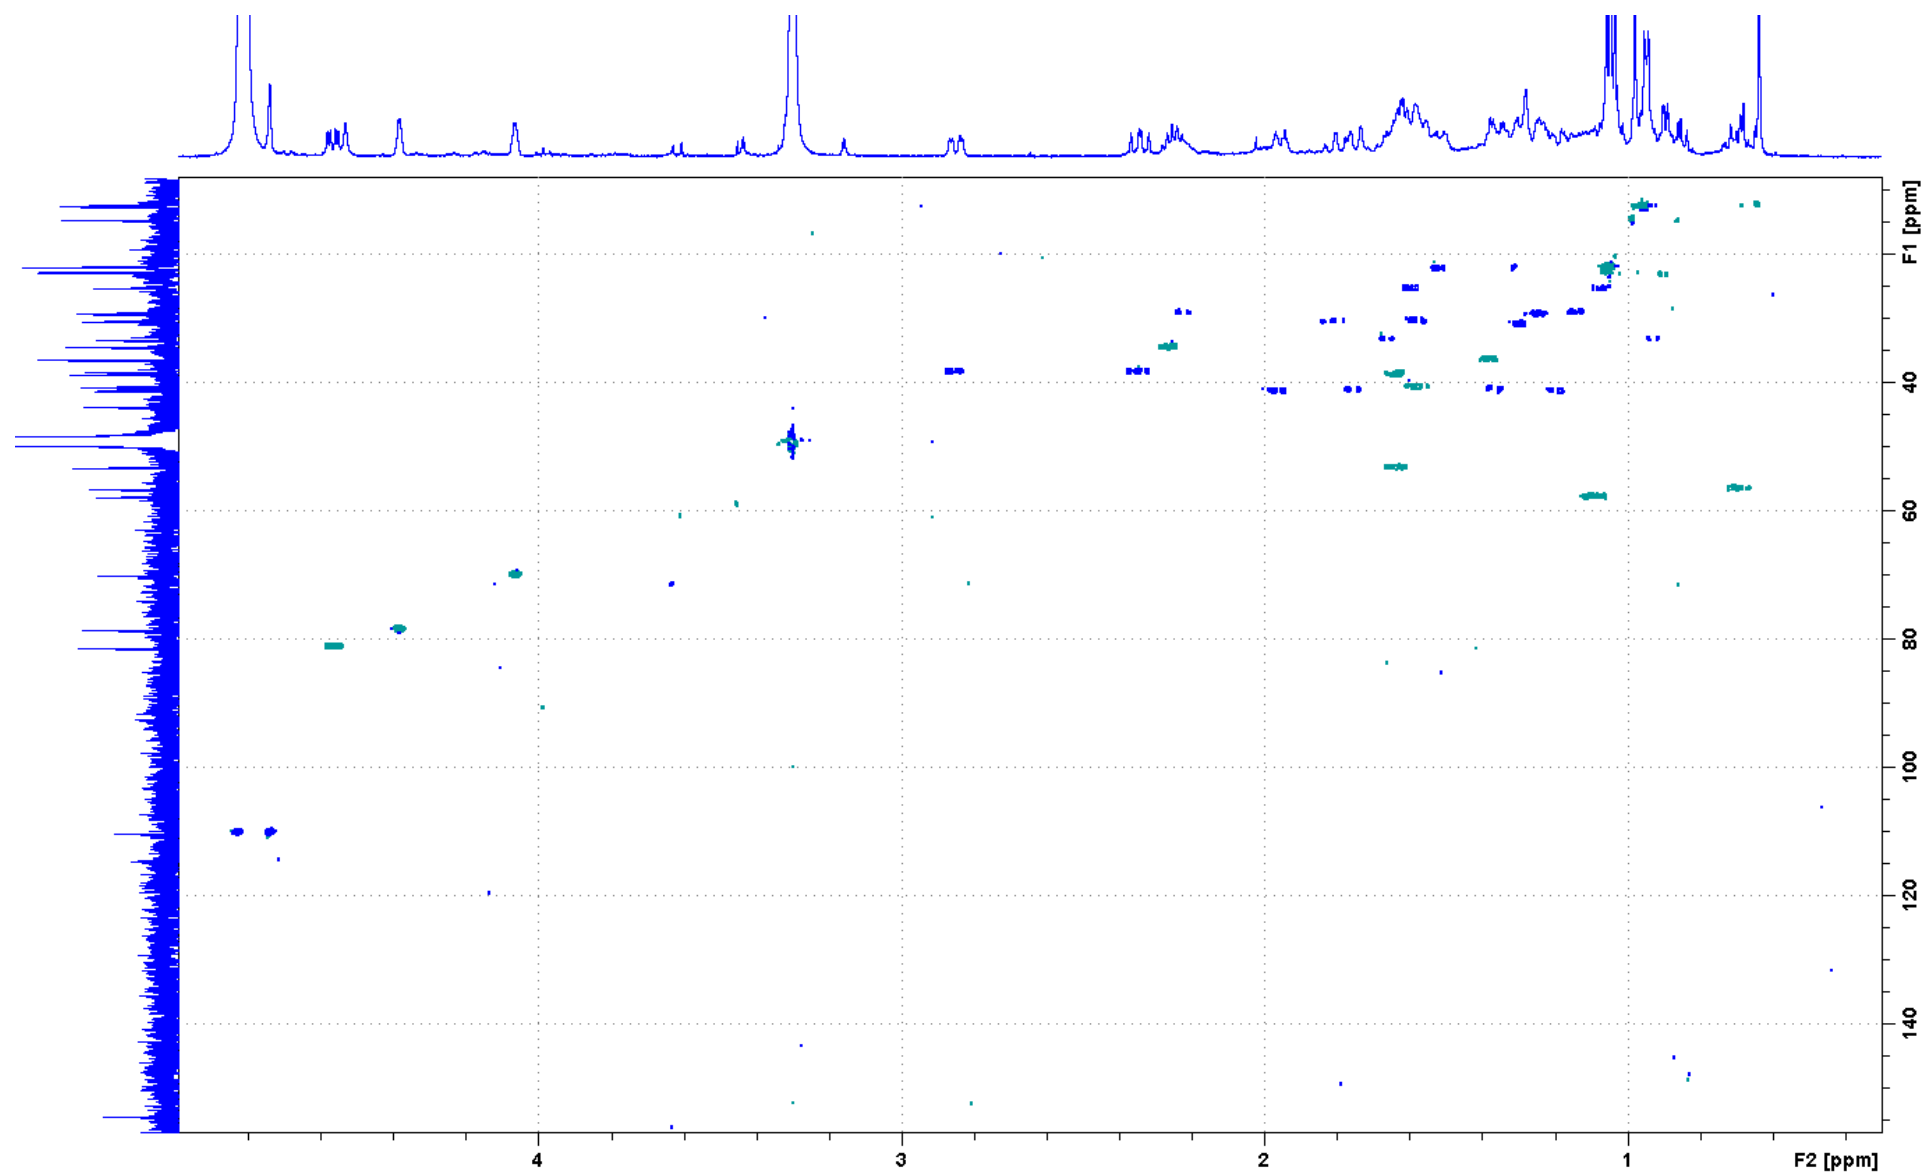

**Figure S27.** HMBC (700.13 MHz, CD<sub>3</sub>OD) spectrum of compound **4**.

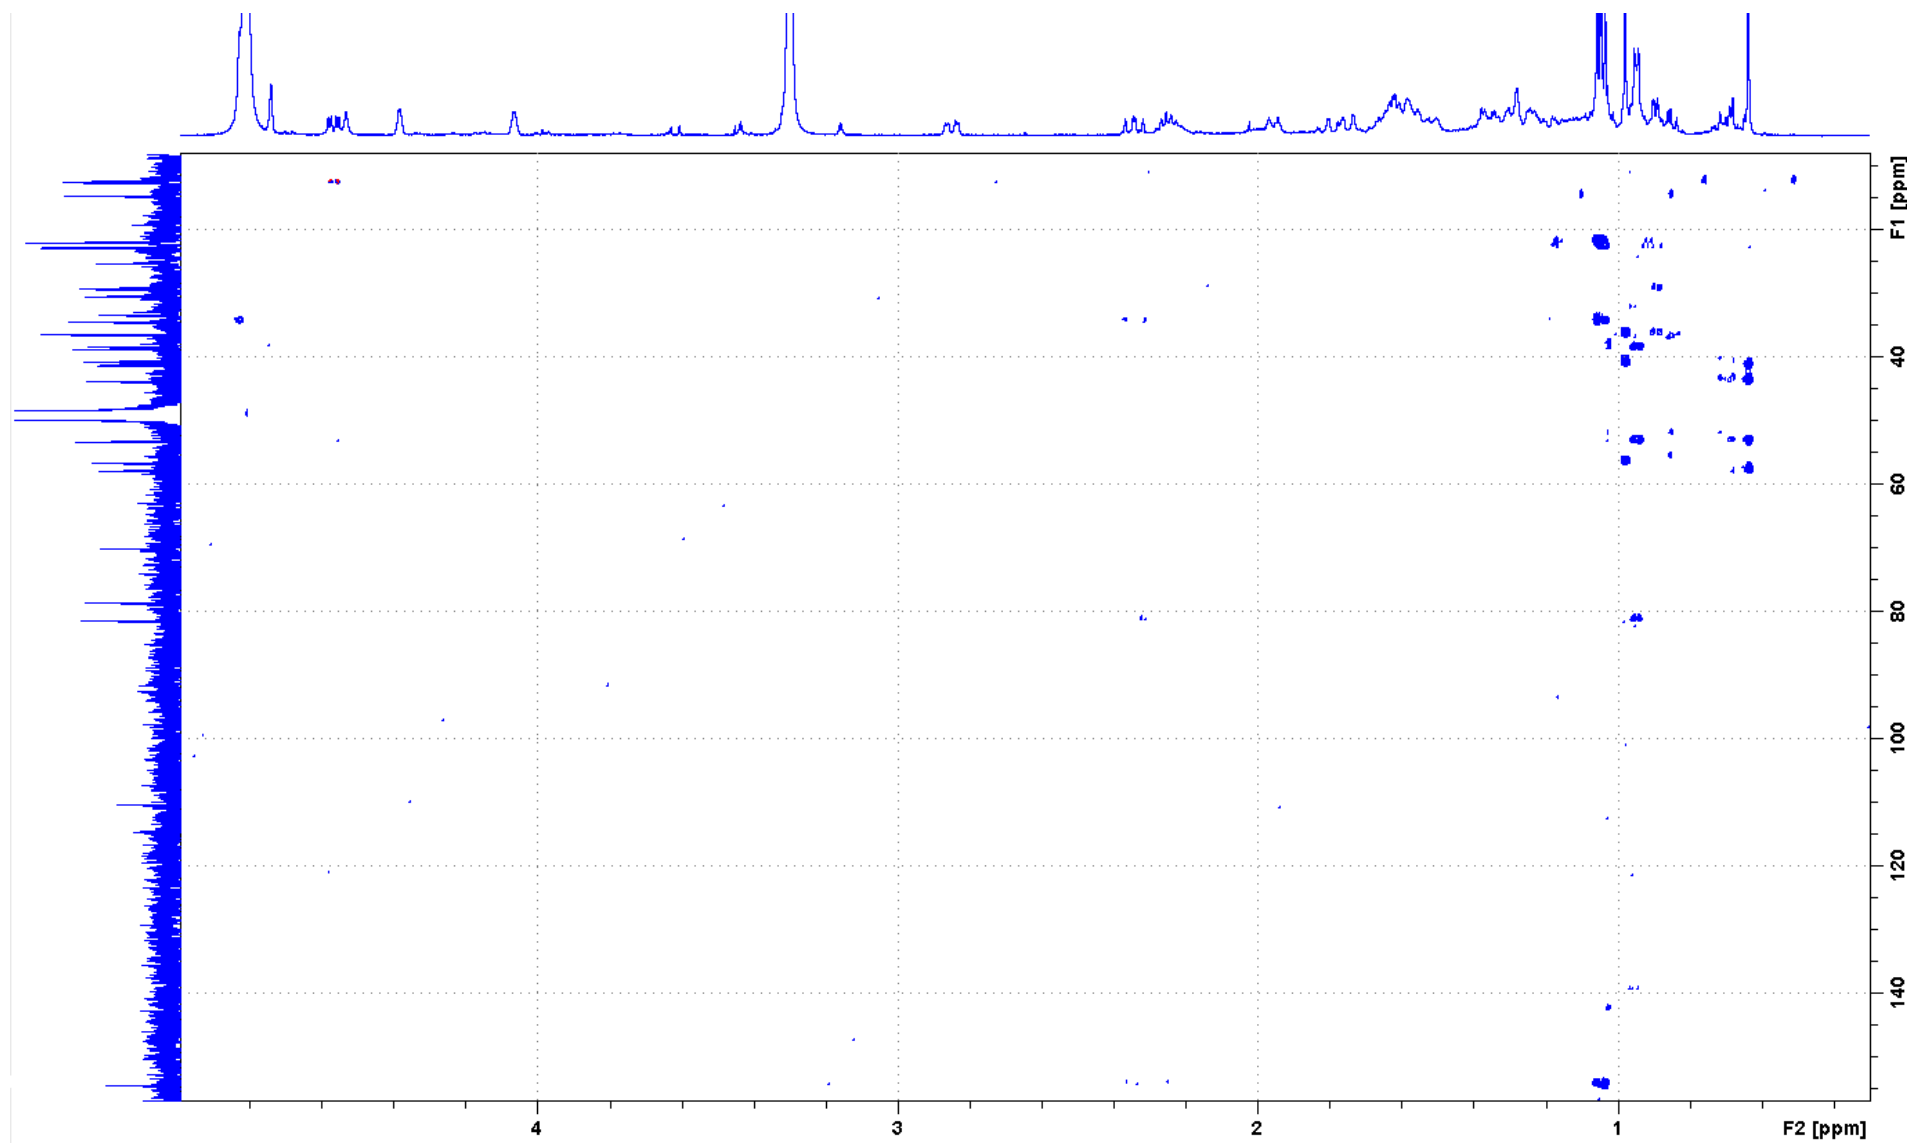

**Figure S28.** ROESY (700.13 MHz, CD<sub>3</sub>OD) spectrum of compound **4**.

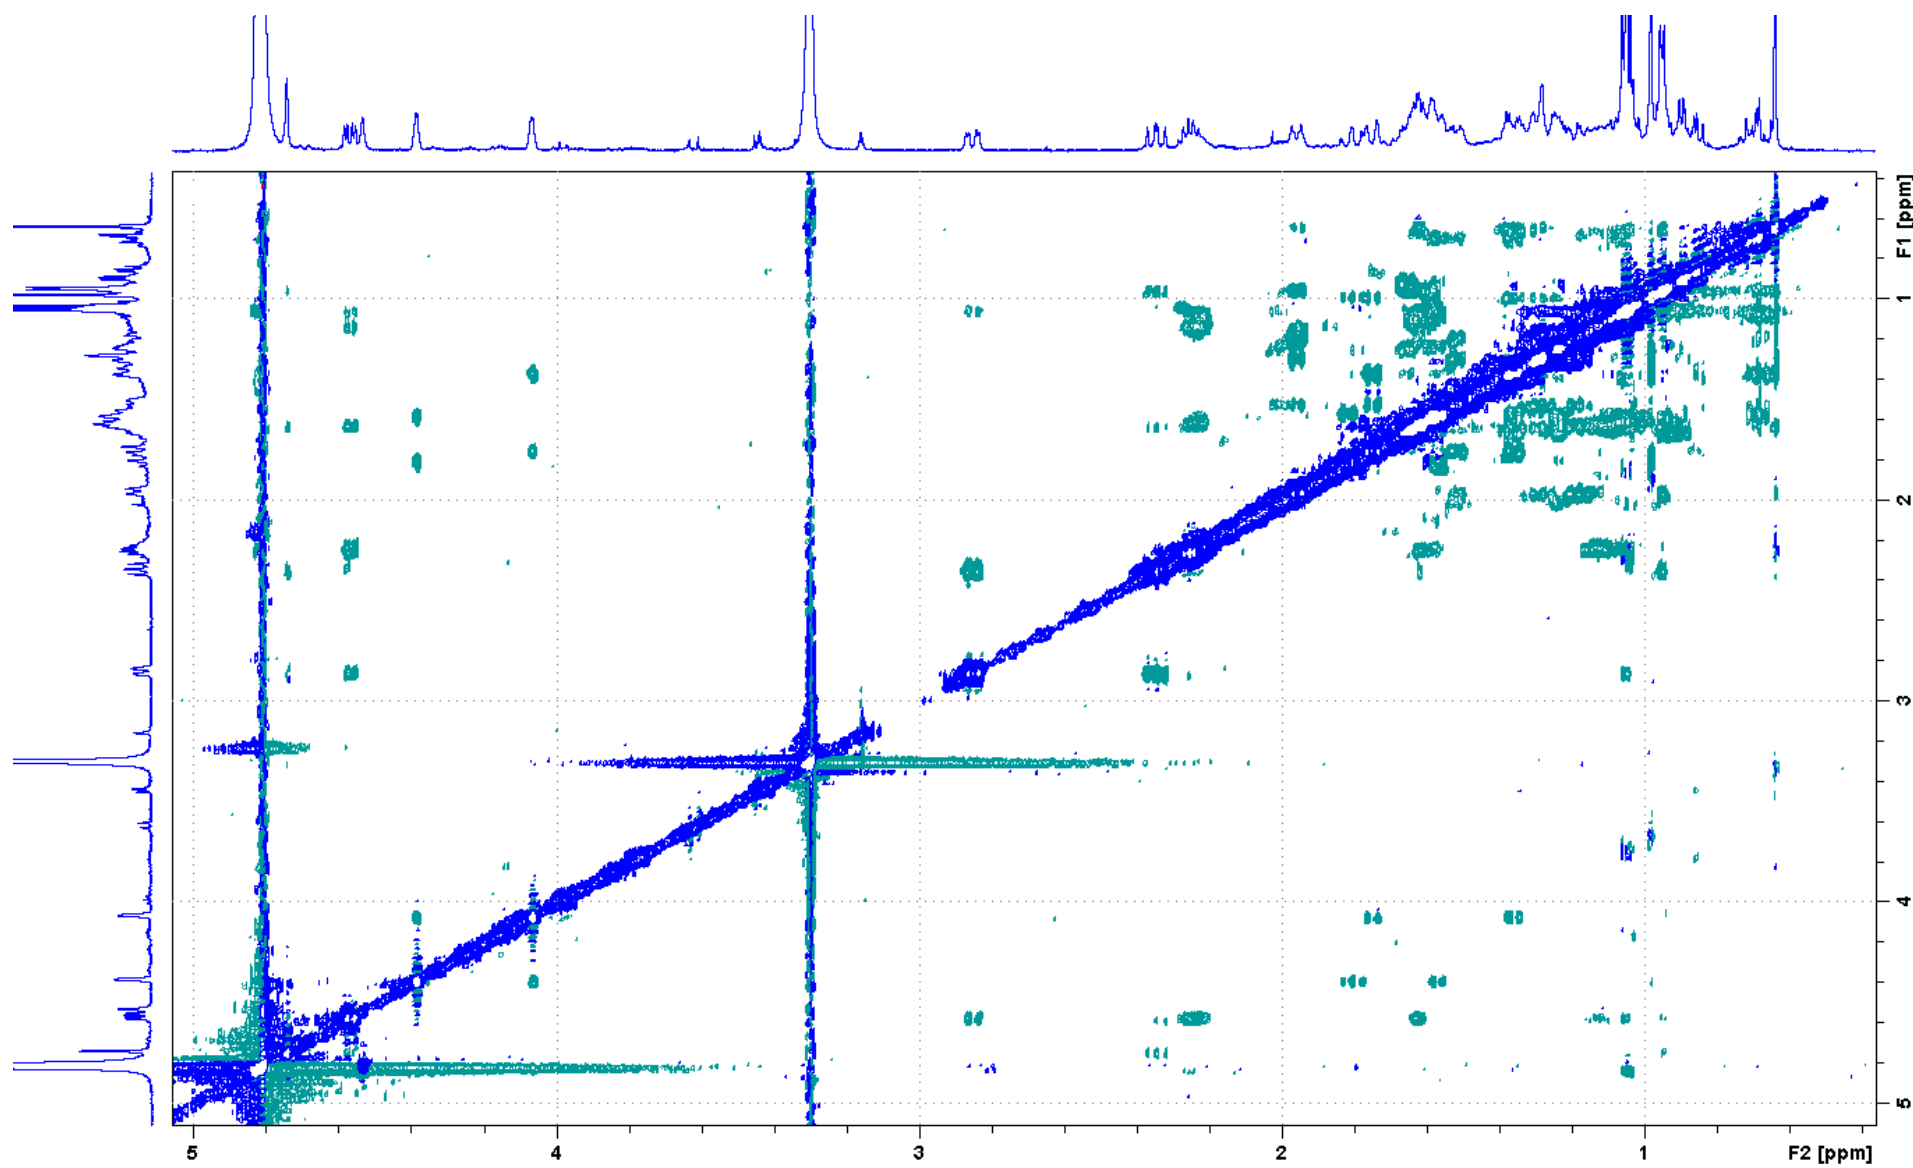

**Figure S29.** HRESIMS spectrum of compound **5**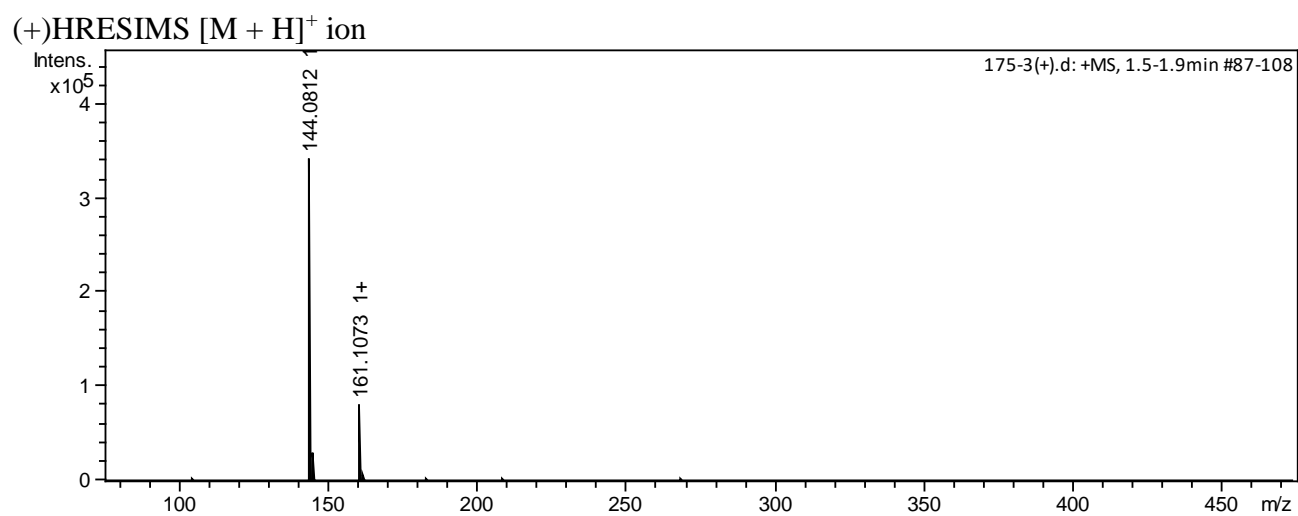



**Figure S30.**  $^1\text{H}$  NMR (700.13 MHz,  $\text{CD}_3\text{OD}$ ) spectrum of compound **5**

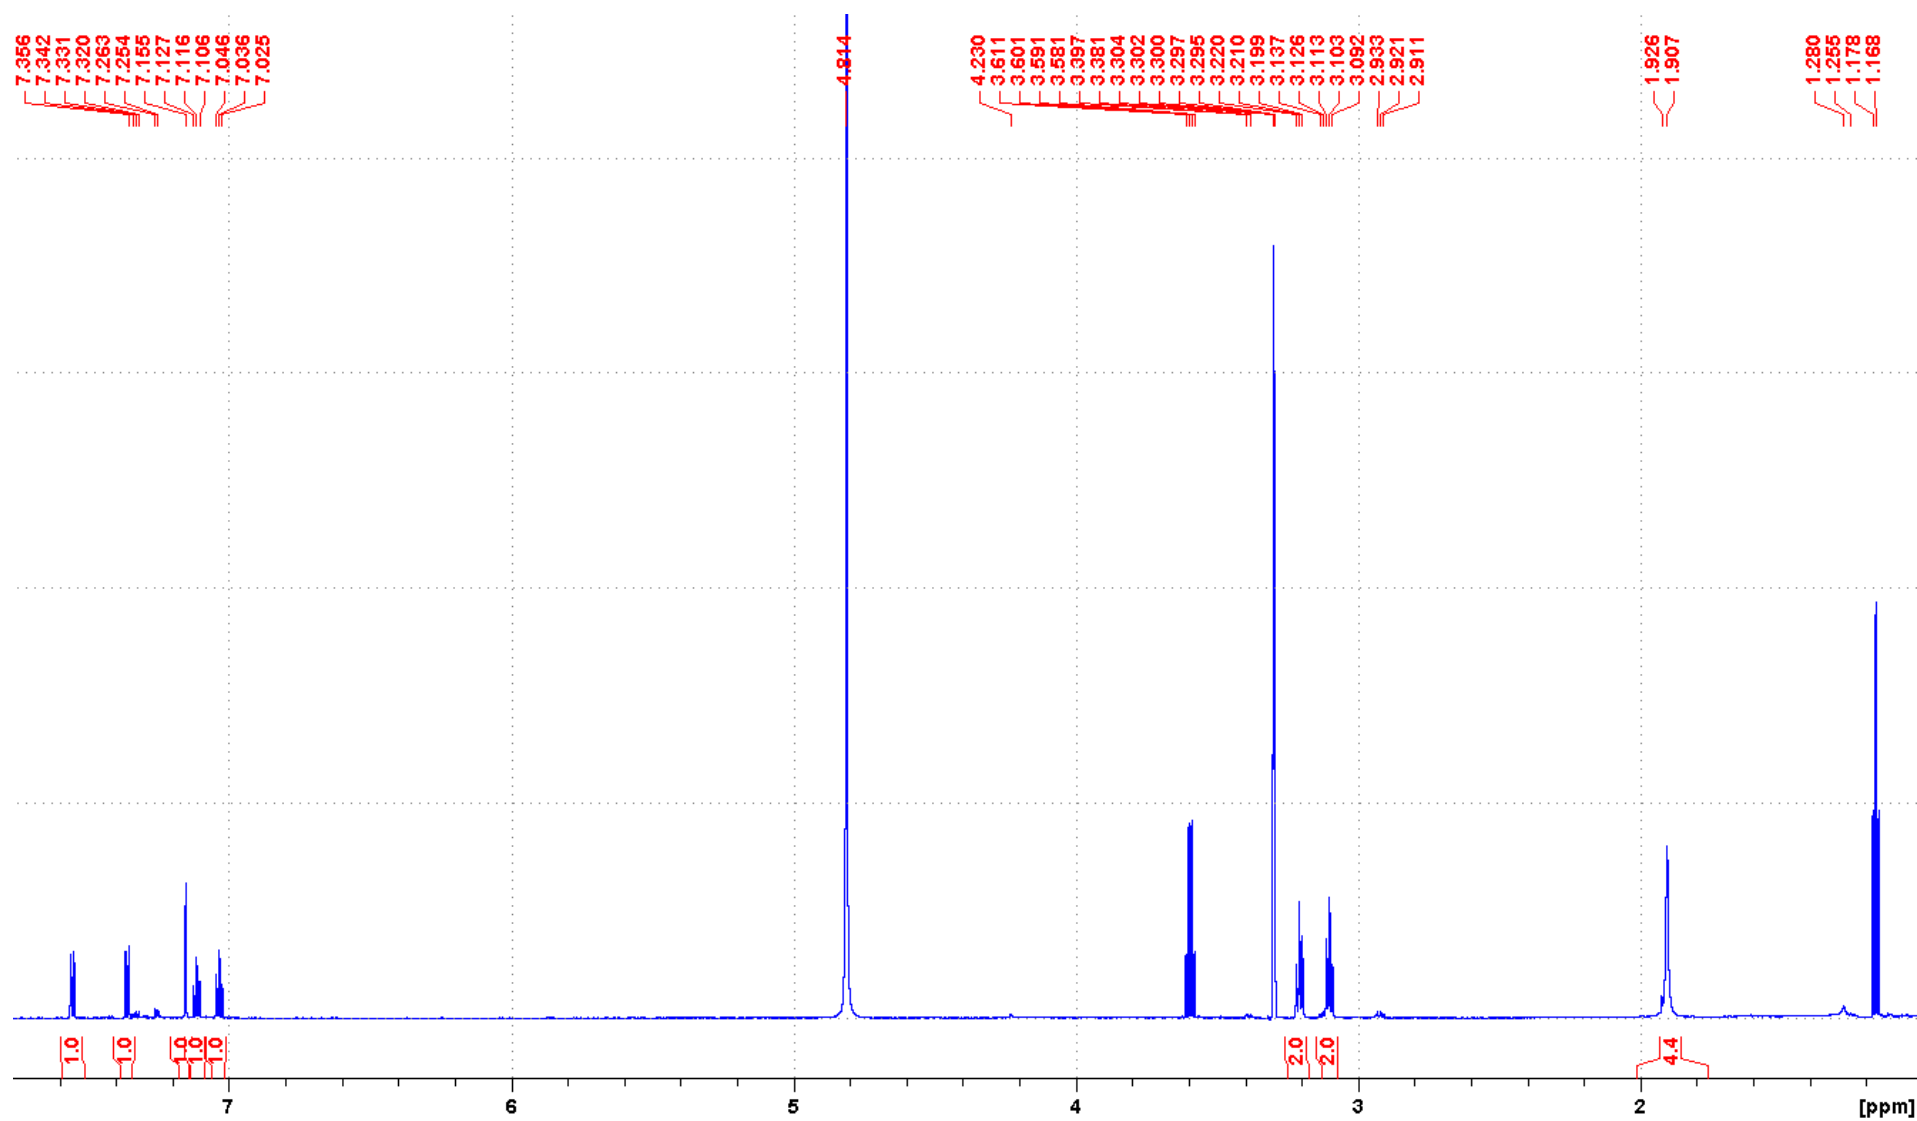

**Figure S31.**  $^{13}\text{C}$  NMR (176.04 MHz,  $\text{CD}_3\text{OD}$ ) spectrum of compound **5**

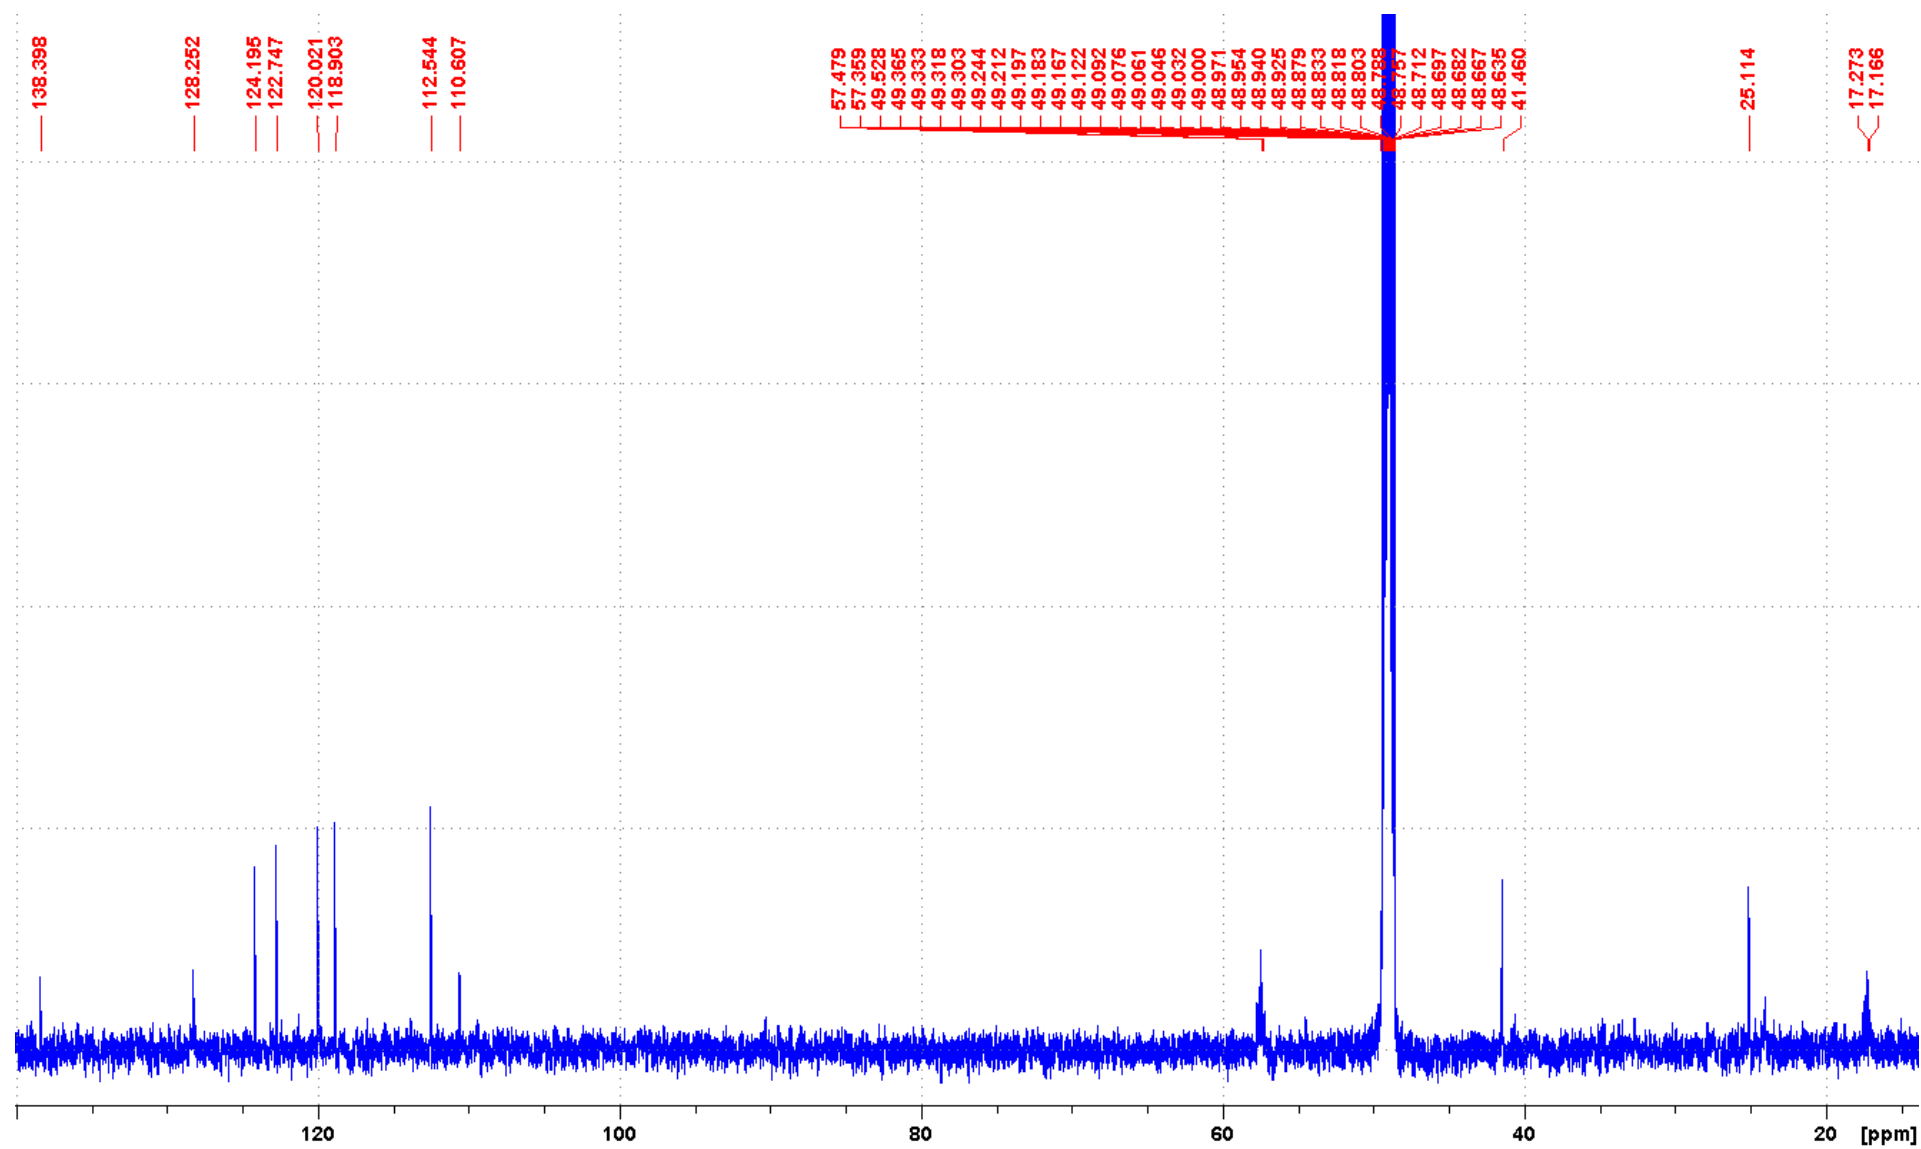

**Figure S32.** DEPT (176.04 MHz, CD<sub>3</sub>OD) spectrum of compound **5**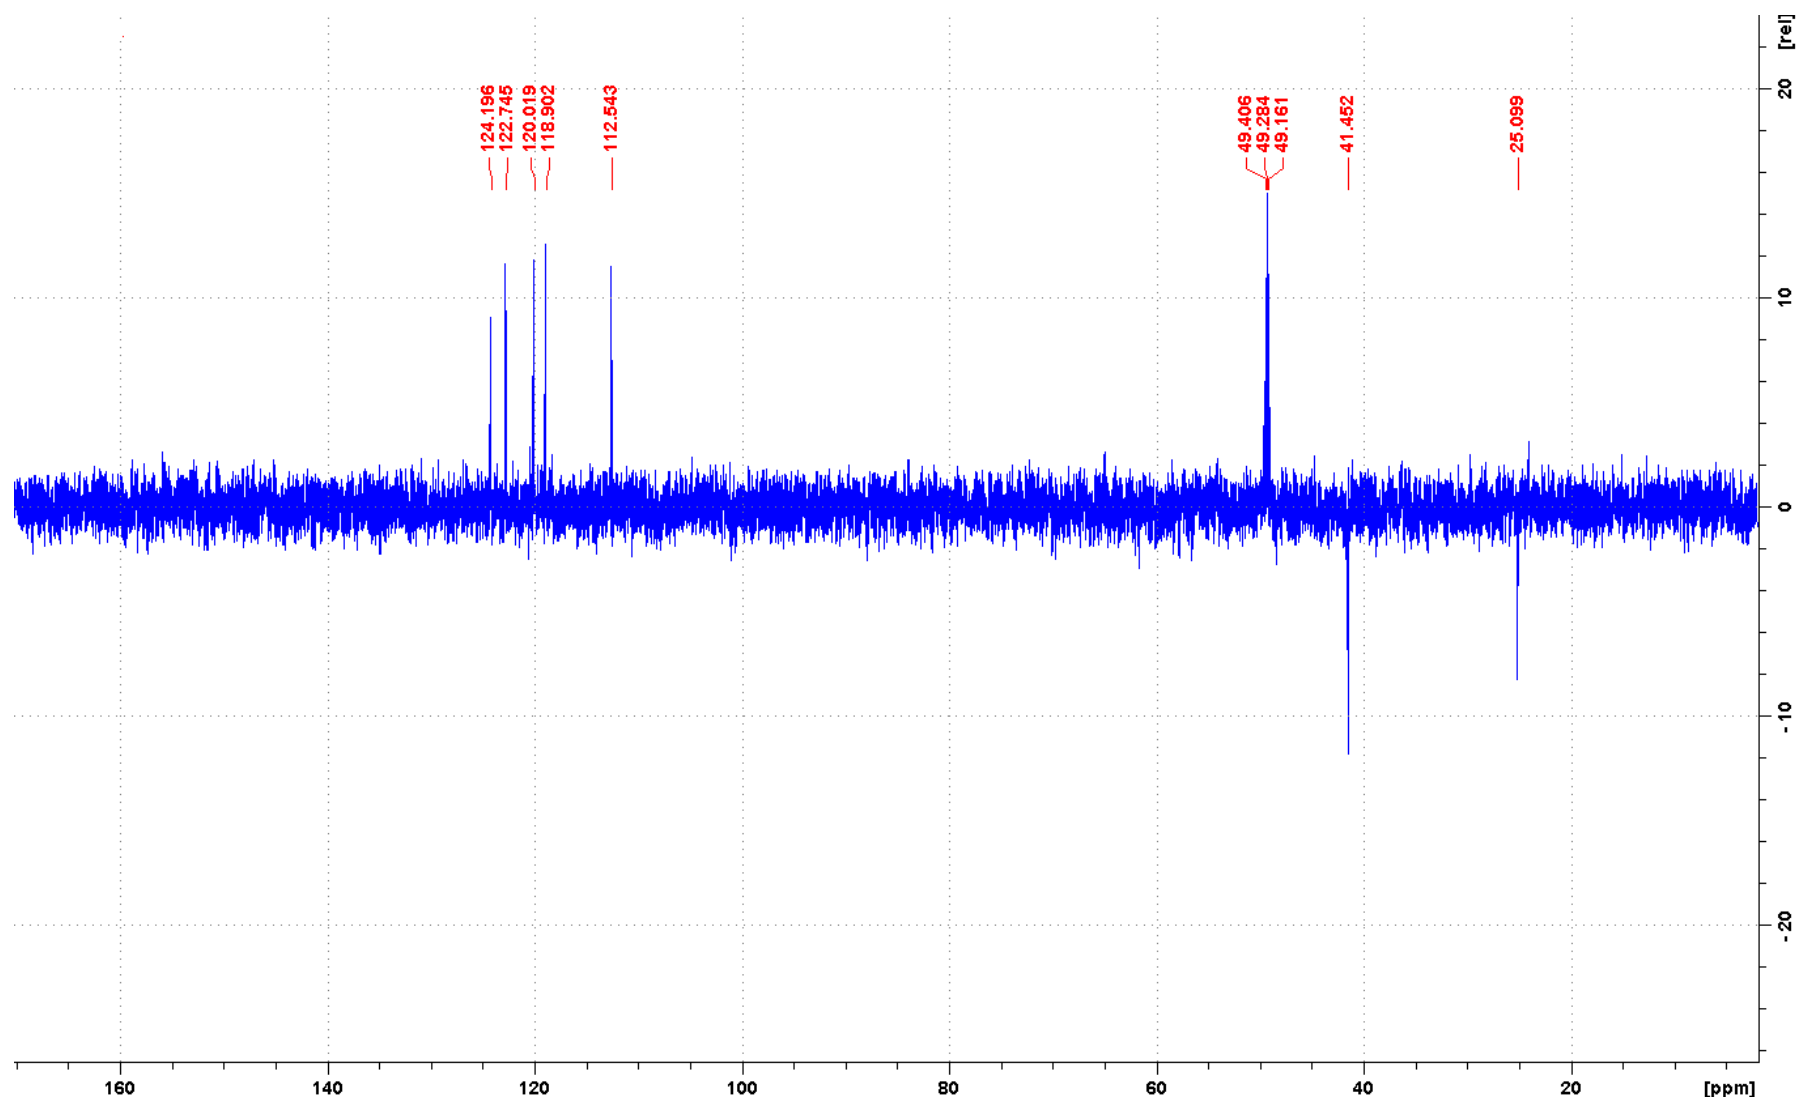

**Figure S33.**  $^1\text{H}$ - $^1\text{H}$  COSY (700.13 MHz,  $\text{CD}_3\text{OD}$ ) spectrum of compound **5**

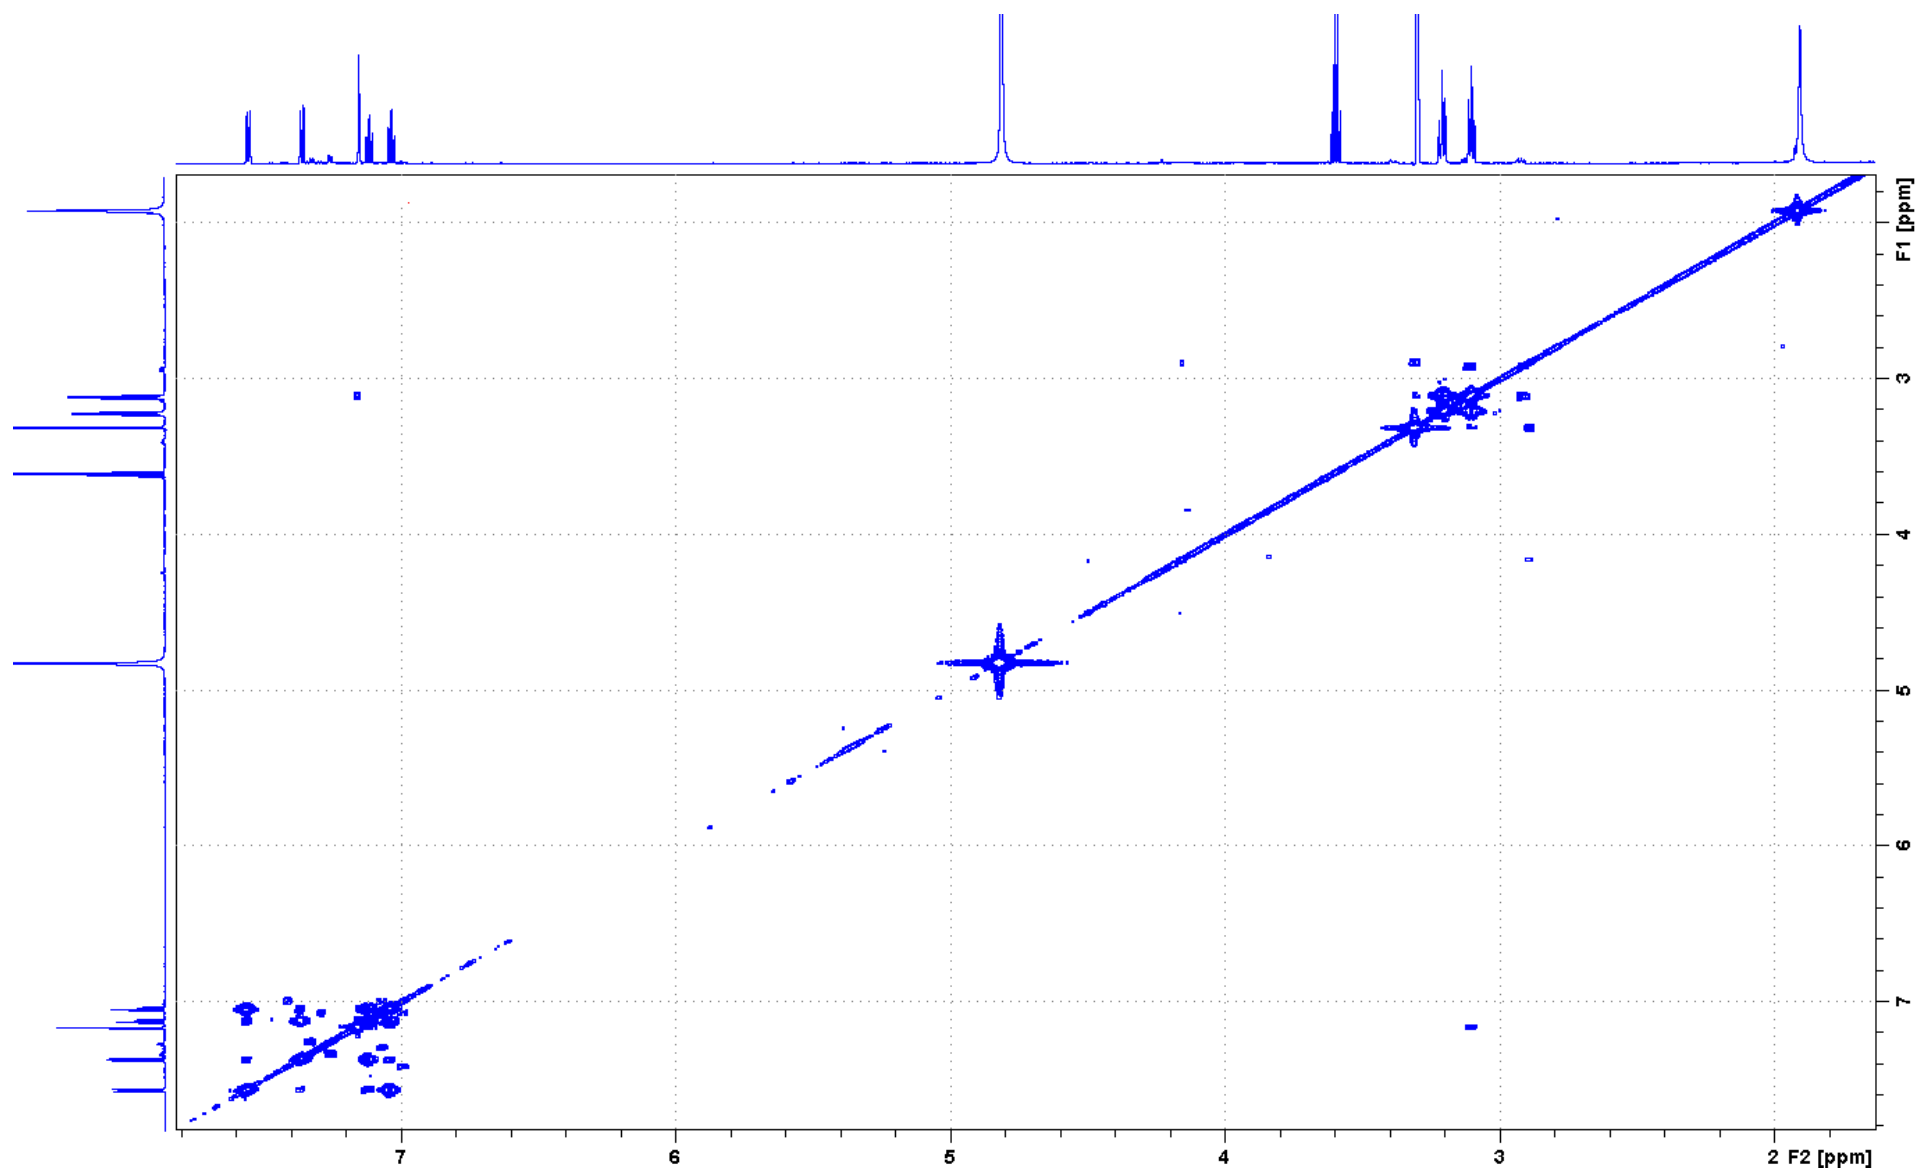

**Figure S34.** HSQC (700.13 MHz, CD<sub>3</sub>OD) spectrum of compound **5**

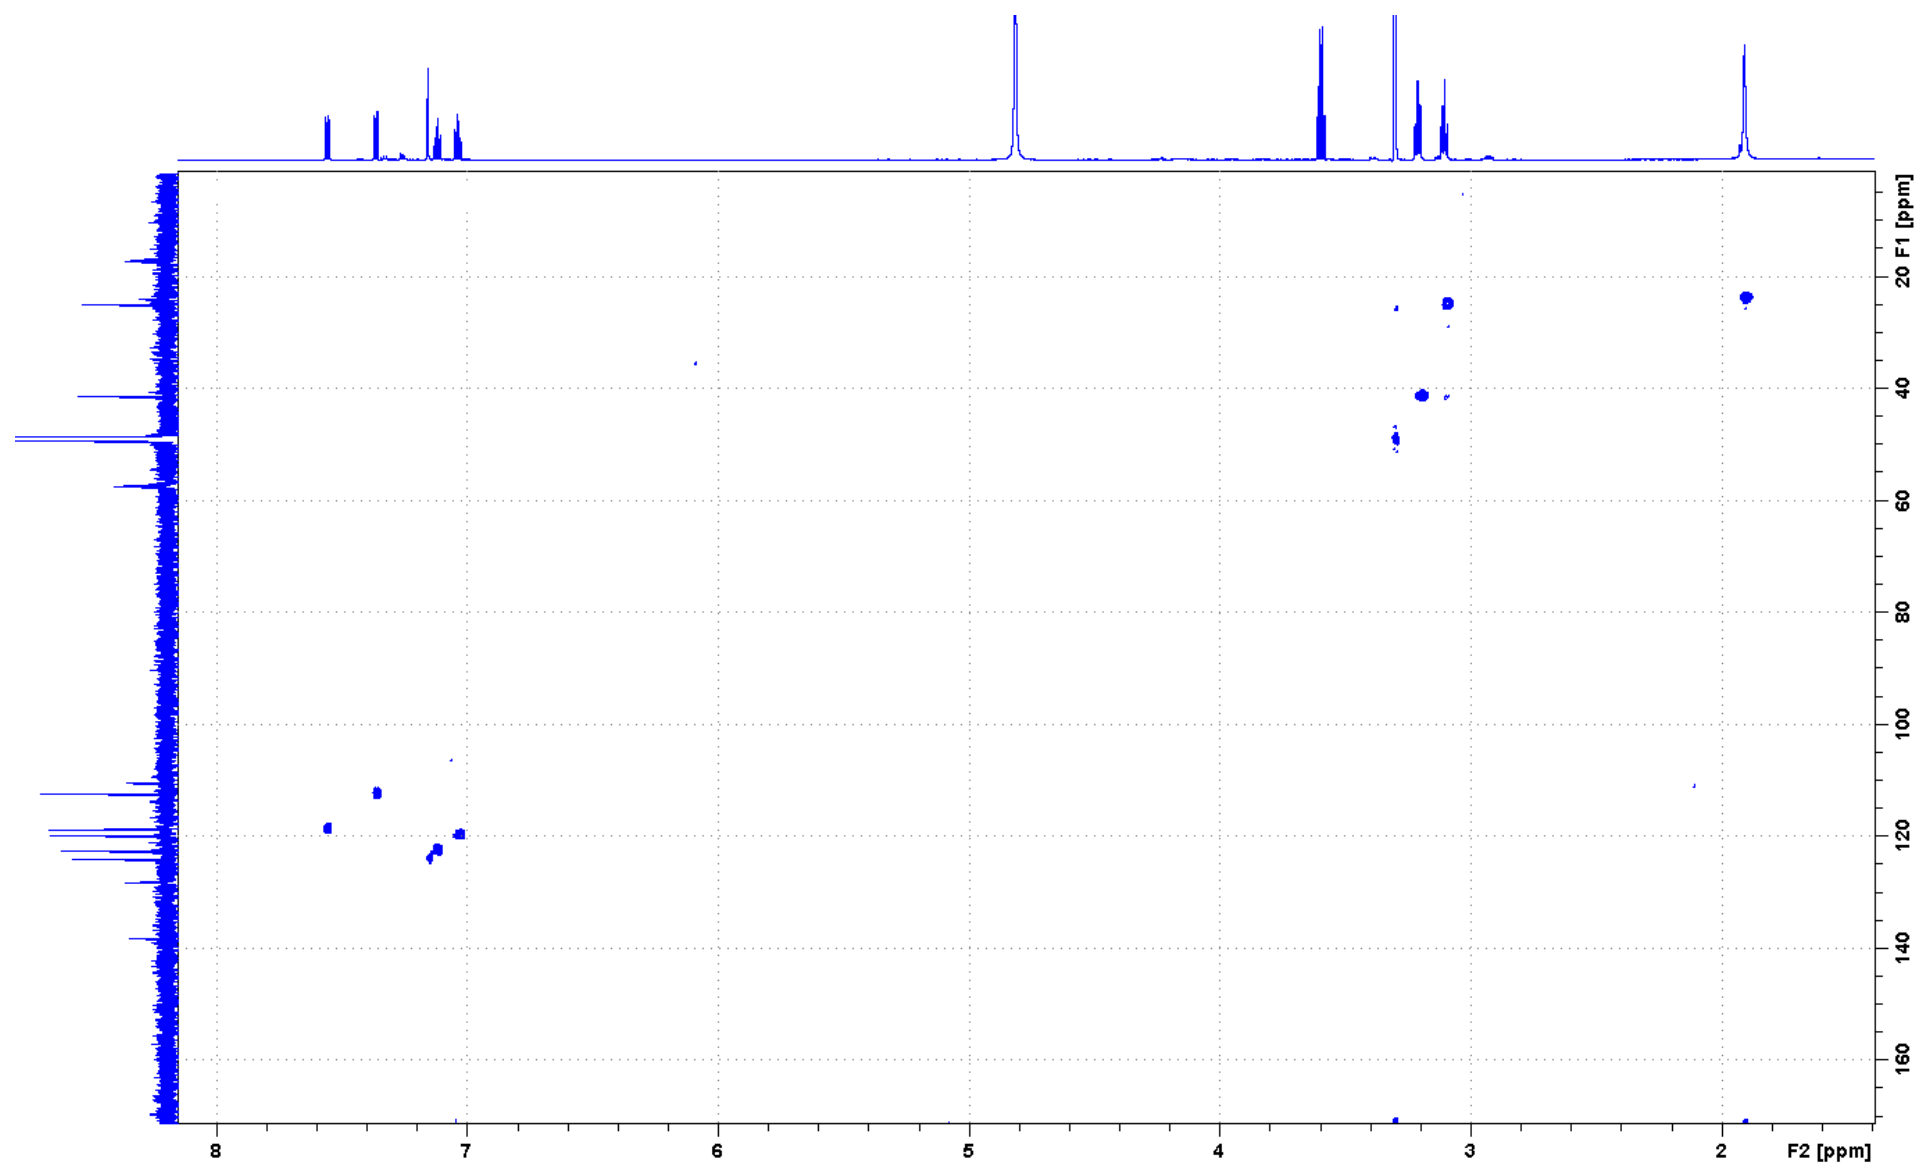

**Figure S35.** HMBC (700.13 MHz, CD<sub>3</sub>OD) spectrum of compound **5**

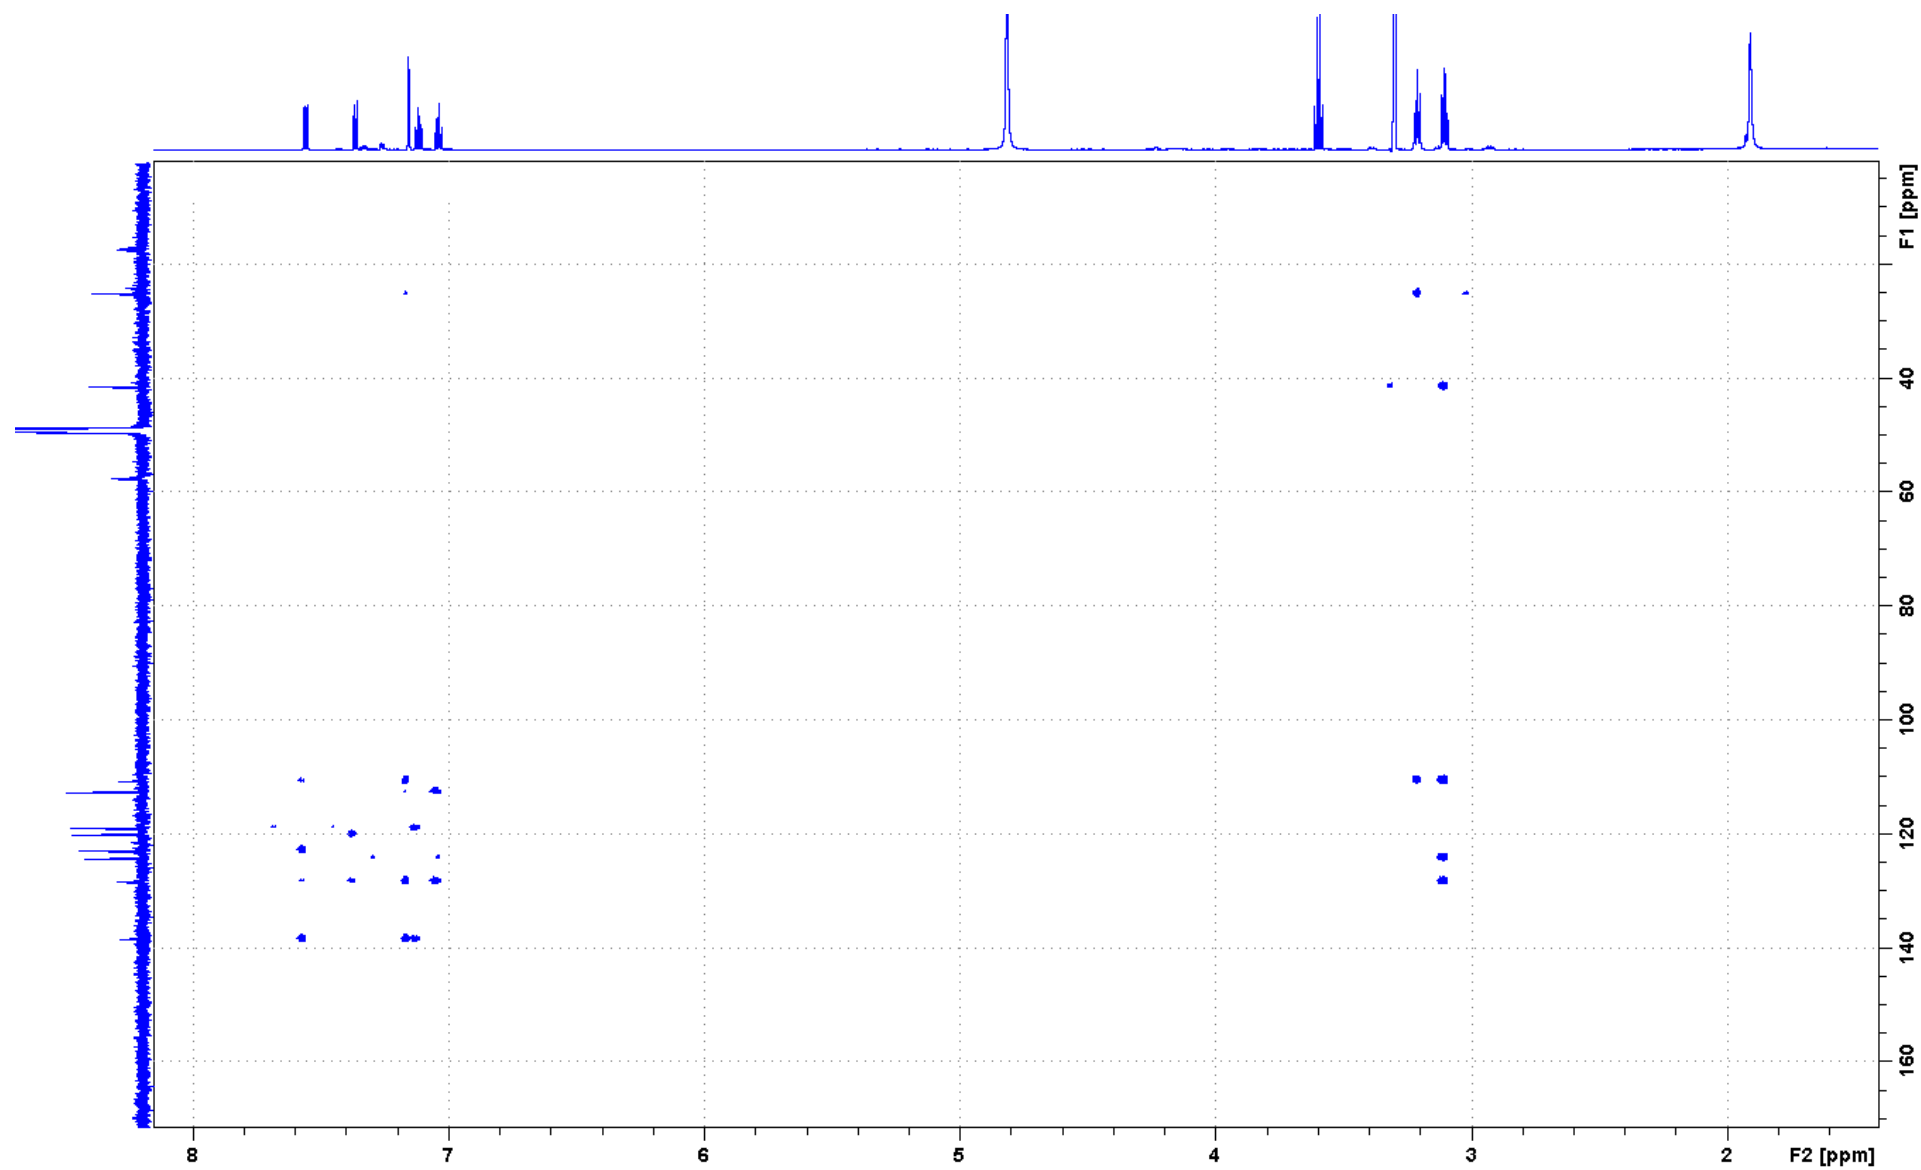

**Figure S36.** ROESY (700.13 MHz, CD<sub>3</sub>OD) spectrum of compound **5**

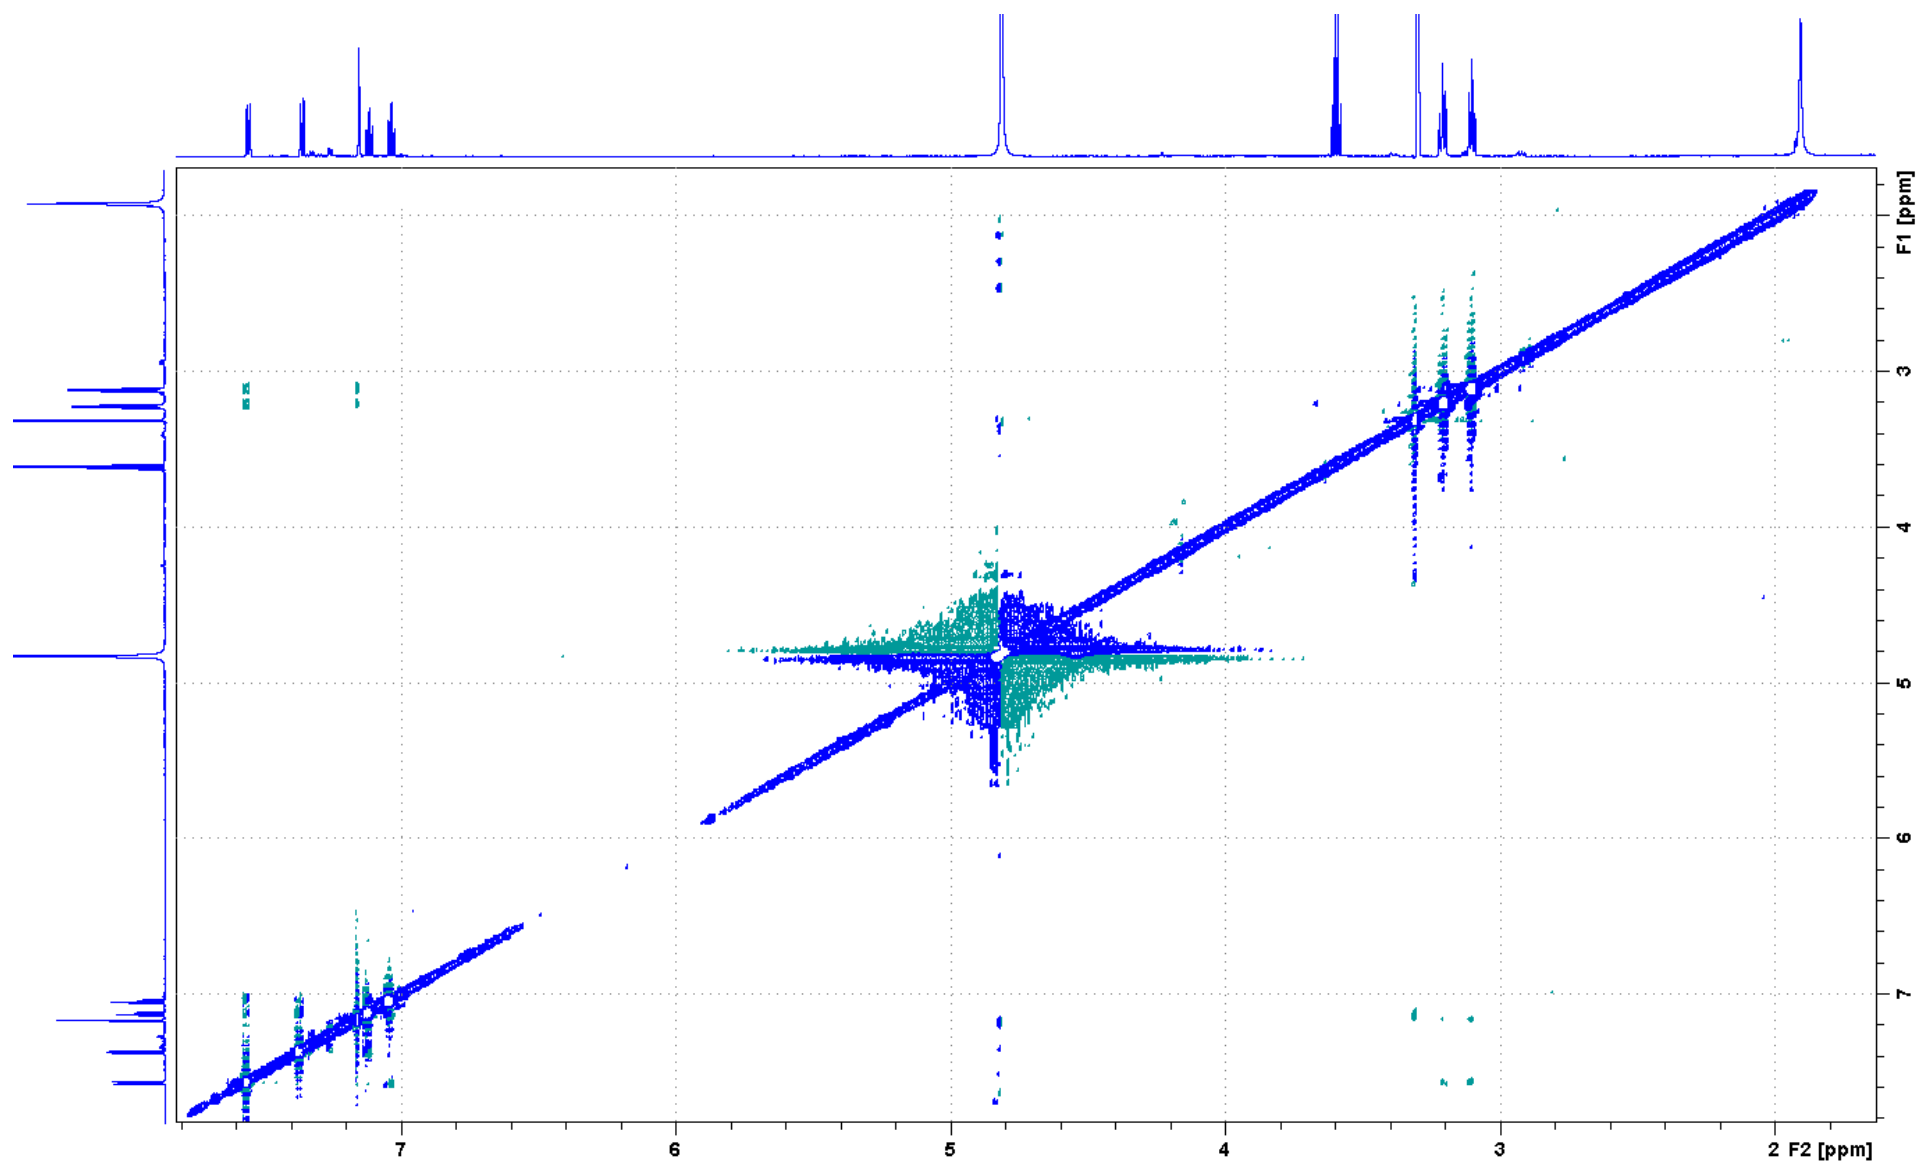

Supplement: s1 [file s1]
